# Supplementary material for: A general and direct synthesis of imidazolium ionic liquids using orthoesters
Source: Royal Society of Chemistry journal article supplement (doi:10.1039/c4gc00684d), 2014-07-22

## Supporting Information

### A general and direct synthesis of imidazolium ionic liquids using orthoester

Do Joong Kim, Kyung Hwan Oh, and Jin Kyoong Park \*

Department of Chemistry and Institute of functional materials, Pusan National University, Busan 609-735,  
Korea.

e-mail: pjkyoon@pusan.ac.kr

#### Table of contents

|                                                                             |     |
|-----------------------------------------------------------------------------|-----|
| <b>1. General remark</b>                                                    | S2  |
| 1.1 Chemical sources and general procedure                                  | S2  |
| 1.2 Instrumentation                                                         | S3  |
| <b>2. Experimental section</b>                                              | S3  |
| 2.1 Screen of other alkylating agents                                       | S3  |
| 2.2 Synthesis of ionic liquids                                              | S3  |
| 2.3 TGA data for [BMIM][BF <sub>4</sub> ]                                   | S11 |
| 2.4 Ion Chromatography                                                      | S12 |
| 2.5 High resolution mass spectra                                            | S16 |
| <b>3. References</b>                                                        | S17 |
| <b>4. Spectral Data (<sup>1</sup>H, <sup>13</sup>C, <sup>19</sup>F NMR)</b> | S18 |

## 1. General remark

### 1. 1 Chemical sources and general procedure

Commercially available reagents were used without further purification. Chemical sources of chemicals are shown below

Chemicals from C-TRI company ([http://www.c-tri.co.kr/ctri\\_eng](http://www.c-tri.co.kr/ctri_eng)).

[BMIM][BF<sub>4</sub>], Batch. No. ILI04C-131113

Halide content: 10 ppm, water content: 31.9 ppm according to the certificate of analysis

Chemicals from Aldrich

1-Butylimidazole, 98%, Cat. No. 348414

Trimethyl orthoformate, 99%, Cat. No. 108456

Ammonium tetrafluoroborate, 97+%, Cat. No. 223727

Tetrafluoroboric acid solution 48 wt. % in H<sub>2</sub>O, Cat. No. 207934

Imidazole ACS reagent, ≥99%, Cat. No. 436151

Ammonium hexafluorophosphate, ≥98.0 % , Cat. No. 0-9820

Ammonium iodide, >99%, Cat. No. 0-9874

Ammonium nitrate, 98+ %, Cat. No. 221244

Bis(trifluoromethane)sulfonimide ≥95.0%, Cat. No. 15220

Nitric acid ACS reagent, 70%, Cat. No. 438073

Hexafluorophosphoric acid ~55 wt. % in H<sub>2</sub>O, Cat. No. 200956

Chemicals from TCI

1-Phenylimidazole >98.0%(GC), Cat. No. P2030

Trifluoromethanesulfonic acid >98.0%(T), Cat. No. T0751

Isoquinoline >95.0%(GC), Cat. No. I0182

1-Vinylimidazole >98.0%(GC)(T), Cat. No. V0045

Triethyl orthoformate >98%(GC), Cat. No. O0066

Triisopropyl orthoformate >97.0%(GC), Cat. No. O0215

Tributyl orthoformate >95.0%(GC), Cat. No. O0269

Chemical from Wako

Ammonium bromide >98%, Cat. No. 1294

Chemicals from Junsei

Ammonium chloride >98%, Cat. No. 9D1547

*p*-Toluenesulfonic acid (chemical pure), Cat. No. 811572

Chemicals from Daesung

Ethyl acetate 99%,

Dichloromethane 99.5%

Acetone 99.5%

Acetonitrile 99.5%

Methyl alcohol 99.5%

1-alkyl imidazole (1 eq) and ammonium salt (1.2 eq) were mixed with trialkyl orthoformate (5 eq) under N<sub>2</sub> atmosphere. In some reactions, protic acids (HX, 1 eq) were used to protonate imidazole. All reactions were monitored by <sup>1</sup>H NMR using DMSO-d<sub>6</sub>. After the reaction, solvent was removed under reduced pressure. Reaction mixture was dissolved in suitable solvent. The mixture was filtered through basic alumina. And then solvent was removed under reduced pressure to have the desired product.

## 1.2 Instrumentation

<sup>1</sup>H NMR and <sup>13</sup>C NMR spectra were recorded in DMSO-d<sub>6</sub> and CDCl<sub>3</sub> (Cambridge isotope) at a Varian Mercury Plus 300MHz spectrometers. <sup>19</sup>F NMR spectra were recorded in DMSO-d<sub>6</sub> at Unity-Inova 500 MHz spectrometers. TG analysis were performed on DSC Q200 (TA Instruments Korea) and STA6000/8000 (Perkin Elmer). Mass spectra (FAB) were obtained using a Jeol JMS700 high-resolution mass spectrometer at the Korea Basic Science Center, Daegu, Korea. Mass spectra (ESI) were obtained using Agilent, Q-TOF 6530 at PNU Center for Research Facilities, Pusan, Korea. Ion chromatographic analysis was performed using Dionex (ICS-5000), equipped with an Dionex IonPacTM As15 column (4 x 250mm). Karl-Fisher test was performed using 831 KFC coulometer.

## 2. Experimental section

### 2.1 Screen of other alkylating agents

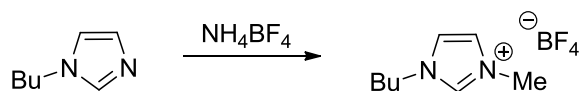

| Entry | Alkylating agent                                                  | Temp. (°C) | Time (h) | Yield <sup>a</sup> (%) |
|-------|-------------------------------------------------------------------|------------|----------|------------------------|
| 1     | CH <sub>3</sub> (OCH <sub>3</sub> ) <sub>3</sub>                  | 110        | 22       | 97                     |
| 2     | (CH <sub>3</sub> ) <sub>2</sub> (OCH <sub>3</sub> ) <sub>2</sub>  | 80         | 22       | NR                     |
| 3     | (CH <sub>3</sub> ) <sub>2</sub> N(OCH <sub>3</sub> ) <sub>3</sub> | 100        | 22       | NR                     |

<sup>a</sup> isolated yield

### 2.2 Synthesis of ionic liquids

#### 1-butyl-3-methylimidazolium bromide <sup>[1]</sup>

1-butylimidazole (1.82 mmol, 0.24 mL) and ammonium bromide (2.18 mmol, 213 mg) was mixed with trimethyl orthoformate (9.1 mmol, 1 mL). The reaction mixture was heated to 110 °C for 22 h. After the reaction, solvent was removed under reduced pressure. Residue was dissolved in ethyl acetate and methanol. The mixture was filtered through basic alumina. Solvent was removed under reduced pressure and then the resulting product (1.74 mmol, 383 mg) was collected in 96% yield.

<sup>1</sup>H NMR δ0.83 (t, J=7.5 Hz, 3H) 1.19 (sextet, J=7.5 Hz, 2H) 1.74 (quintet, J=7.5 Hz, 2H) 3.88 (s, 3H) 4.21 (t, J=7.5 Hz, 2H) 7.82 (s, 1H) 7.91 (s, 1H) 9.45 (s, 1H) <sup>13</sup>C NMR δ13.70 19.17 31.85 36.25 48.83 122.67 123.94 137.98

### **1-butyl-3-methylimidazolium iodide <sup>[1]</sup>**

1-butylimidazole (1.82 mmol, 0.24 mL) and ammonium iodide (2.18 mmol, 316 mg) was mixed with trimethyl orthoformate (9.1 mmol, 1 mL). The reaction mixture was heated to 110 °C for 20 h. After the reaction, solvent was removed under reduced pressure. Residue was dissolved in ethyl acetate and methanol. The mixture was filtered through basic alumina. Solvent was removed under reduced pressure and then the resulting product (1.77 mmol, 472 mg) was collected in 97% yield.

<sup>1</sup>H NMR δ0.89 (t, J=7.5 Hz, 3H) 1.24 (sextet, J=7.5 Hz, 2H) 1.76 (quintet, J=7.5 Hz, 2H) 3.85 (s, 3H) 4.17 (t, J=7.5 Hz, 2H) 7.72 (s, 1H) 7.80 (s, 1H) 9.16 (s, 1H) <sup>13</sup>C NMR δ13.99 19.45 32.03 36.56 49.18 122.95 124.27 137.16

### **1-butyl-3-methylimidazolium nitrate <sup>[1]</sup>**

1-butylimidazole (1.82 mmol, 0.24 mL) and ammonium nitrate (2.18 mmol, 174 mg) was mixed with trimethyl orthoformate (9.1 mmol, 1 mL). The reaction mixture was heated to 110 °C for 48 h. After the reaction, solvent was removed under reduced pressure. Residue was dissolved in ethyl acetate and methanol. The mixture was filtered through basic alumina. Solvent was removed under reduced pressure and then the resulting product (1.75 mmol, 353 mg) was collected in 96% yield.

<sup>1</sup>H NMR δ0.86 (t, J=7.5 Hz, 3H) 1.21 (sextet, J=7.5 Hz, 2H) 1.74 (quintet, J=7.5 Hz, 2H) 3.85 (s, 3H) 4.17 (t, J=7.5 Hz, 2H) 7.72 (s, 1H) 7.80 (s, 1H) 9.24 (s, 1H) <sup>13</sup>C NMR δ13.85 19.43 32.05 36.27 49.15 122.95 124.25 137.37

### **1-butyl-3-methylimidazolium tetrafluoroborate <sup>[2]</sup>**

1-butylimidazole (1.82 mmol, 0.24 mL) and ammonium tetrafluoroborate (2.18 mmol, 229 mg) was mixed with trimethyl orthoformate (9.1 mmol, 1 mL). The reaction mixture was heated to 110 °C for 17 h. After the reaction, solvent was removed under reduced pressure. Residue was dissolved in ethyl acetate and methanol. The mixture was filtered through basic alumina. Solvent was removed under reduced pressure and then the resulting product (1.76 mmol, 400 mg) was collected in 97% yield.

<sup>1</sup>H NMR δ0.89 (t, J=7.5 Hz, 3H) 1.24 (sextet, J=7.5 Hz, 2H) 1.76 (quintet, J=7.5 Hz, 2H) 3.85 (s, 3H) 4.16 (d, J=7.5 Hz, 2H) 7.65 (s, 1H) 7.72 (s, 1H) 9.02 (s, 1H) <sup>13</sup>C NMR δ13.83 19.40 31.99 36.29 49.18 122.86 124.19 137.10

### **1-butyl-3-methylimidazolium hexafluorophosphate <sup>[2]</sup>**

1-butylimidazole (1.82 mmol, 0.24 mL) and ammonium hexafluorophosphate (2.18 mmol, 356 mg) was mixed with trimethyl orthoformate (9.1 mmol, 1 mL). The reaction mixture was heated to 110 °C for 17 h. After the reaction, solvent was removed under reduced pressure. Residue was dissolved in ethyl acetate and methanol. The mixture was filtered through basic alumina. Solvent was removed under reduced pressure and then the resulting product (1.61 mmol, 460 mg) was collected in 88% yield.

<sup>1</sup>H NMR δ0.90 (t, J=7.5 Hz, 3H) 1.28 (sextet, J=7.5 Hz, 2H) 1.77 (quintet, J=7.5 Hz, 2H) 3.84 (s, 3H) 4.15 (d, J=7.5 Hz, 2H) 7.65 (s, 1H) 7.71 (s, 1H) 9.05 (s, 1H) <sup>13</sup>C NMR δ13.80 19.40 31.97 36.28 49.20 122.83 124.19 137.12



### 1-butyl-3-methylimidazolium tetrafluoroborate

Aqueous tetrafluoroboric acid (1.82 mmol, 0.237 mL) was added to 1-butylimidazole (1.82 mmol, 0.24 mL) at 0 °C and water was removed under reduced pressure using phosphorus pentoxide. And then trimethyl orthoformate (9.1 mmol, 1 mL) was added to the residue. The reaction mixture was heated to 110 °C for 20 h. After the reaction, triethyl orthoformate was removed under reduced pressure. Residue was dissolved in ethyl acetate and the mixture was filtered through basic alumina. Solvent removed under vacuum and then the resulting product (1.74 mmol, 394 mg) was collected in 96% yield.

<sup>1</sup>H NMR δ0.89 (t, J=7.5 Hz, 3H) 1.24 (sextet, J=7.5 Hz, 2H) 1.76 (quintet, J=7.5 Hz, 2H) 3.85 (s, 3H) 4.16 (d, J=7.5 Hz, 2H) 7.65 (s, 1H) 7.72 (s, 1H) 9.02 (s, 1H) <sup>13</sup>C NMR δ13.83 19.40 31.99 36.29 49.18 122.86 124.19 137.10

### 1-butyl-3-methylimidazolium hexafluorophosphate

Aqueous hexafluorophosphoric acid (1.82 mmol, 0.247 mL) was added to 1-butylimidazole (1.82 mmol, 0.24 mL) at 0 °C and water was removed under reduced pressure using phosphorus pentoxide. And then trimethyl orthoformate (9.1 mmol, 1 mL) was added to the residue. The reaction mixture was heated to 110 °C for 20 h. After the reaction, triethyl orthoformate was removed under reduced pressure. Residue was dissolved in ethyl acetate and the mixture was filtered through basic alumina. Solvent removed under reduced pressure and then the resulting product (1.73 mmol, 494 mg) was collected in 95% yield.

<sup>1</sup>H NMR δ0.90 (t, J=7.5 Hz, 3H) 1.28 (sextet, J=7.5 Hz, 2H) 1.77 (quintet, J=7.5 Hz, 2H) 3.84 (s, 3H) 4.15 (d, J=7.5 Hz, 2H) 7.65 (s, 1H) 7.71 (s, 1H) 9.05 (s, 1H) <sup>13</sup>C NMR δ13.80 19.40 31.97 36.28 49.20 122.83 124.19 137.12

### 1-butyl-3-methylimidazolium bis(trifluoromethylsulfonyl)amide <sup>[1]</sup>

1-butylimidazole (1.69 mmol, 0.22 mL) and bis(trifluoromethane)sulfonimide (1.69 mmol, 475 mg) was mixed with trimethyl orthoformate (9.1 mmol, 1 mL). The reaction mixture was heated to 110 °C for 20 h. After the reaction, solvent was removed under reduced pressure. Residue was dissolved in ethyl acetate and methanol. The mixture was filtered through basic alumina. Solvent was removed under reduced pressure and then the resulting product (1.66 mmol, 645 mg) was collected in 99% yield.

<sup>1</sup>H NMR δ0.90 (t, J=7.5 Hz, 3H) 1.26 (sextet, J=7.5 Hz, 2H) 1.78 (quintet, J=7.5 Hz, 2H) 3.85 (s, 3H) 4.16 (t, J=7.5 Hz, 2H) 7.66 (s, 1H) 7.72 (s, 1H) 9.09 (s, 1H) <sup>13</sup>C NMR δ13.37 19.12 31.75 35.98 48.96 113.51 117.77 122.03 122.58 123.92 126.28 136.90

### 1-butyl-3-methylimidazolium trifluoromethanesulfonate <sup>[3]</sup>

1-butylimidazole (1.82 mmol, 0.24 mL) and trifluoromethanesulfonic acid (1.82 mmol, 0.16 mL) was mixed with trimethyl orthoformate (9.1 mmol, 1 mL). The reaction mixture was heated to 110 °C for 20 h. After the reaction, solvent was removed under reduced pressure. Residue was dissolved in ethyl acetate and methanol. The mixture was filtered through basic alumina. Solvent was removed under reduced pressure and then the resulting product (1.72 mmol, 496 mg) was collected in 95% yield.

<sup>1</sup>H NMR δ0.89 (t, J=7.5 Hz, 3H) 1.27 (sextet, J=7.5 Hz, 2H) 1.76 (quintet, J=7.5 Hz, 2H) 3.85 (s, 3H) 4.16 (t, J=7.5 Hz, 2H) 7.68 (s, 1H) 7.75 (s, 1H) 9.08 (s, 1H) <sup>13</sup>C NMR δ13.56 19.15 31.75 36.07 48.93 114.66 118.92 122.62 123.19 123.97 127.45 136.90

#### **1-butyl-3-methylimidazolium 4-methylbenzenesulfonate** <sup>[4]</sup>

1-butylimidazole (1.82 mmol, 0.24 mL) and *p*-toluenesulfonic acid (1.82 mmol, 346 mg) was mixed with trimethyl orthoformate (9.1 mmol, 1 mL). The reaction mixture was heated to 110 °C for 20 h. After the reaction, solvent was removed under reduced pressure. Residue was dissolved in dichloromethane. The mixture was filtered through basic alumina. Solvent was removed under reduced pressure and then the resulting product (1.71 mmol, 532 mg) was collected in 94% yield.

<sup>1</sup>H NMR δ 0.8 (t, J=7.5 Hz, 3H) 1.22 (sextet, J=7.5 Hz, 2H) 1.74 (quintet, J=7.5 Hz, 2H) 3.84 (s, 3H) 4.15 (t, J=7.5 Hz, 2H) 7.11 (d, J=7.8 Hz, 2H) 7.48 (d, J=7.8 Hz, 2H) 7.71 (s, 1H) 7.77 (s, 1H) 9.15 (s, 1H) <sup>13</sup>C NMR δ 13.73 19.21 21.23 31.82 36.15 48.90 122.74 124.05 125.92 128.52 137.01 138.09 146.18

#### **1,3-dimethylimidazolium hexafluorophosphate** <sup>[5]</sup>

1-methylimidazole (1.82 mmol, 0.145 mL) and ammonium hexafluorophosphate (2.18 mmol, 356 mg) was mixed with trimethyl orthoformate (9.1 mmol, 1 mL). The reaction mixture was heated to 110 °C for 20 h. After the reaction, solvent was removed under reduced pressure. Residue was dissolved in ethyl acetate and methanol. The mixture was filtered through basic alumina. Solvent was removed under reduced pressure and then the resulting product (1.79 mmol, 433 mg) was collected in 98% yield.

<sup>1</sup>H NMR δ 3.84 (s, 6H) 7.66 (s, 2H) 9.00 (s, 1H) <sup>13</sup>C NMR δ 36.28 124.08 137.6

#### **1,3-dimethylimidazolium tetrafluoroborate** <sup>[6]</sup>

1-methylimidazole (1.82 mmol, 0.145 mL) and ammonium tetrafluoroborate (2.18 mmol, 229 mg) was mixed with trimethyl orthoformate (9.1 mmol, 1 mL). The reaction mixture was heated to 110 °C for 20 h. After the reaction, solvent was removed under reduced pressure. Residue was dissolved in ethyl acetate and methanol. The mixture was filtered through basic alumina. Solvent was removed under reduced pressure and then the resulting product (1.71 mmol, 314 mg) was collected in 94% yield.

<sup>1</sup>H NMR δ 3.84 (s, 6H) 7.66 (s, 2H) 9.00 (s, 1H) <sup>13</sup>C NMR δ 36.09 123.89 137.46

#### **1-allyl-3-methylimidazolium hexafluorophosphate**

1-allylimidazole (1.82 mmol, 0.195 mL) and ammonium hexafluorophosphate (2.18 mmol, 356 mg) was mixed with trimethyl orthoformate (9.1 mmol, 1 mL). The reaction mixture was heated to 110 °C for 22 h. After the reaction, solvent was removed under reduced pressure. Residue was dissolved in ethyl acetate and methanol. The mixture was filtered through basic alumina. Solvent was removed under reduced pressure and then the resulting product (1.81 mmol, 487 mg) was collected in 97% yield. HRMS (FAB+) calcd for C<sub>7</sub>H<sub>11</sub>N<sub>2</sub>:123.0922; found, 123.0921

<sup>1</sup>H NMR δ 3.86 (s, 3H) 4.83 (d, J=6 Hz, 2H) 5.28 (d, J=17 Hz, 1H) 5.39 (d, J=11.5 Hz, 1H) 6.01 (m, 1H) 7.66 (s, 2H) 9.06 (s, 1H) <sup>13</sup>C NMR δ 36.14 51.25 12.68 122.70 124.16 131.96 137.04

#### **1-allyl-3-methylimidazolium tetrafluoroborate** <sup>[7]</sup>

1-allylimidazole (1.82 mmol, 0.195 mL) and ammonium tetrafluoroborate (2.18 mmol, 229 mg) was mixed with trimethyl orthoformate (9.1 mmol, 1 mL). The reaction mixture was heated to 110 °C for 22 h. After the reaction, solvent was removed under reduced pressure. Residue was dissolved in ethyl

acetate and methanol. The mixture was filtered through basic alumina. Solvent was removed under reduced pressure and then the resulting product (1.79 mmol, 376 mg) was collected in 96% yield.

$^1\text{H}$  NMR  $\delta$  3.85 (s, 3H) 4.83 (d,  $J=6$  Hz, 2H) 5.28 (d,  $J=17$  Hz, 1H) 5.39 (d,  $J=11.5$  Hz, 1H) 6.02 (m, 1H) 7.70 (s, 2H) 9.08 (s, 1H)  $^{13}\text{C}$  NMR  $\delta$  36.16 51.20 120.63 122.73 124.17 132.11 136.99

### **1-benzyl-3-methylimidazolium hexafluorophosphate <sup>[8]</sup>**

1-benzylimidazole (1.82 mmol, 288 mg) and ammonium hexafluorophosphate (2.18 mmol, 356 mg) was mixed with trimethyl orthoformate (9.1 mmol, 1 mL). The reaction mixture was heated to 110 °C for 19 h. After the reaction, solvent was removed under reduced pressure. Residue was dissolved in ethyl acetate and methanol. The mixture was filtered through basic alumina. Solvent was removed under reduced pressure and then the resulting product (1.80 mmol, 576 mg) was collected in 99% yield.

$^1\text{H}$  NMR  $\delta$  3.86 (s, 3H) 5.42 (s, 2H) 7.42 (s, 5H) 7.70 (s, 1H) 7.78 (s, 1H) 9.20 (s, 1H)  $^{13}\text{C}$  NMR  $\delta$  36.30 52.36 122.80 124.45 128.70 129.19 129.44 135.25 137.13

### **1-benzyl-3-methylimidazolium tetrafluoroborate <sup>[8]</sup>**

1-benzylimidazole (1.82 mmol, 288 mg) and ammonium tetrafluoroborate (2.18 mmol, 229 mg) was mixed with trimethyl orthoformate (9.1 mmol, 1 mL). The reaction mixture was heated to 110 °C for 19 h. After the reaction, solvent was removed under reduced pressure. Residue was dissolved in ethyl acetate and methanol. The mixture was filtered through basic alumina. Solvent was removed under reduced pressure and then the resulting product (1.77 mmol, 461 mg) was collected in 97% yield.

$^1\text{H}$  NMR  $\delta$  3.85 (s, 3H) 5.41 (s, 2H) 7.42 (s, 5H) 7.71 (s, 1H) 7.78 (s, 1H) 9.19 (s, 1H)  $^{13}\text{C}$  NMR  $\delta$  36.29 52.30 122.78 124.44 128.73 129.19 129.45 135.32 137.07

### **3-methyl-1-phenylimidazolium hexafluorophosphate**

1-phenylimidazole (1.03 mmol, 0.13 mL) and ammonium hexafluorophosphate (1.24 mmol, 201 mg) was mixed with trimethyl orthoformate (5.15 mmol, 0.56 mL). The reaction mixture was heated to 110 °C for 20 h. After the reaction, solvent was removed under reduced pressure. Residue was dissolved in ethyl acetate and acetone. The mixture was filtered through basic alumina. Solvent was removed under reduced pressure and then the resulting product (1.00 mmol, 318 mg) was collected in 97% yield. HRMS (FAB+) calcd for  $\text{C}_{10}\text{H}_{11}\text{N}_2$ : 159.0922; found, 159.0923

$^1\text{H}$  NMR  $\delta$  3.94 (s, 1H) 7.59 (d,  $J=7.2$  Hz, 1H) 7.67 (t,  $J=7.2$  Hz, 2H) 7.77 (d,  $J=7.2$  Hz, 2H) 7.93 (s, 1H) 8.28 (s, 1H) 9.73 (s, 1H)  $^{13}\text{C}$  NMR  $\delta$  36.56 121.47 122.30 124.88 130.23 130.67 135.21 136.41

### **3-methyl-1-phenylimidazolium tetrafluoroborate**

1-phenylimidazole (1.03 mmol, 0.13 mL) and ammonium tetrafluoroborate (1.24 mmol, 130 mg) was mixed with trimethyl orthoformate (5.15 mmol, 0.56 mL). The reaction mixture was heated to 110 °C for 20 h. After the reaction, solvent was removed under reduced pressure. Residue was dissolved in ethyl acetate and methanol. The mixture was filtered through basic alumina. Solvent was removed under reduced pressure and then the resulting product (1.00 mmol, 244 mg) was collected in 96% yield. HRMS (FAB+) calcd for  $\text{C}_{10}\text{H}_{11}\text{N}_2$ : 159.0922; found, 159.0925

$^1\text{H}$  NMR  $\delta$  3.94 (s, 1H) 7.59 (d,  $J=7.2$  Hz, 1H) 7.69 (t,  $J=7.2$  Hz, 2H) 7.76 (d,  $J=7.2$  Hz, 2H) 7.94 (s, 1H) 8.29 (s, 1H) 9.73 (s, 1H)  $^{13}\text{C}$  NMR  $\delta$  36.56 121.41 122.25 124.87 130.20 130.68 135.20 136.38

### 3-methyl-1-vinylimidazolium hexafluorophosphate

1-vinylimidazole (1.82 mmol, 0.165 mL) and ammonium hexafluorophosphate (2.18 mmol, 356 mg) was mixed with trimethyl orthoformate (9.1 mmol, 1 mL). The reaction mixture was heated to 110 °C for 22 h. After the reaction, solvent was removed under reduced pressure. Residue was dissolved in acetonitrile. The mixture was filtered through basic alumina. Solvent was removed under reduced pressure and then the resulting product (1.76 mmol, 452 mg) was collected in 97% yield. HRMS (FAB+) calcd for C<sub>6</sub>H<sub>9</sub>N<sub>2</sub>: 109.0766; found, 109.0765

<sup>1</sup>H NMR δ3.88 (s, 3H) 5.39 (d, J=8.8 Hz, 1H) 5.90 (d, J=15.7 Hz, 1H) 7.26 (dd, J<sub>1</sub>=15.7 Hz, J<sub>2</sub>=8.8 Hz) 7.82 (s, 1H) 8.15 (s, 1H) 9.38 (s, 1H) <sup>13</sup>C NMR δ36.42 108.86 119.27 124.83 129.28 136.50

### 3-methyl-1-vinylimidazolium tetrafluoroborate

1-vinylimidazole (1.82 mmol, 0.165 mL) and ammonium tetrafluoroborate (2.18 mmol, 229 mg) was mixed with trimethyl orthoformate (9.1 mmol, 1 mL). The reaction mixture was heated to 110 °C for 22 h. After the reaction, solvent was removed under reduced pressure. Residue was dissolved in ethyl acetate and methanol. The mixture was filtered through basic alumina. Solvent was removed under reduced pressure and then the resulting product (1.76 mmol, 346 mg) was collected in 96% yield. HRMS (FAB+) calcd for C<sub>6</sub>H<sub>9</sub>N<sub>2</sub>: 109.0766; found, 109.0765

<sup>1</sup>H NMR δ3.85 (s, 3H) 5.39 (d, J=8.8 Hz, 1H) 5.90 (d, J=15.7 Hz, 1H) 7.26 (dd, J<sub>1</sub>=15.7 Hz, J<sub>2</sub>=8.8 Hz) 7.78 (s, 1H) 8.12 (s, 1H) 9.35 (s, 1H) <sup>13</sup>C NMR δ36.42 108.86 119.27 124.83 129.28 136.50

### 1-butyl-3-ethylimidazolium tetrafluoroborate

Aqueous tetrafluoroboric acid (1.82 mmol, 0.237 mL) was added to 1-butylimidazole (1.82 mmol, 0.24 mL) at 0 °C and water was removed under reduced pressure using phosphorus pentoxide. And then triethyl orthoformate (9.1 mmol, 1.5 mL) was added to residue. The reaction mixture was heated to 120 °C for 25 h. After the reaction, triethyl orthoformate was removed under reduced pressure. Residue was dissolved in ethyl acetate and the mixture was filtered through basic alumina. Solvent was removed under reduced pressure and then the resulting product (1.66 mmol, 399 mg) was collected in 91% yield. HRMS (FAB+) calcd for C<sub>9</sub>H<sub>17</sub>N<sub>2</sub>: 153.1392; found, 153.1391

<sup>1</sup>H NMR δ0.89 (t, J=7.5 Hz, 3H) 1.25 (sextet, J=7.5 Hz, 2H) 1.41 (t, J=7.5 Hz, 3H) 1.78 (quintet, J=7.5 Hz, 2H) 4.17 (m, 4H) 7.77 (s, 2H) 9.12 (s, 1H) <sup>13</sup>C NMR δ13.62 15.34 19.22 31.72 44.66 49.02 122.51 122.79 136.02

### 1-butyl-3-propylimidazolium tetrafluoroborate

Aqueous tetrafluoroboric acid (1.82 mmol, 0.237 mL) was added to 1-butylimidazole (1.82 mmol, 0.24 mL) at 0 °C and water was removed under reduced pressure using phosphorus pentoxide. And then tripropyl orthoformate (9.1 mmol, 1.9 mL) was added to residue. The reaction mixture was heated to 130 °C for 28 h. After the reaction, tripropyl orthoformate was removed under reduced pressure. Residue was dissolved in ethyl acetate and the mixture was filtered through basic alumina. Solvent was removed under vacuum and then the resulting product (1.68 mmol, 429 mg) was collected in 93% yield. HRMS (FAB+) calcd for C<sub>10</sub>H<sub>19</sub>N<sub>2</sub>: 167.1548; found, 167.1546

<sup>1</sup>H NMR δ0.87 (m, 6H) 1.25 (sextet, J=7.5 Hz, 2H) 1.82 (m, 4H) 4.14 (m, 4H) 7.79 (s, 2H) 9.17 (s, 1H) <sup>13</sup>C NMR δ10.90 13.80 19.42 23.43 31.93 49.27 51.02 123.05 136.53

### 1-butyl-3-isopropylimidazolium tetrafluoroborate

Aqueous tetrafluoroboric acid (1.82 mmol, 0.237 mL) was added to 1-butylimidazole (1.82 mmol, 0.24 mL) at 0 °C and water was removed under reduced pressure using phosphorus pentoxide. And then triisopropyl orthoformate (9.1 mmol, 1.9 mL) was added to the residue. The reaction mixture was heated to 130 °C for 24 h. After the reaction, triisopropyl orthoformate was removed under reduced pressure. Residue was dissolved in ethyl acetate and the mixture was filtered through basic alumina. Solvent was removed under reduced pressure and then the resulting product (1.44 mmol, 366 mg) was collected in 79% yield. HRMS (FAB+) calcd for C<sub>10</sub>H<sub>19</sub>N<sub>2</sub>: 167.1548; found, 167.1551

<sup>1</sup>H NMR δ 0.90 (t, J=7.5 Hz, 3H) 1.26 (sextet, J=7.5 Hz, 2H) 1.48 (d, J=6.0 Hz, 6H) 1.80 (quintet, J=7.5 Hz, 2H) 4.16 (t, J=7.5 Hz, 2H) 4.62 (septet, J=6.0 Hz, 1H) 7.77 (s, 1H) 7.87 (s, 1H) 9.16 (s, 1H) <sup>13</sup>C NMR δ 13.62 19.26 31.71 49.06 52.71 120.97 122.88 135.06

### 1,3-dibutylimidazolium tetrafluoroborate <sup>[9]</sup>

Aqueous tetrafluoroboric acid (1.82 mmol, 0.237 mL) was added to 1-butylimidazole (1.82 mmol, 0.24 mL) at 0 °C and water was removed under reduced pressure using phosphorus pentoxide. And then tributyl orthoformate (9.1 mmol, 2.4 mL) was added to the residue. The reaction mixture was heated to 140 °C for 24 h. After the reaction, tributyl orthoformate was removed under reduced pressure. Residue was dissolved in ethyl acetate and the mixture was filtered through basic alumina. Solvent was removed under reduced pressure and then the resulting product (1.70 mmol, 457 mg) was collected in 94% yield.

<sup>1</sup>H NMR 0.90 (t, J=7.5 Hz, 6H) 1.24 (sextet, J=7.5 Hz, 4H) 1.77 (t, J=7.5 Hz, 4H) 4.16 (t, J=7.5 Hz, 4H) 7.79 (s, 2H) 9.18 (s, 1H) <sup>13</sup>C NMR δ 13.62 19.19 31.71 49.02 122.85 136.30

### N-methylisoquinolinium tetrafluoroborate

Isoquinoline (1.82 ml, 0.21 mL) and ammonium tetrafluoroborate (2.18 mmol, 229 mg) was mixed with trimethyl orthoformate (9.1 mmol, 1 mL). The reaction mixture was heated to 110 °C for 24 h. After the reaction, solvent was removed under reduced pressure. Ethyl acetate was added to the residue for recrystallization. The resulting product (1.61 mmol, 372 mg) was obtained as orange solid in 89% yield. HRMS (FAB+) calcd for C<sub>10</sub>H<sub>10</sub>N: 144.0813; found, 144.0811

<sup>1</sup>H NMR 4.47 (s, 3H) 8.06 (t, J=7.8 Hz, 1H) 8.24 (t, J=7.5 Hz, 1H) 8.33 (d, J=8.1 Hz, 1H) 8.46 (d, J=8.1 Hz, 1H) 8.54 (d, J=6.6 Hz, 1H), 8.69 (d, J=6.6 Hz, 1H) 9.97 (s, 1H) <sup>13</sup>C NMR δ 48.33 125.84 127.48 127.66 130.59 131.60 136.30 137.05 137.14 151.13

### 1,3-dimethylimidazolium tetrafluoroborate

Aqueous tetrafluoroboric acid (1.82 mmol, 0.237 mL) was added to imidazole (1.82 mmol, 124 mg) in at 0 °C and water was removed under reduced pressure using phosphorus pentoxide. And then trimethyl orthoformate (9.1 mmol, 1 mL) was added to the residue. The reaction mixture was heated to 110 °C for 20 h. After the reaction, triethyl orthoformate was removed under reduced pressure. Residue was dissolved in ethyl acetate and methanol and the mixture was filtered through basic alumina. Solvent was removed under reduced pressure and then the resulting product (1.54 mmol, 284 mg) was collected in 84% yield.

<sup>1</sup>H NMR δ 3.84 (s, 6H) 7.64 (s, 2H) 8.99 (s, 1H) <sup>13</sup>C NMR δ 36.28 124.08 137.64

### 1,3-diethylimidazolium tetrafluoroborate

Aqueous tetrafluoroboric acid (1.82 mmol, 0.237 mL) was added to imidazole (1.82 mmol, 124 mg) at 0 °C and water was removed under reduced pressure using phosphorus pentoxide. And then triethyl orthoformate (9.1 mmol, 1.5 mL) was added to the residue. The reaction mixture was heated to 130 °C for 20 h. After the reaction, triethyl orthoformate was removed under reduced pressure. Residue was dissolved in ethyl acetate and methanol and the mixture was filtered through basic alumina. Solvent was removed under reduced pressure and then the resulting product (1.54 mmol, 284 mg) was collected in 68% yield. HRMS (FAB+) calcd for C<sub>7</sub>H<sub>13</sub>N<sub>2</sub>: 125.1079; found, 125.1079

<sup>1</sup>H NMR 1.42 (t, J= 7.5 Hz, 6H), 4.17 (q, J=7.5 Hz, 4H) 7.80 (s, 2H) 9.16 (s, 1H) <sup>13</sup>C NMR δ15.45 44.62 122.54 135.80

### 1,3-diisopropylimidazolium tetrafluoroborate

Aqueous tetrafluoroboric acid (1.82 mmol, 0.237 mL) was added to imidazole (1.82 mmol, 124 mg) at 0 °C and water was removed under reduced pressure using phosphorus pentoxide. And then triisopropyl orthoformate (9.1 mmol, 1.5 mL) was added to the residue. The reaction mixture was heated to 130 °C for 48 h. After the reaction, triisopropyl orthoformate was removed under reduced pressure. Recrystallization was performed in the presence of ethyl acetate and the resulting product (0.57 mmol, 137 mg) was collected in 31% yield. HRMS (FAB+) calcd for C<sub>9</sub>H<sub>17</sub>N<sub>2</sub>: 153.1392; found, 153.1393

<sup>1</sup>H NMR 1.47 (d, J= 6.9 Hz, 12H), 4.60 (septet, J=6.9 Hz, 2H) 7.91 (s, 2H) 9.23 (s, 1H) <sup>13</sup>C NMR δ22.73 52.69 121.08 133.94

### 1,3-diethylimidazolium 4-methylbenzenesulfonate

1-butylimidazole (1.82 mmol, 124 mg) and *p*-toluenesulfonic acid (1.82 mmol, 346 mg) was mixed with triethyl orthoformate (9.1 mmol, 1.5 mL). The reaction mixture was heated to 130 °C for 24 h. After the reaction, triethyl orthoformate was removed under reduced pressure. Residue was dissolved in dichloromethane and the mixture was filtered through basic alumina. Solvent removed under reduced pressure and then the resulting product (1.61 mmol, 479 mg) was collected in 89% yield. HRMS (FAB+) calcd for C<sub>7</sub>H<sub>13</sub>N<sub>2</sub>: 125.1079; found, 125.1076

<sup>1</sup>H NMR 1.38 (t, J= 7.5 Hz, 6H), 2.28 (s, 3H) 4.16 (q, J=7.5 Hz, 4H) 7.13 (d, J=6.9 Hz, 2H) 7.53 (d, J=6.9 Hz, 2H) 7.82 (s, 2H) 9.29 (s, 1H) <sup>13</sup>C NMR δ15.50 21.20 44.55 122.53 125.89 128.61 135.98 138.29 145.98

## 2.3 TGA data for [BMIM][BF<sub>4</sub>]

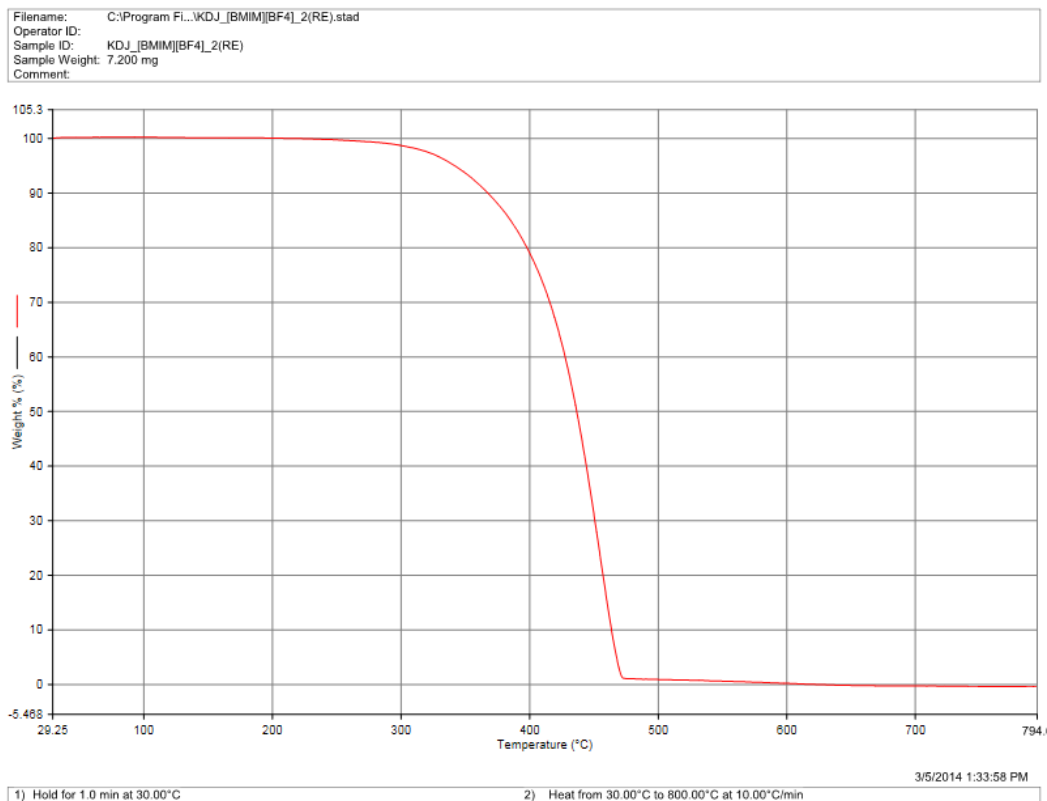

Synthesized [BMIM][BF<sub>4</sub>] from HBF<sub>4</sub>

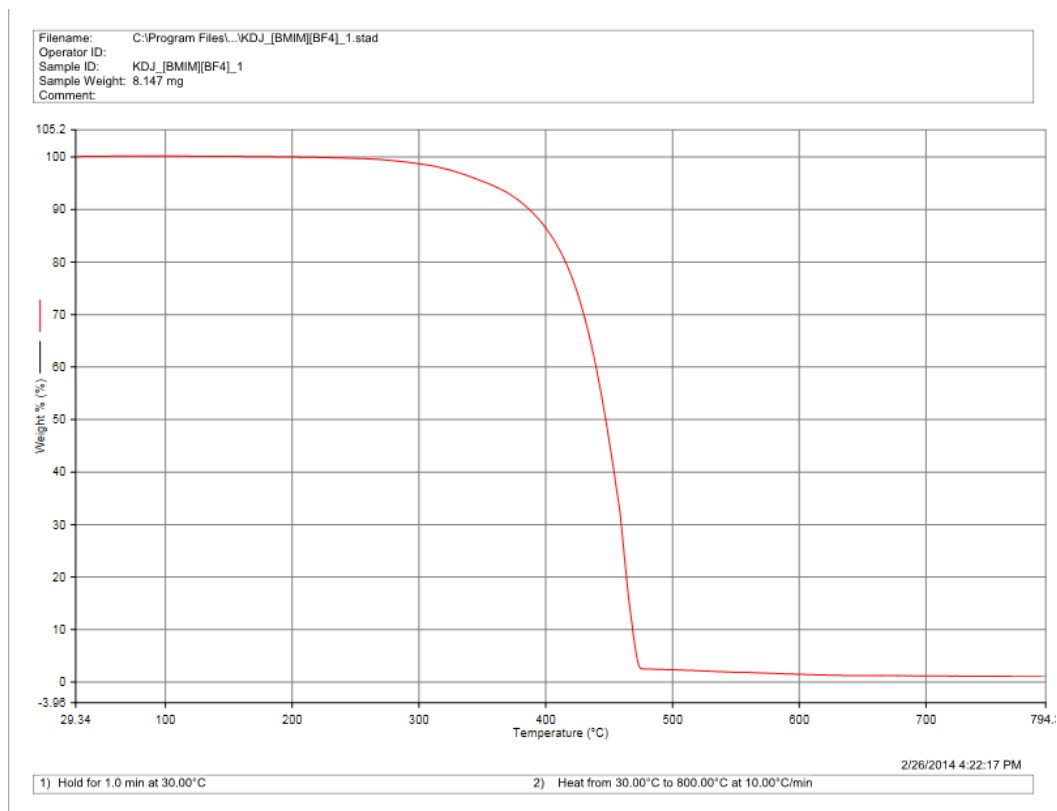

Commercial [BMIM][BF<sub>4</sub>] (c-tri)

## 2.4 Ion chromatography

\* Reagents and Standards: Deionized water, 18 M $\Omega$ -cm, Chloride Standard, 100 mg/L (seven anion standard II, Dionex)

\* Instrument: Dionex ICS-5000 system

\* Column: Analytical column AS15(Dionex, USA) (4x250mm), Guard column AS15 (Dionex, USA) (4x50mm)

\* Flow : 1.5mL/min

\* Eluent 32mM KOH

\* Temperature: 35 °C

\* Sampling: [BMIM]Br (from NH<sub>4</sub>Br): 0.1408 g [BMIM]I (from NH<sub>4</sub>I): 0.1375 g  
 [BMIM]BF<sub>4</sub> (from HBF<sub>4</sub>): 0.9285 g [BMIM]BF<sub>4</sub> (from NH<sub>4</sub>BF<sub>4</sub>): 0.9312 g  
 [BMIM]BF<sub>4</sub> (C-TRI): 0.9905 g [BMIM]NO<sub>3</sub> (from HNO<sub>3</sub>): 0.7103 g  
 [BMIM]NO<sub>3</sub> (from NH<sub>4</sub>NO<sub>3</sub>): 0.7092 g [BMIM]N(Tf)<sub>2</sub> (from HN(Tf)<sub>2</sub>): 0.2871 g  
 [BMIM]OTf (from TsOH): 0.1204 g [BMIM]OTf (from TfOH): 0.4962 g

### (1) Calibration results for chloride and chromatogram of standard solution

| *Cl calibration : 0.01, 0.05, 0.1, 0.5, 1, 5, 10 ppm |                                |                 |          |          |             |          |            |
|------------------------------------------------------|--------------------------------|-----------------|----------|----------|-------------|----------|------------|
|                                                      |                                |                 |          |          |             |          |            |
|                                                      | Calibration Batch Report       |                 |          |          |             |          |            |
|                                                      |                                |                 |          |          |             |          |            |
| Sequence:                                            | organic acid_20140519-RA_Anion |                 |          |          | Injection V | 5,000.00 |            |
| Instrument Met                                       | organic acid_20130613          |                 |          |          | Operator:   | user     |            |
| Inj. Date / Time                                     | 19-5-2012 / 22:14              |                 |          |          | Run Time:   | 32.00067 |            |
|                                                      |                                |                 |          |          |             |          |            |
| Calibration Summary                                  |                                |                 |          |          |             |          |            |
| Peak Name                                            | Eval.Type                      | Cal.Type        | Points   | Offset   | Slope       | Curve    | Coeff.Det. |
|                                                      |                                |                 |          |          |             |          |            |
|                                                      |                                |                 |          | (C0)     | (C1)        | (C2)     | %          |
| Fluoride                                             | Area                           | Lin, WithOffset | 7        | -0.008   | 0.27        | 0        | 99.7963    |
| *Chloride                                            | Area                           | Lin, WithOffset | 7        | -0.007   | 0.201       | 0        | 99.9895    |
| Nitrite                                              | Area                           | Lin, WithOffset | 7        | -0.009   | 0.136       | 0        | 99.9779    |
| Sulfate                                              | Area                           | Lin, WithOffset | 7        | -0.018   | 0.149       | 0        | 99.8193    |
| Bromide                                              | Area                           | Lin, WithOffset | 6        | -0.012   | 0.08        | 0        | 99.8572    |
| Nitrate                                              | Area                           | Lin, WithOffset | 6        | -0.018   | 0.111       | 0        | 99.4542    |
| Phosphate                                            | Area                           | Lin, WithOffset | 5        | 0.87     | -0.051      | 0        | 55.1178    |
|                                                      |                                | AVERAGE:        |          | 0.1136   | 0.1285      | 0        | 93.3577    |
|                                                      |                                |                 |          |          |             |          |            |
| Injection Name                                       | Ret.Time                       | Area            | Height   | Amount   |             |          |            |
|                                                      | min                            | mS*min          | mS       |          |             |          |            |
| Chloride                                             | Chloride                       | Chloride        | Chloride | Chloride |             |          |            |
|                                                      | CD_1                           | CD_1            | CD_1     | CD_1     |             |          |            |
| Std-0.01                                             | 12.911                         | 0.0023          | 0.012    | 0.047    |             |          |            |
| Std-0.05                                             | 12.897                         | 0.0093          | 0.049    | 0.082    |             |          |            |
| Std-0.1                                              | 12.897                         | 0.0167          | 0.091    | 0.119    |             |          |            |
| Std-0.5                                              | 12.894                         | 0.0909          | 0.485    | 0.488    |             |          |            |
| Std-1                                                | 12.894                         | 0.1812          | 1.011    | 0.939    |             |          |            |
| Std-5                                                | 12.881                         | 0.9856          | 5.427    | 4.947    |             |          |            |
| Std-10                                               | 12.881                         | 2.0041          | 11.061   | 10.023   |             |          |            |
| Average                                              | 12.893                         |                 |          |          |             |          |            |
| Rel. Std. Dev.                                       | 0.08%                          |                 |          |          |             |          |            |



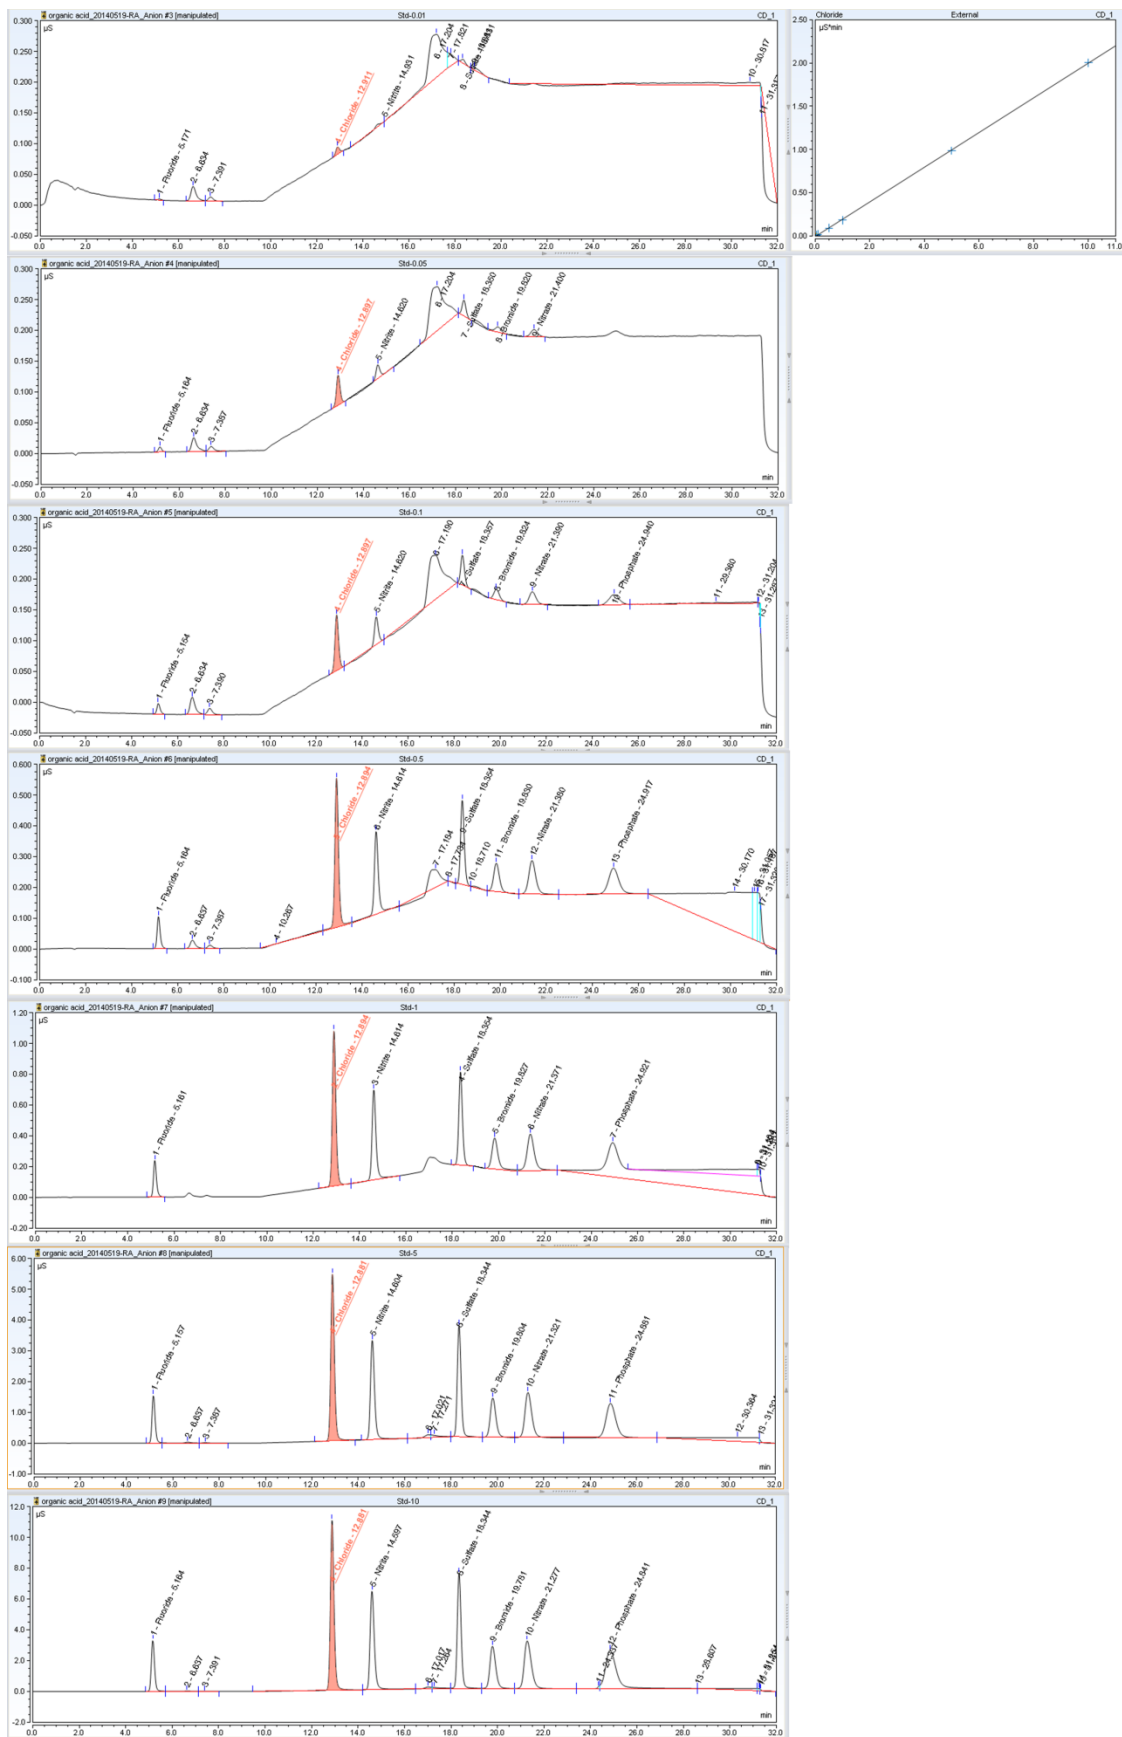

## (2) Chromatogram

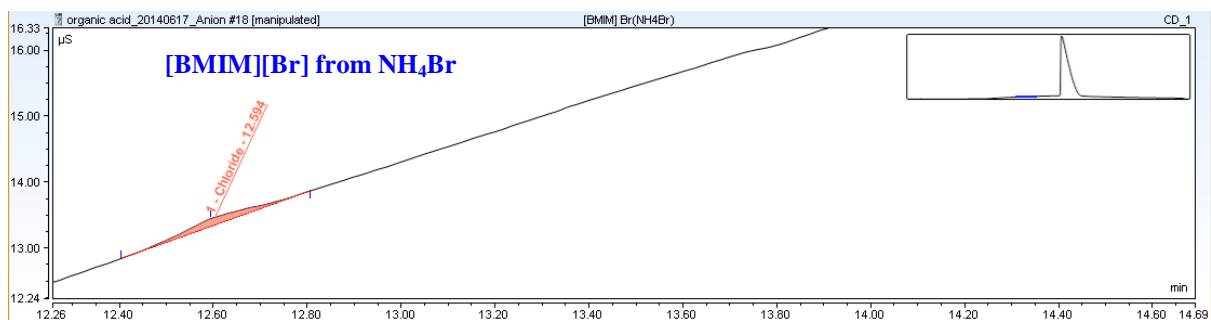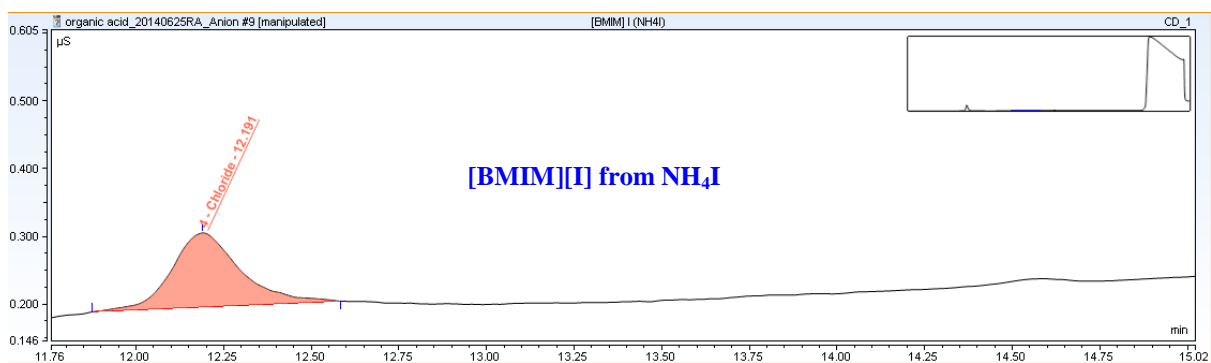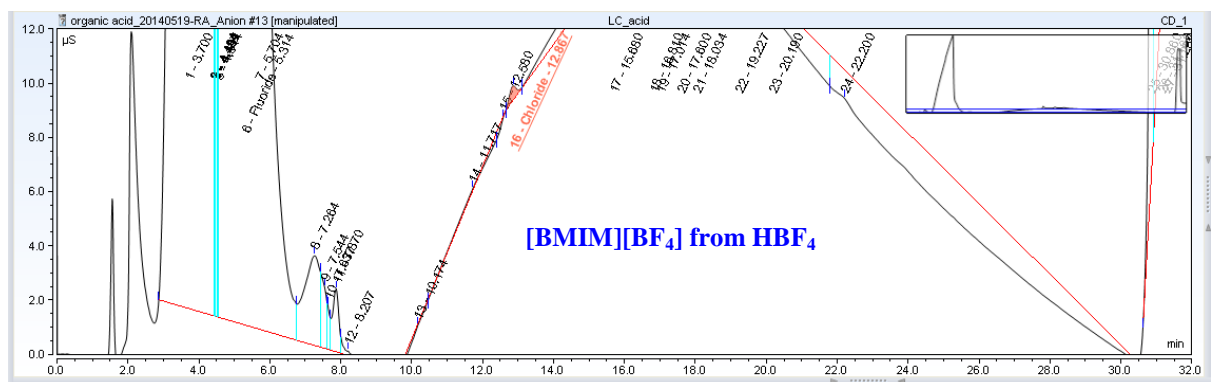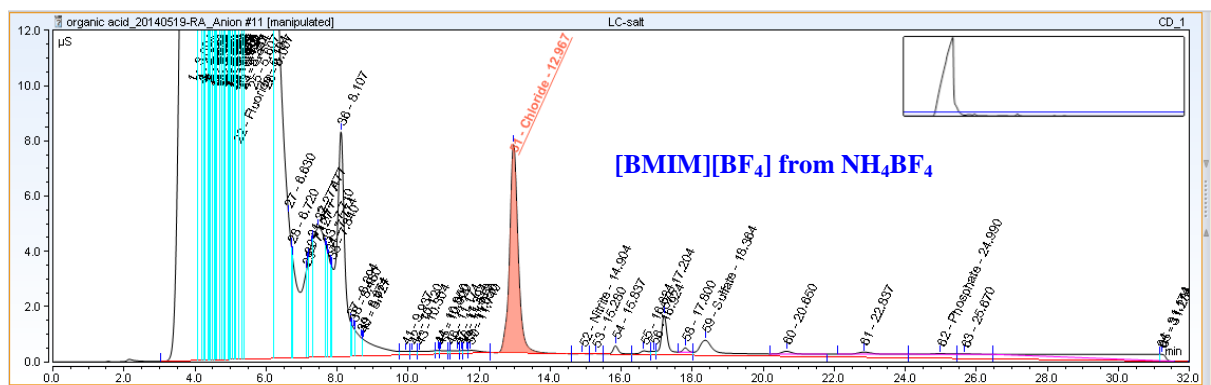

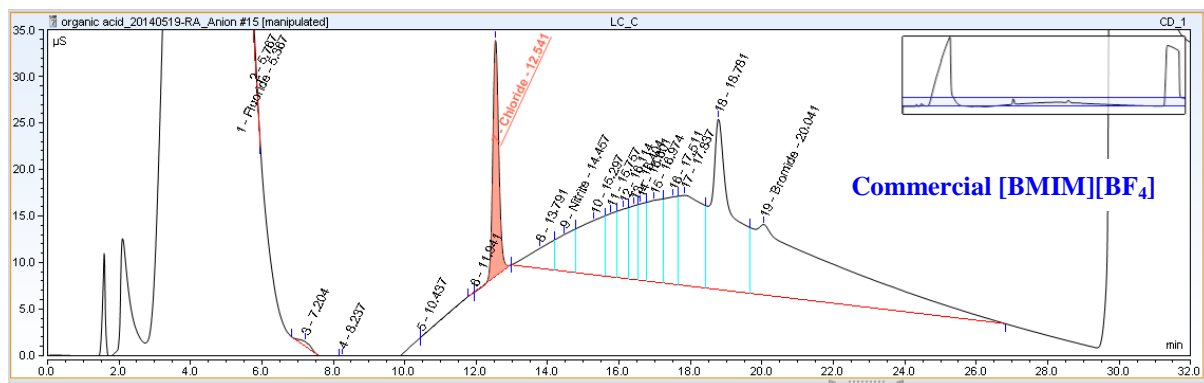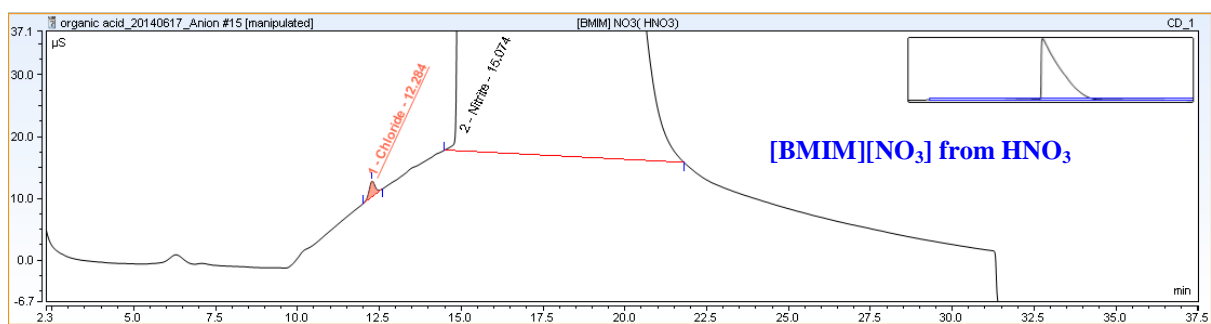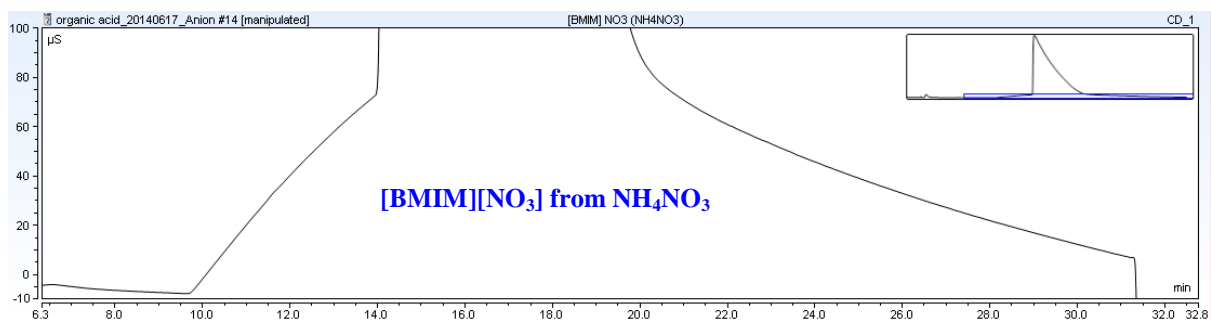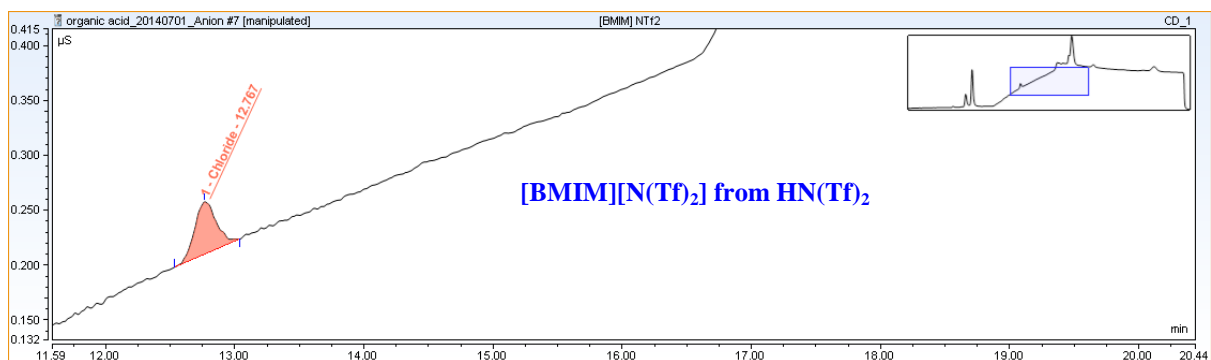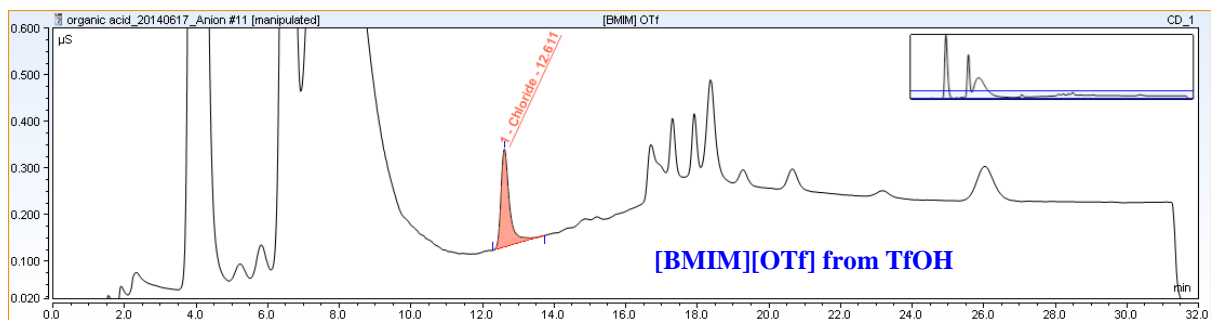

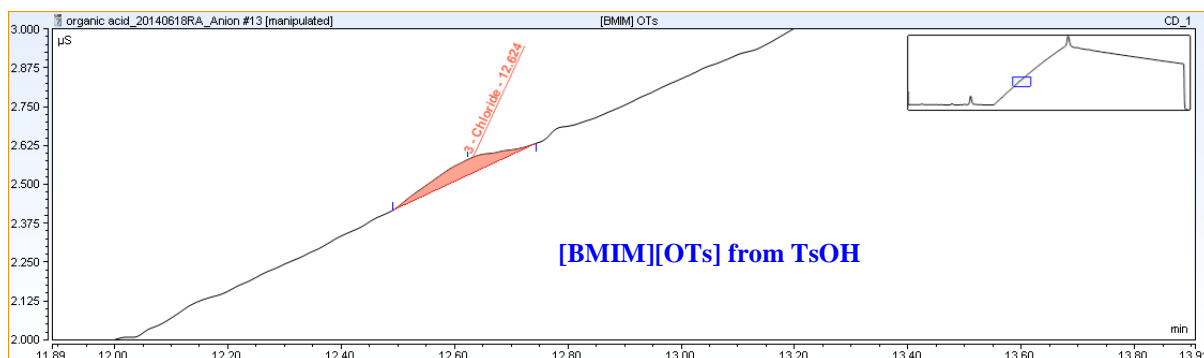

### (3) Cl content table

| Name                                                     | Time   | Area   | Rel.Area | Height | Rel.Height | Amount  | dilution factor | ppm             |
|----------------------------------------------------------|--------|--------|----------|--------|------------|---------|-----------------|-----------------|
| [BMIM]Br (NH <sub>4</sub> Br)                            | 12.594 | 0.0194 | 100      | 0.12   | 100        | 0.1462  | 72.5447         | <b>10.6082</b>  |
| [BMIM]I (NH <sub>4</sub> I)                              | 12.191 | 0.0247 | 0.96     | 0.11   | 0.87       | 0.1916  | 43.0938         | <b>8.2568</b>   |
| [BMIM]BF <sub>4</sub> (HBF <sub>4</sub> )                | 12.867 | 0.1196 | 0.02     | 0.52   | 0.03       | 0.6314  | 10.6328         | <b>6.7138</b>   |
| [BMIM]BF <sub>4</sub> (NH <sub>4</sub> BF <sub>4</sub> ) | 12.967 | 2.1158 | 0.57     | 7.57   | 0.17       | 10.5795 | 13.5888         | <b>143.7632</b> |
| [BMIM]BF <sub>4</sub> (C-TRI)                            | 12.541 | 4.8312 | 3.67     | 25.45  | 8.45       | 24.1119 | 10.0617         | <b>242.6070</b> |
| [BMIM]NO <sub>3</sub> (HNO <sub>3</sub> )                | 12.284 | 0.5308 | 0.02     | 2.53   | 0.18       | 2.4603  | 10.6014         | <b>26.0826</b>  |
| [BMIM]NO <sub>3</sub> (NH <sub>4</sub> NO <sub>3</sub> ) | n.a.   | n.a.   | n.a.     | n.a.   | n.a.       | n.a.    | n.a.            | <b>n.a.</b>     |
| [BMIM]NTf <sub>2</sub> (NTf <sub>2</sub> )               | 12.767 | 0.0092 | 8.74     | 0.05   | 12.74      | 0.0753  | 24.7739         | <b>1.8664</b>   |
| [BMIM]OTf (TfOH)                                         | 12.611 | 0.0254 | 1.06     | 0.08   | 1.05       | 0.1954  | 11.4913         | <b>2.2453</b>   |
| [BMIM]OTs (TsOH)                                         | 12.624 | 0.0072 | 1.98     | 0.05   | 3.76       | 0.0994  | 93.7987         | <b>9.3236</b>   |

## 2.5 High resolution mass spectra

### ESI-negative

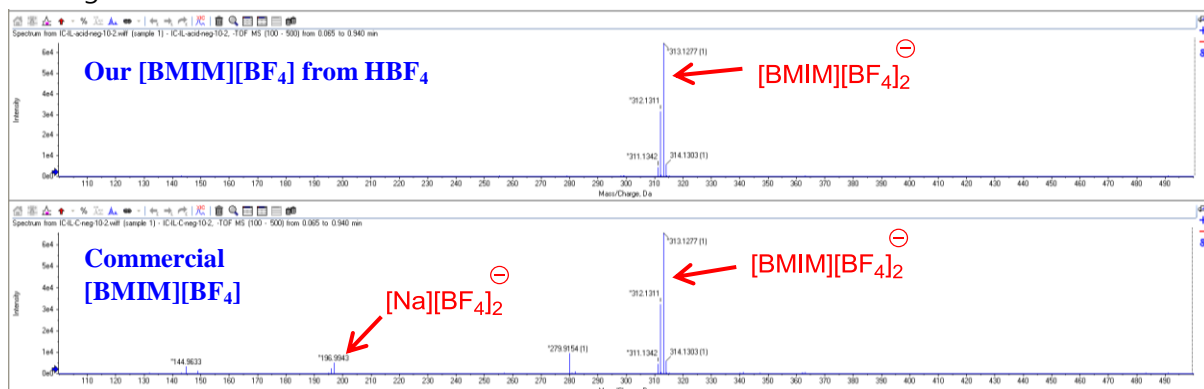

## ESI-positive

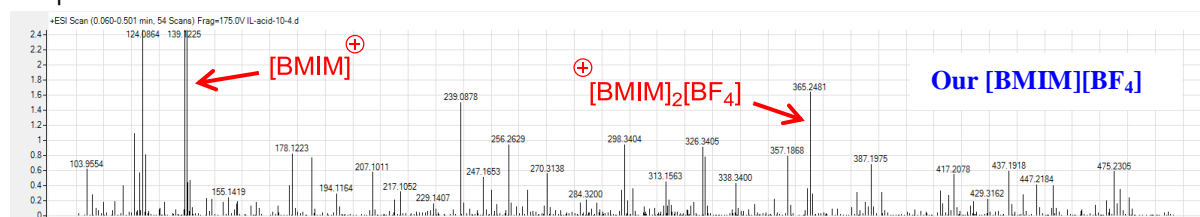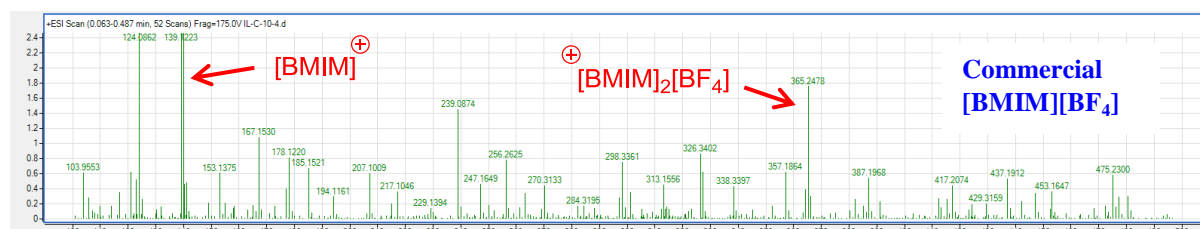

## 3. References

1. J. Vitz, T. Erdmenger, C. Haensch, U. S. Schubert, *Green Chem.* **2009**, *11*, 417.
2. J. G. Huddleston, A. E. Visser, W. M. Reichert, H. D. Willauer, G. A. Broker, R. D. Rogers, *Green Chem.* **2001**, *3*, 156.
3. W. Xu, L.-M. Wang, R. A. Nieman, C. A. Angell, *J. Phys. Chem. B*, **2003**, *107*, 11749
4. P. D. Vu, A. J. Boydston, C. W. Bielawski, *Green Chem.*, **2007**, *9*, 1158
5. M. Smiglak, J. D. Holbrey, S. T. Griffin, W. M. Reichert, R.P. Swatloski, A. R. Katritzky, H. Yang, D. Zhang, K. Kirichenko, R. D. Rogers, *Green Chem.* **2007**, *9*, 90
6. S. Petit, R. Azzouz, C. Fruit, L. Bischoff, F. Marsais, *Tetrahedron lett.* **2008**, *49*, 3663
7. D. Zhao, Z. Fei, T. J. Geldbach, R. Scopelliti, G. Laurenczy, P. J. Dyson, *Helv. Chim. Acta.* **2005**, *88*, 665
8. M. P. Stracke, G. Ebeling, R. Cataluña, J. Dupont, *Energy Fuels*, **2007**, *21*, 1695
9. R. N. Nadaf, S. A. Siddiqui, T. Daniel, R. J. Lahoti, K.V. Srinivasan, *J. Mol. Catal. A: Chem.* **2004**, *214*, 155
10. H. Srour, H. Rouault, C. C. Santini, Y. Chauvin, *Green Chem.* **2013**, *15*, 1341.

## 4. Spectral data

### 1-butyl-3-methylimidazolium bromide

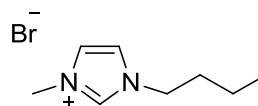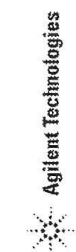

bmimbr

Sample Name:

Archive directory:

Sample directory:

FidFile: BMIMBr\_final\_H

Pulse Sequence: std1h (s2pul)

Solvent: DMSO

Data collected on: Oct 29 2013

Operator: laputa20

VNMRS-300 "Agilent-NMR"

Relax. delay 1.000 sec

Pulse 45.0 degrees

Acq. time 1.998 sec

Width 4500.5 Hz

20 repetitions

OBSERVE H1, 300.1143883 MHz

DATA PROCESSING

Ft size 32768

Total time 6 min 24 sec

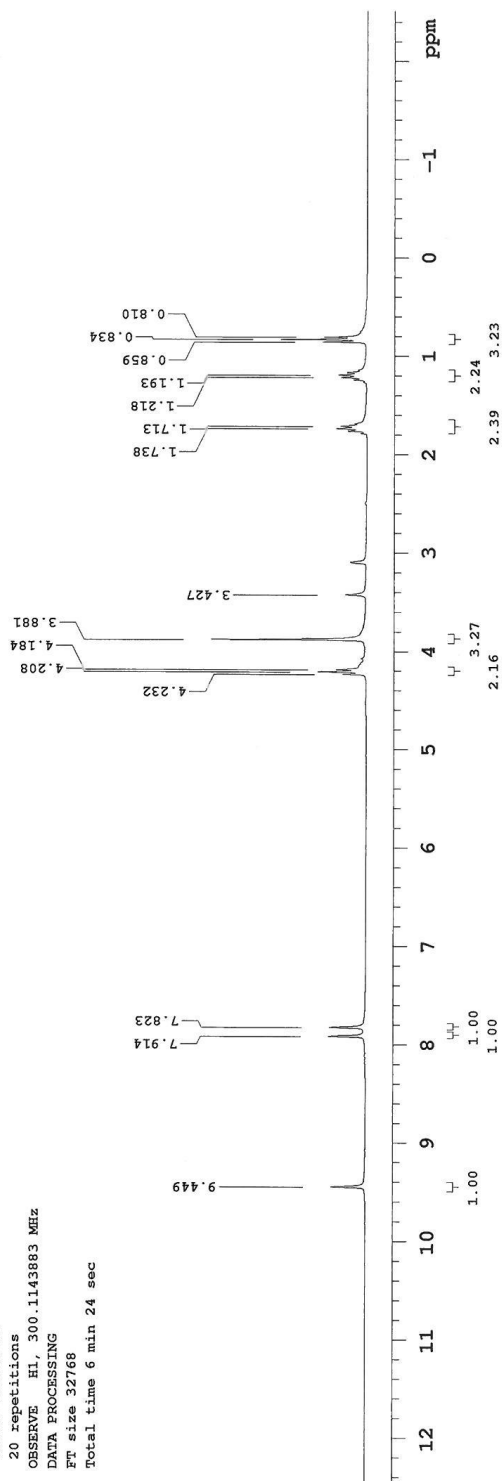

EMIMBr

Sample Name:

Archive directory:

Sample directory:

FidFile: EMIMBr\_final\_C

Pulse Sequence: std13c (s2pul)

Solvent: DMSO

Data collected on: Oct 29 2013

Operator: laputa20

VNMRS-300 "Agilent-NMR"

Relax. delay 1.000 sec

Pulse 103.8 degrees

Acq. time 1.815 sec

Width 18761.7 Hz

56 repetitions

OBSERVE C13, 75.4638242 MHz

DECOUPLE H1, 300.1159538 MHz

Power 44 dB

on during acquisition

off during delay

WALTZ-16 modulated

DATA PROCESSING

Line broadening 1.0 Hz

FT size 131072

Total time 48 min

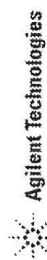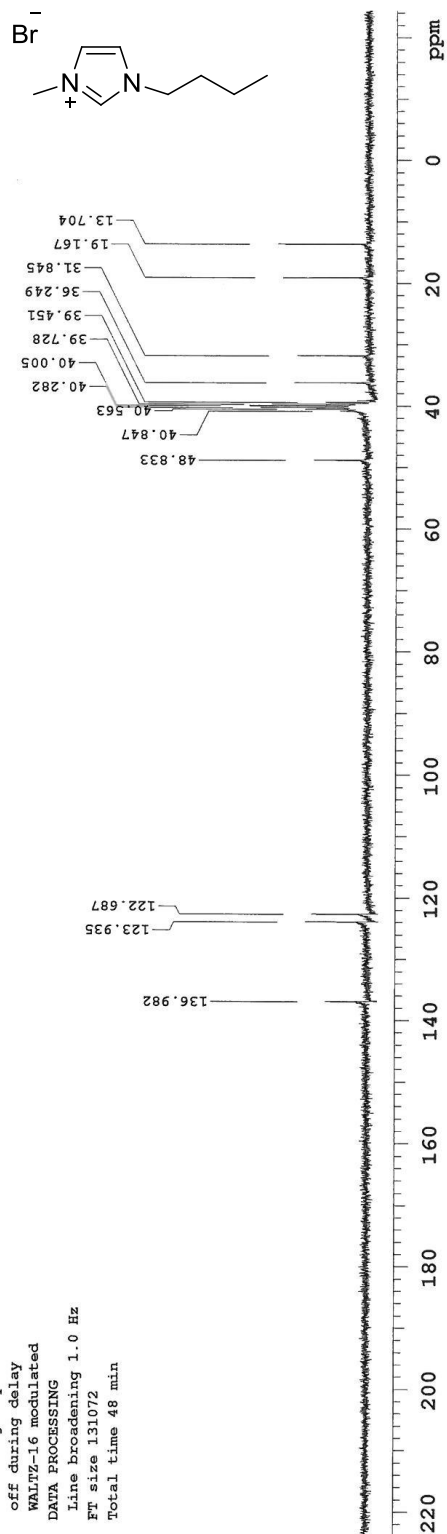

# 1-butyl-3-methylimidazolium iodide

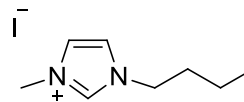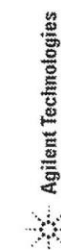

FP\_butyl\_methyl\_i  
 Sample Name:  
 Archive directory:  
 Sample directory:  
 FidFile: FP\_butyl\_methyl\_i  
 Pulse Sequence: stdlh (s2pul)  
 Solvent: DMSO  
 Data collected on: Jan 7 2014  
 Operator: laputa20  
 VNMR-300 "Agilent-NMR"  
 Relax. delay 1.000 sec  
 Pulse 45.0 degrees  
 Acq. time 1.998 sec  
 Width 4500.5 Hz  
 4 repetitions  
 OBSERVE H1, 300.1143880 MHz  
 DATA PROCESSING  
 F1 size 32768  
 Total time 6 min 24 sec

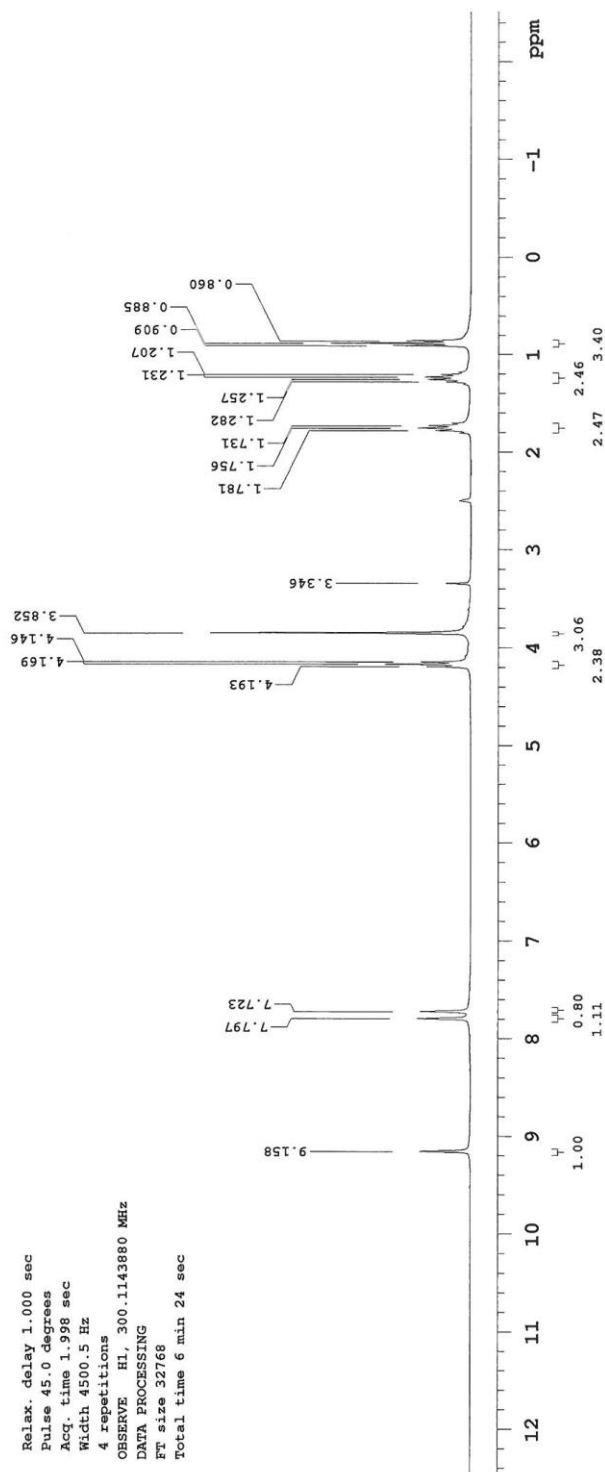



FP\_buty\_methyl\_I\_C  
 Pulse Sequence: s2pul  
 Solvent: DMSO  
 Ambient temperature  
 Observed nucleus: <sup>13</sup>C  
 Mercury-300BB "PNUCHEM"  
 Relax. delay 1.000 sec  
 Pulse 103.8 degrees  
 Acq. time 1.815 sec  
 Width 18761.7 Hz  
 1024 repetitions  
 OBSERVE C13, 75.4638082 MHz  
 DECOUPLE H1, 300.1153538 MHz  
 Power 44 dB, 300.1153538 MHz  
 on during acquisition  
 off during delay  
 WALTZ-16 modulated  
 DATA PROCESSING  
 Line broadening 1.0 Hz  
 F1 size 131072  
 Total time 1 hr, 6 min, 44 sec

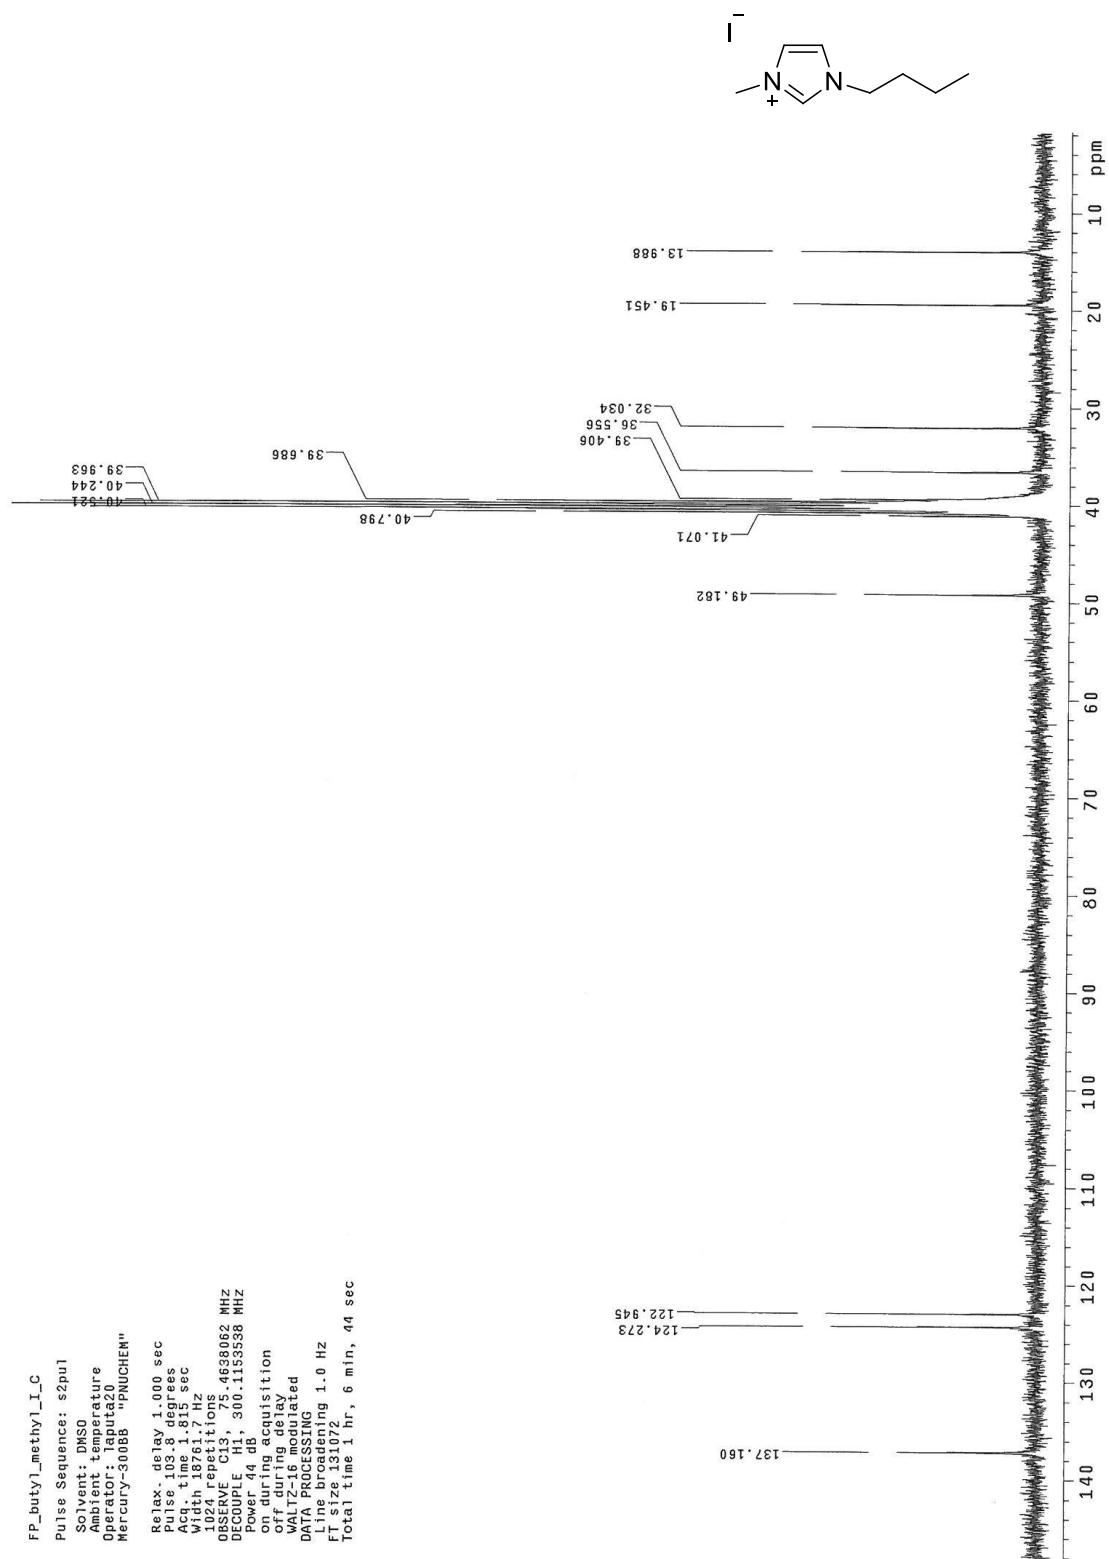

# 1-butyl-3-methylimidazolium nitrate

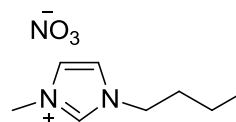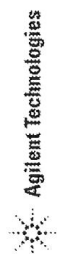

butyl\_methyl\_NO3

Sample Name:

Archive directory:

Sample directory:

FidFile: EMIMNO3\_final\_H

Pulse Sequence: stdlh (s2pul)

Solvent: DMSO

Data collected on: Oct 29 2013

Operator: laputa20

VNMRS-300 "Agilent-NMR"

Relax. delay 1.000 sec

Pulse 45.0 degrees

Acq. time 1.998 sec

Width 4500.5 Hz

24 repetitions

OBSERVE H1, 300.1143872 MHz

DATA PROCESSING

FT size 32768

Total time 6 min 24 sec

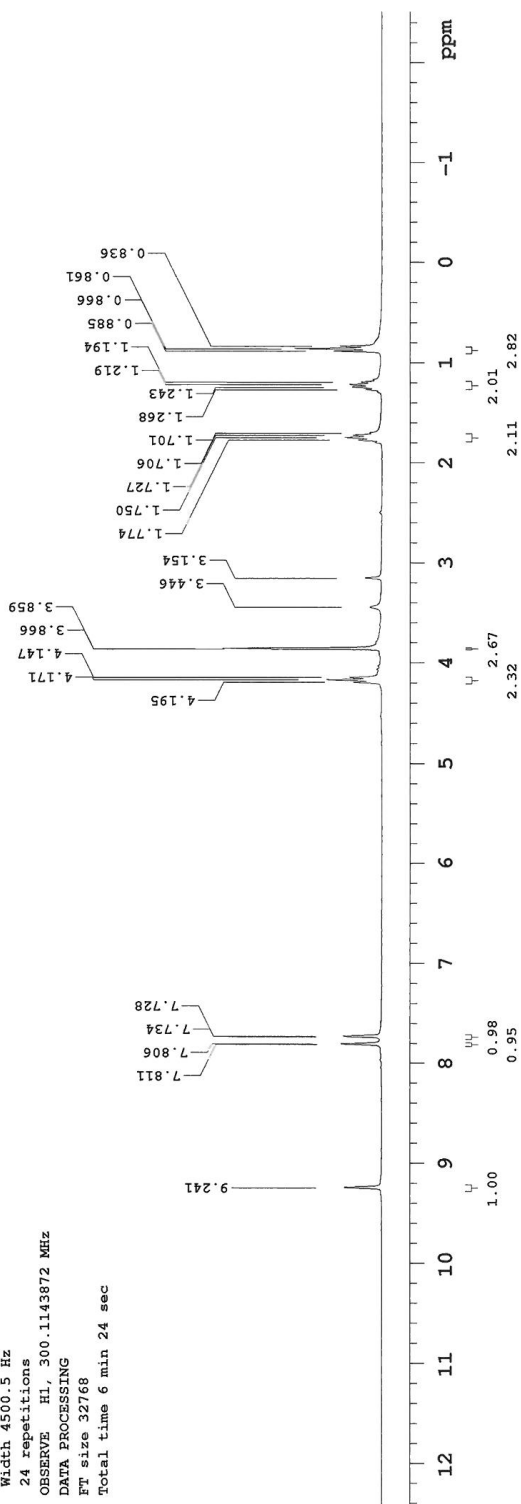

butyl\_methyl\_NO3

Sample Name:

Archive directory:

Sample directory:

FidFile: BMIMNO3\_final\_C

Pulse Sequence: std13c (s2pul)

Solvent: DMSO

Data collected on: Oct 29 2013

Operator: laputa20

VMRS-300 "Agilent-NMR"

Relax. delay 1.000 sec

Pulse 103.8 degrees

Acq. time 1.815 sec

Width 18761.7 Hz

24 repetitions

OBSERVE C13, 75.4638242 MHz

DECOUPLE H1, 300.1153538 MHz

Power 44 dB

on during acquisition

off during delay

WALTZ-16 modulated

DATA PROCESSING

Line broadening 1.0 Hz

Ft size 131072

Total time 48 min

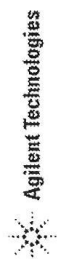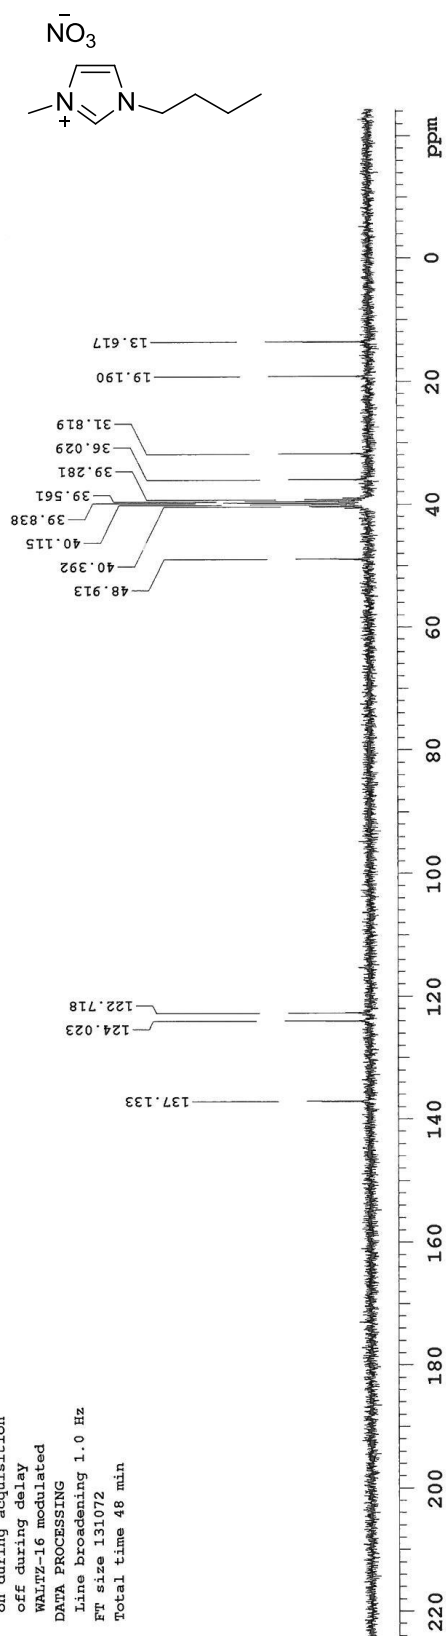

# 1-butyl-3-methylimidazolium tetrafluoroborate

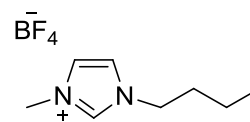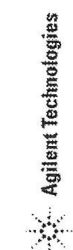

BMIM\_BF4

Sample Name:

Archive directory:

Sample directory:

FidFile: BMIMBF4\_final\_h

Pulse Sequence: stdlh (s2pul)

Solvent: DMSO

Data collected on: Oct 29 2013

Operator: laputa20

VNMR5-300 "Agilent-NMR"

Relax. delay 1.000 sec

Pulse 45.0 degrees

Acq. time 1.998 sec

Width 4500.5 Hz

16 repetitions

OBSERVE H1, 300.1143874 MHz

DATA PROCESSING

Ft size 32768

Total time 6 min 24 sec

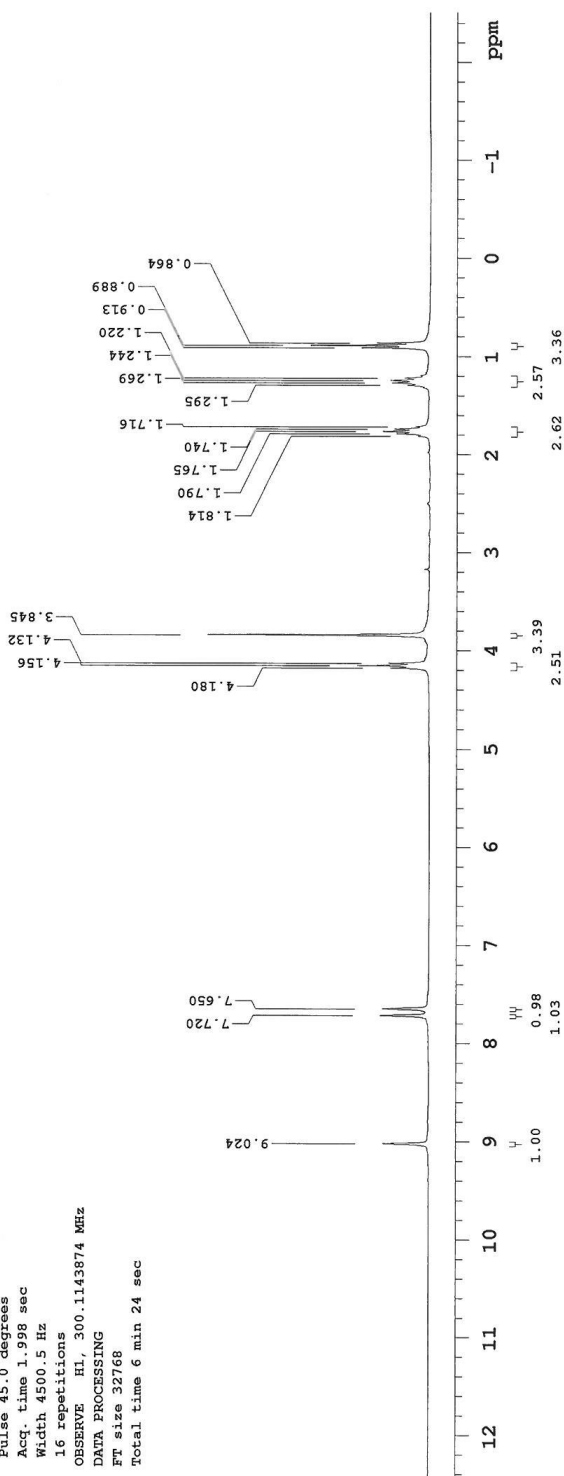

BMIM\_BF4

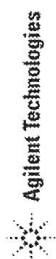

Sample Name:

Archive directory:

Sample directory:

FidFile: BMIMBF4\_final\_C

Pulse Sequence: std13c (s2pul)

Solvent: DMSO

Data collected on: Oct 29 2013

Operator: laputa20

VNMRS-300 "Agilent-NMR"

Relax. delay 1.000 sec

Pulse 103.8 degrees

Acq. time 1.815 sec

Width 18761.7 Hz

44 repetitions

OBSERVE C13, 75.4638242 MHz

DECOUPLE H1, 300.1153538 MHz

Power 44 dB

on during acquisition

off during delay

WALTZ-16 modulated

DATA PROCESSING

Line broadening 1.0 Hz

Ft size 131072

Total time 48 min

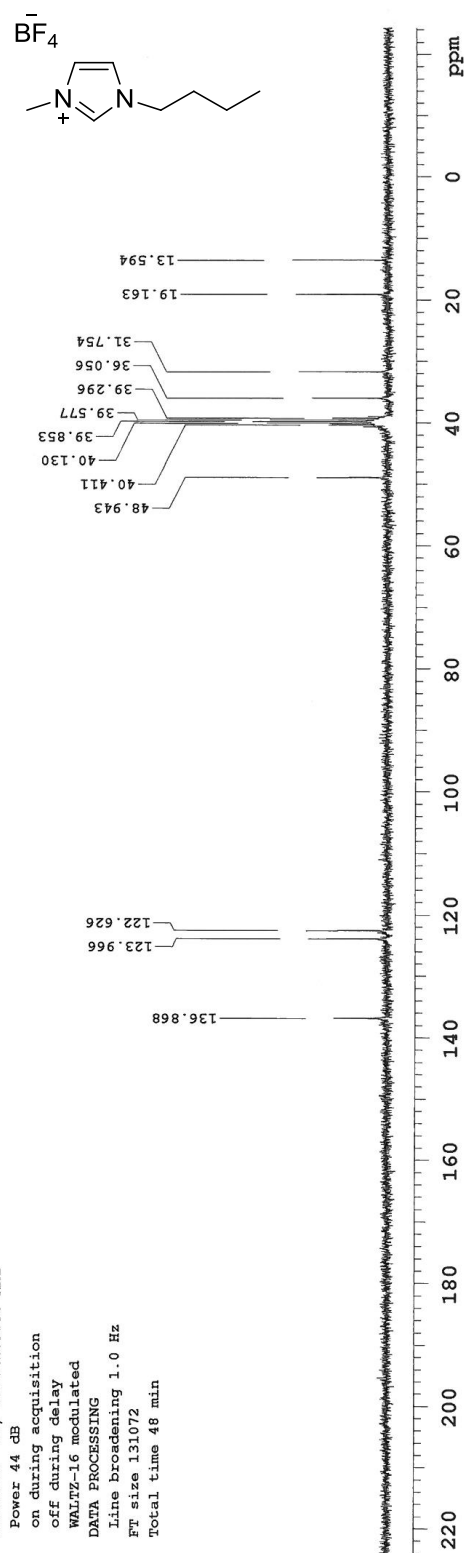

# 1-butyl-3-methylimidazolium hexafluorophosphate

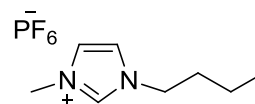

BMIM\_PPF6

Sample Name:

Archive directory:

Sample directory:

FidFile: BMIMPF6\_final\_H

Pulse Sequence: stdlh (s2pul)

Solvent: DMSO

Data collected on: Oct 29 2013

Operator: laputa20

VNMR-300 "Agilent-NMR"

Relax. delay 1.000 sec

Pulse 45.0 degrees

Acq. time 1.998 sec

Width 4500.5 Hz

12 repetitions

OBSERVE HL 300.1143877 MHz

DATA PROCESSING

FT size 32768

Total time 6 min 24 sec

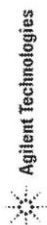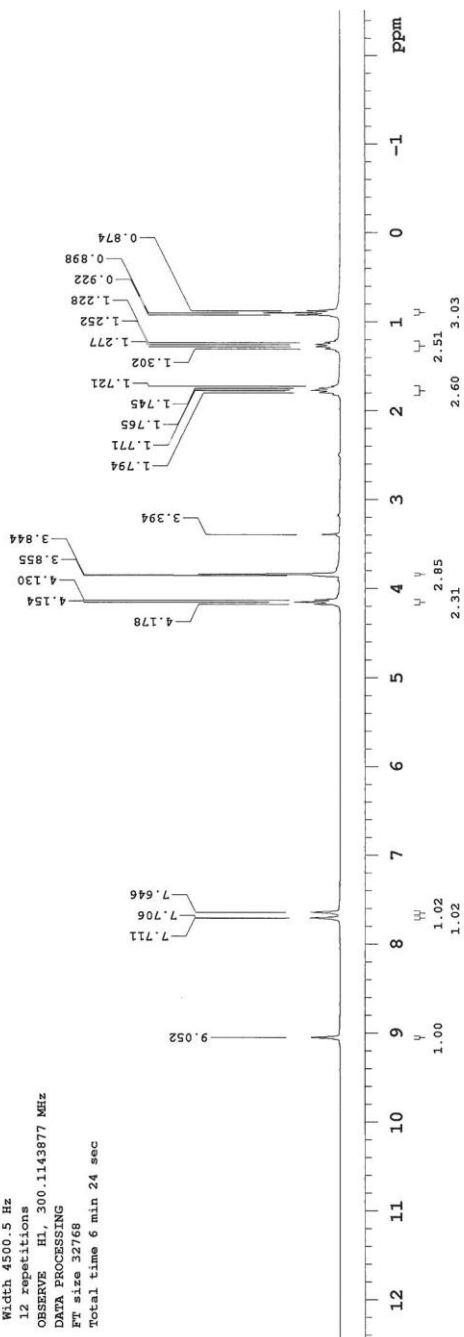

**<sup>13</sup>C OBSERVE**

Sample Name:

Archive directory:

Sample directory:

File: BMIMPF6\_Final\_C

Pulse Sequence: std13c (s2pul)

Solvent: DMSO

Data collected on: Oct 29 2013

Operator: laputa20

VNMRS-300 "Agilent-NMR"

Relax. delay 1.000 sec

Pulse 103.8 degrees

Acq. time 1.815 sec

Width 18761.7 Hz

60 repetitions

OBSERVE C13, 75.4638242 MHz

DECOUPLE H1, 300.1153538 MHz

Power 44 dB

on during acquisition

off during delay

WALTZ-16 modulated

DATA PROCESSING

Line broadening 1.0 Hz

FT size 131072

Total time 48 min

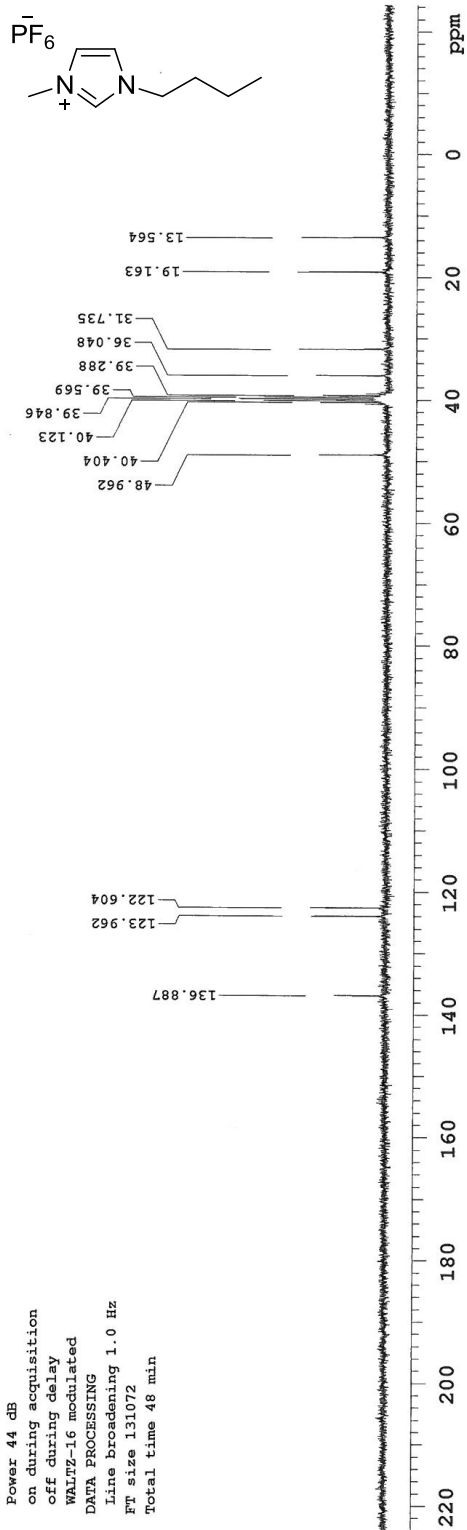

1-butyl-3-methylimidazolium bis(trifluoromethylsulfonyl)amide

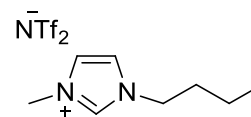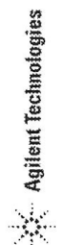

butyl\_methyl\_NTF2

Sample Name:  
Ethylindanone

Data Collected on:  
Agilent-NMR-vnmrs300

Archive directory:  
/home/vnmr1/vnmrsys/data/fidlib

Sample directory:  
Ethylindanone

FidFile: PROTON

Pulse Sequence: PROTON (s2pul)

Solvent: dmsc

Data collected on: Feb 2 2014

Operator: laputa20

Relax. delay 1.000 sec

Pulse 45.0 degrees

Acq. time 1.704 sec

Width 4807.7 Hz

Single scan

OBSERVE H1, 300.1143861 MHz

DATA PROCESSING

FT size 16384

Total time 0 min 3 sec

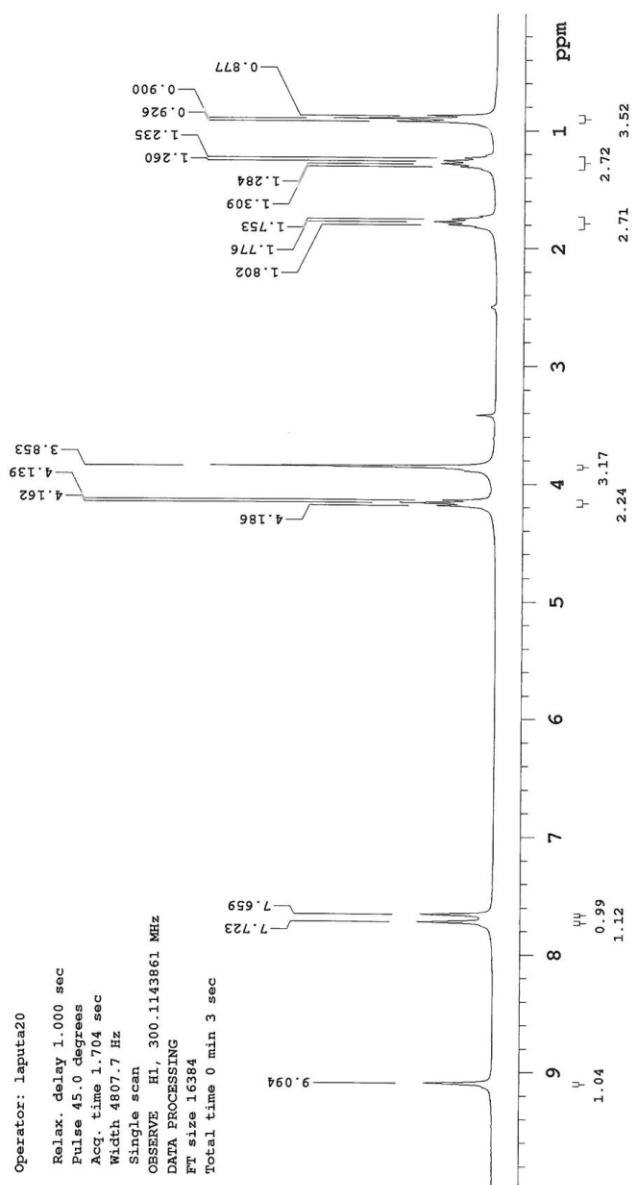



butyl\_methyl\_NTF2

Sample Name:  
Ethylindanone  
Data Collected on:  
Agilent-NMR-vnmrs300  
Archive directory:  
/home/vnmr1/vnmrsys/data/fidlib  
Sample directory:  
Ethylindanone  
FidFile: CARBON

Pulse Sequence: CARBON (s2pul)  
Solvent: dmsd  
Data collected on: Feb 2 2014

Temp. 17.1 C / 290.2 K  
Operator: laputa20

Relax. delay 1.000 sec  
Pulse 45.0 degrees  
Acq. time 0.865 sec  
Width 18939.4 Hz  
448 repetitions  
OBSERVE C13, 75.4638242 MHz  
DECOUPLE H1, 300.1158938 MHz  
Power 39 dB  
continuously on  
WALTZ-16 modulated  
DATA PROCESSING  
Line broadening 0.5 Hz  
FT size 32768  
Total time 31 min

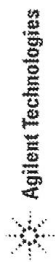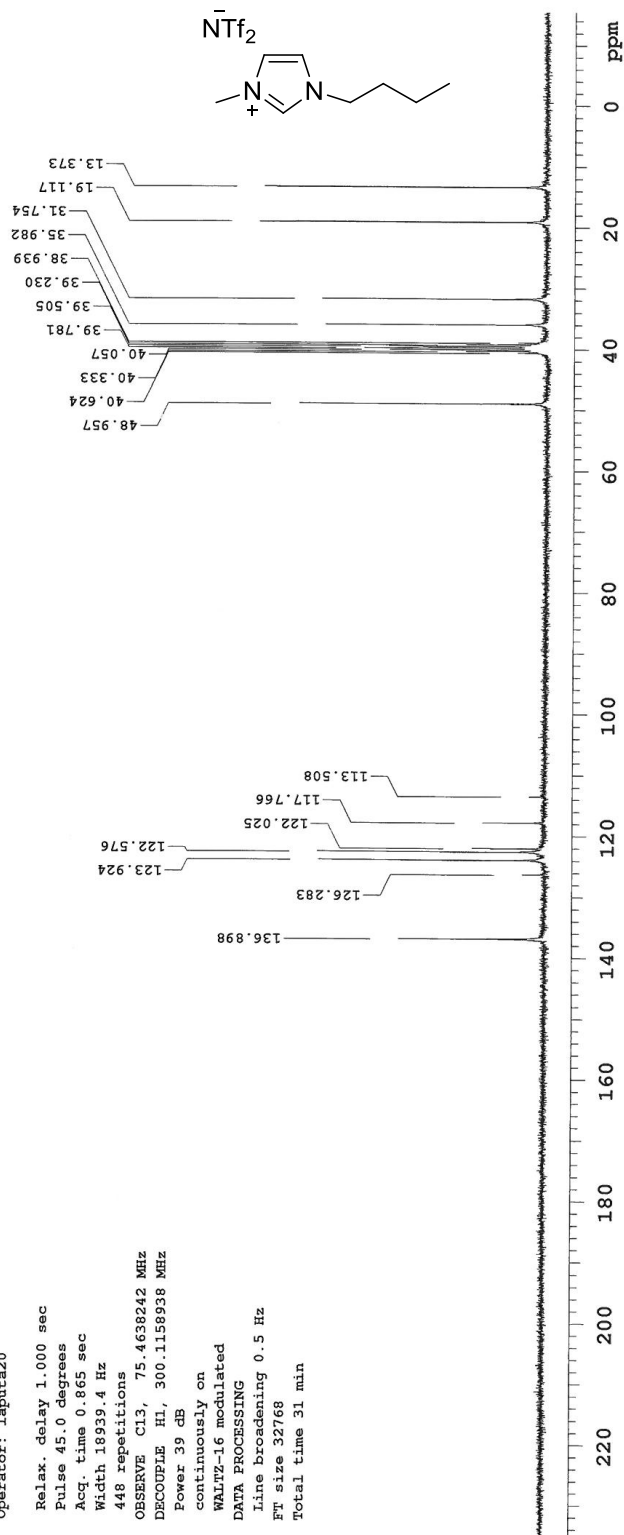

# 1-butyl-3-methylimidazolium trifluoromethanesulfonate

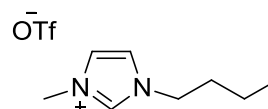

butyl\_methyl\_OTf

Sample Name:  
Ethylindaneone  
Data Collected on:  
Agilent-NMR-vnmrs300  
Archive directory:  
/home/vnmr1/vnmrsys/data/fidlib  
Sample directory:  
Ethylindaneone  
FidFile: PROTON

Pulse Sequence: PROTON (s2pul)  
Solvent: dmsd  
Data collected on: Feb 2 2014

Operator: laputa20

Relax. delay 1.000 sec  
Pulse 45.0 degrees  
Acq. time 1.704 sec  
Width 4807.7 Hz  
Single scan  
OBSERVE H1, 300.1143849 MHz  
DATA PROCESSING  
Ft size 16384  
Total time 0 min 3 sec

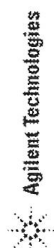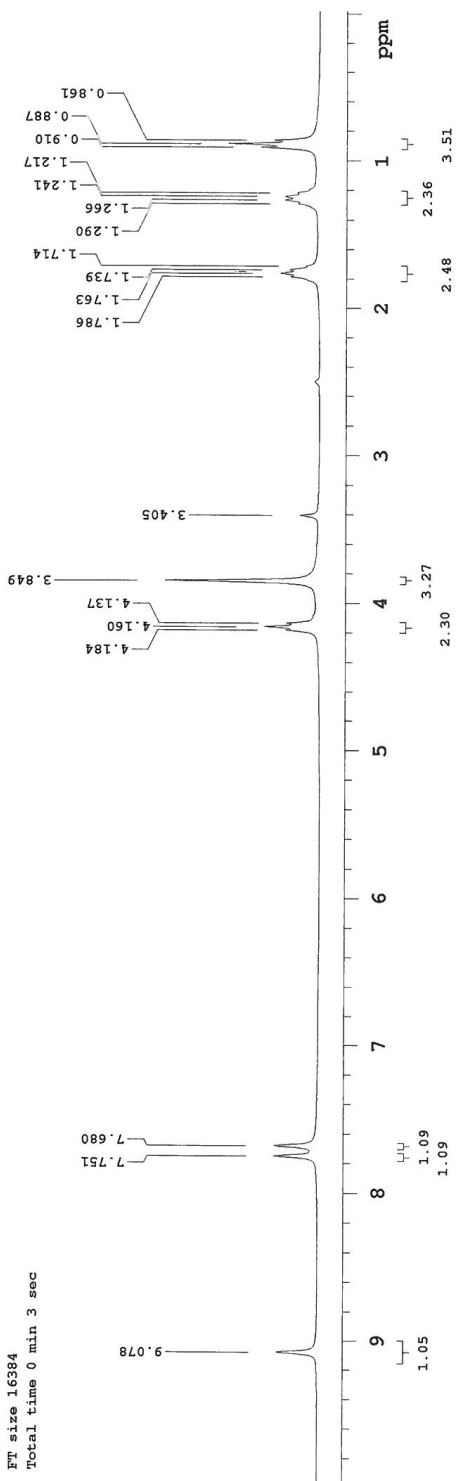

butyl\_methyl\_OTF

Sample Name:  
Ethylindanone  
Data Collected on:  
Agilent-NMR-vnmrs300  
Archive directory:  
/home/vnmr1/vnmrsys/data/fidlib  
Sample directory:  
Ethylindanone  
FidFile: butyl\_methyl\_OTF\_C

Pulse Sequence: CARBON (s2pul)  
Solvent: dmsd  
Data collected on: Feb 2 2014

Operator: laputa20

Relax. delay 1.000 sec  
Pulse 45.0 degrees  
Acq. time 0.865 sec  
Width 18939.4 Hz  
1024 repetitions  
OBSERVE C13, 75.4638242 MHz  
DECOUPLE H1, 300.1158938 MHz  
Power 39 dB  
continuously on  
WALTZ-16 modulated  
DATA PROCESSING  
Line broadening 0.5 Hz  
Ft size 32768  
Total time 31 min

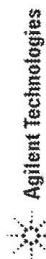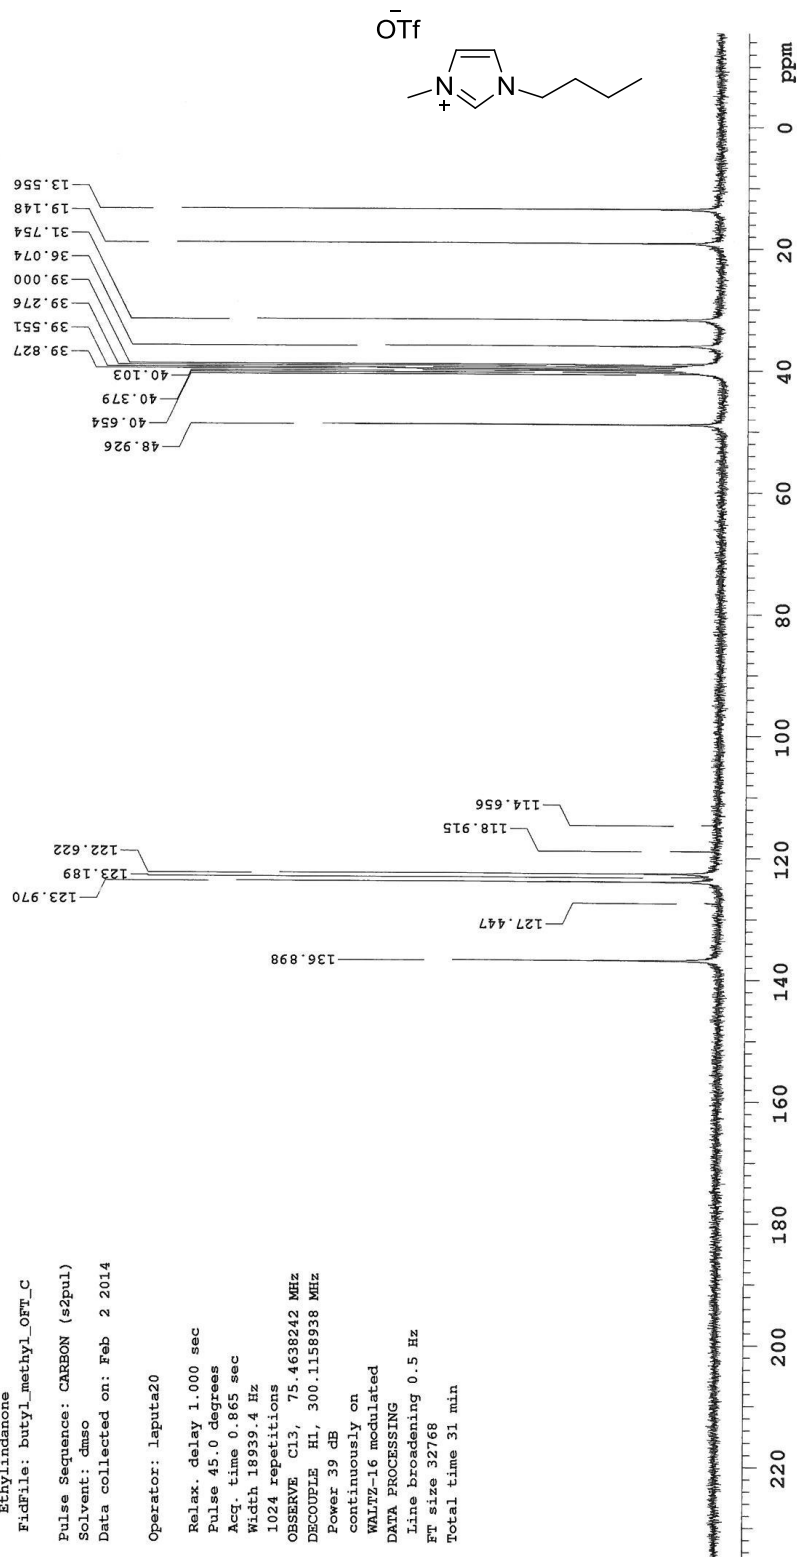

# 1-butyl-3-methylimidazolium 4-methylbenzenesulfonate

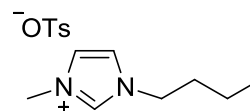

butyl\_methyl\_PTSA

Sample Name:  
Ethylindanone  
Data Collected on:  
Agilent-NMR-vnmr300  
Archive directory:  
/home/vnmr1/vnmr300/data/fidlib  
Sample directory:  
Ethylindanone  
FidFile: PROTON

Pulse Sequence: PROTON (a2pul)  
Solvent: dmsc  
Data collected on: Feb 1 2014

Temp. 21.0 C / 294.1 K  
Operator: laputa20

Relax. delay 1.000 sec  
Pulse 45.0 degrees  
Acq. time 1.704 sec  
Width 4807.7 Hz  
Single scan  
OBSERVE H1, 300.1143878 MHz  
DATA PROCESSING  
Ft size 16384  
Total time 0 min 3 sec

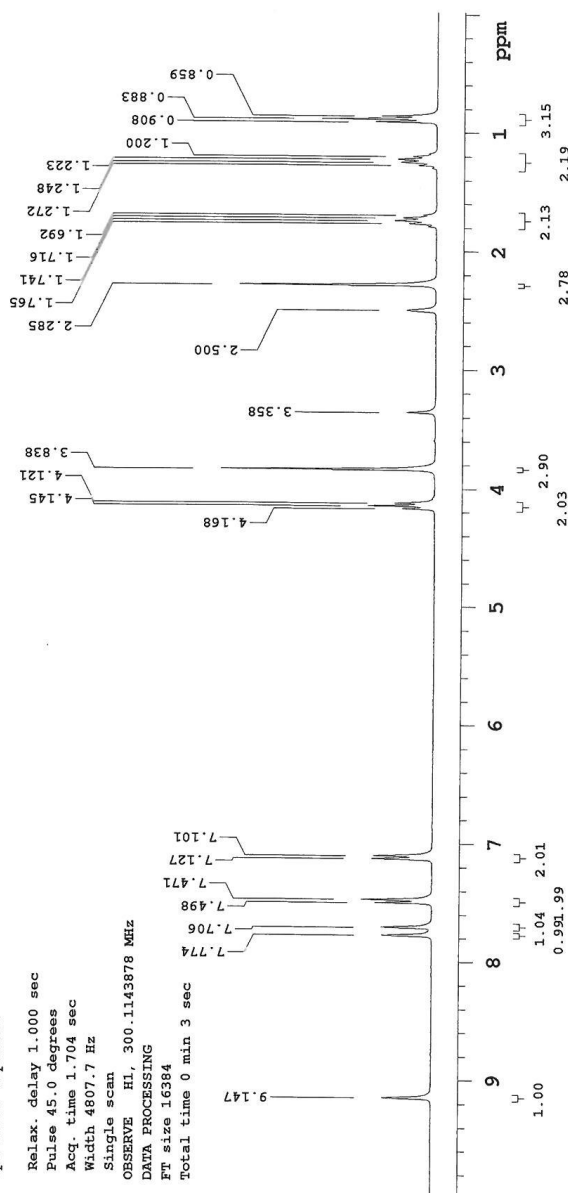

butyl\_methyl\_PTSA

Sample Name:  
Ethylindanone  
Data Collected on:  
Agilent-NMR-vnmrs300  
Archive directory:  
/home/vnmr1/vnmrsys/data/fidlib  
Sample directory:  
Ethylindanone  
FidFile: butyl\_methyl\_PTSA\_C  
Pulse Sequence: CARBON (s2pul)  
Solvent: dmsc  
Data collected on: Feb 1 2014

Temp. 21.0 C / 294.1 K  
Operator: laputa20  
Relax. delay 1.000 sec  
Pulse 45.0 degrees  
Acq. time 0.865 sec  
Width 18939.4 Hz  
1024 repetitions  
OBSERVE C13, 75.4638242 MHz  
DECOUPLE H1, 300.1158938 MHz  
Power 39 dB  
continuously on  
WALTZ-16 modulated  
DATA PROCESSING  
Line broadening 0.5 Hz  
FT size 32768  
Total time 31 min

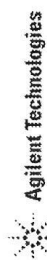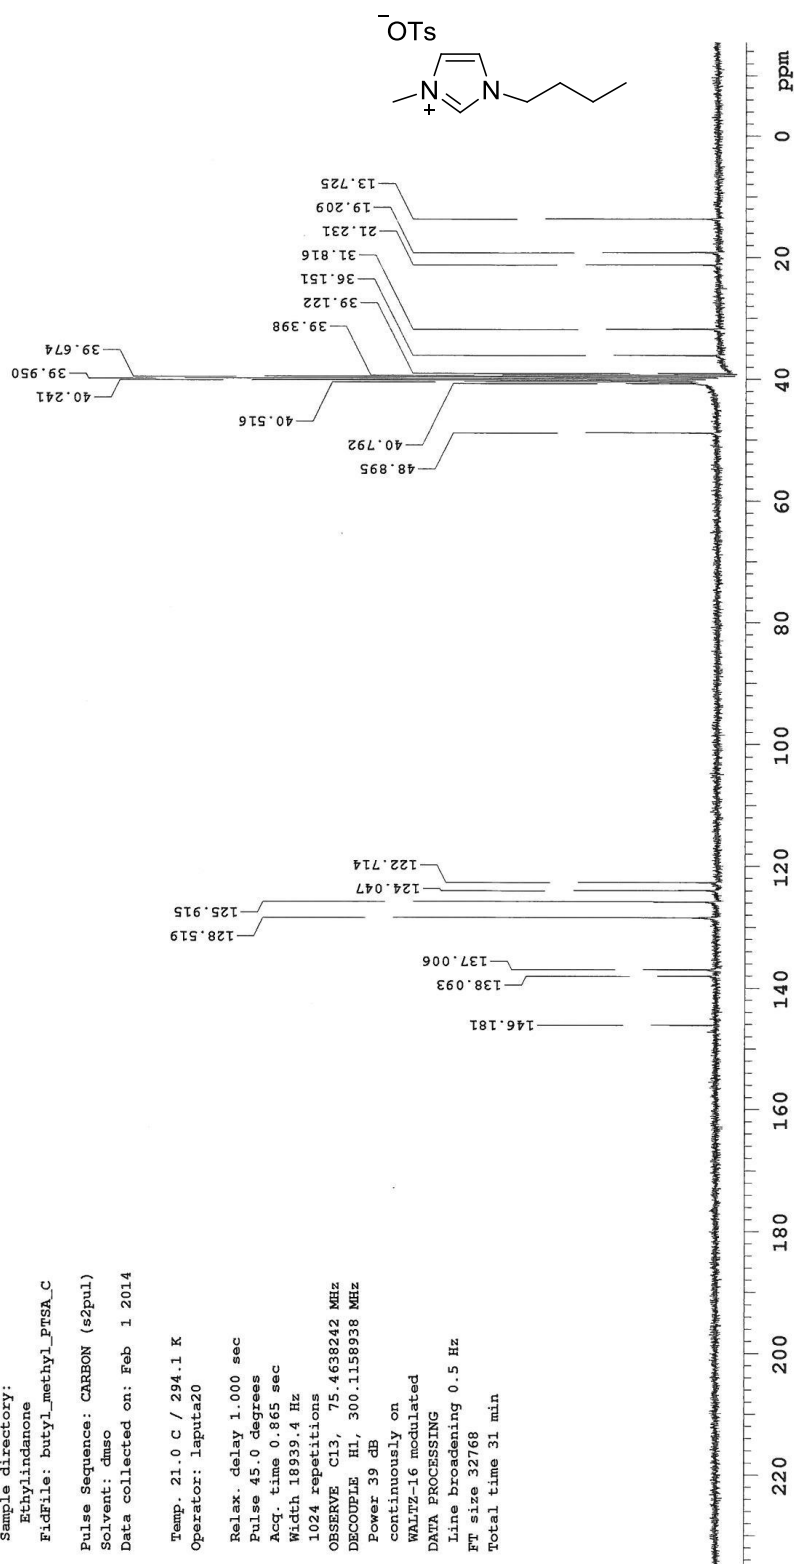

# 1,3-dimethylimidazolium hexafluorophosphate

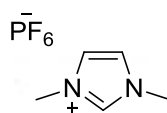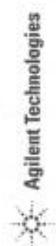

STANDARD 1H OBSERVE

Sample Name:

Archive directory:

Sample directory:

File: 13-dimethylimidazoliumpf6\_1H

Pulse Sequence: std1h (s2pul)

Solvent: DMSO

Data collected on: Oct 24 2013

Operator: laputa20

VNMR3-300 "Agilent-HMG"

Relax. delay 1.000 sec

Pulse 45.0 degrees

Acq. time 1.938 sec

Width 4520.5 Hz

23 repetitions

OBSERVE H1, 300.114366 MHz

DATA PROCESSING

FT size 32768

Total time 6 min 24 sec

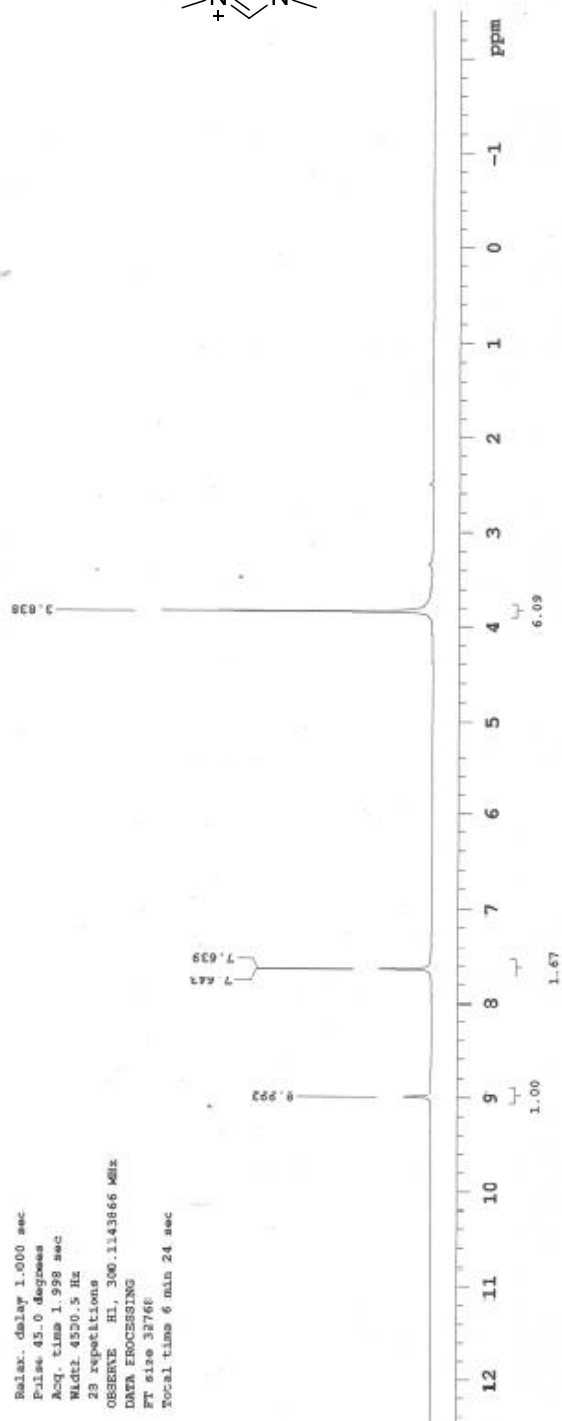

methyl\_methyl\_PF6

Sample Name:

Archive directory:

Sample directory:

FidFile: 13-dimethylimidazoliumpf6

Pulse Sequence: std13c (s2pul)

Solvent: DMSO

Data collected on: Oct 24 2013

Operator: laputa20

VNMR5-300 "Agilent-NMR"

Relax. delay 1.000 sec

Pulse 103.8 degrees

Acq. time 1.815 sec

Width 18761.7 Hz

2776 repetitions

OBSERVE C13, 75.4638242 MHz

DECODE H1, 300.1153538 MHz

Power 44 dB

on during acquisition

off during delay

WALTZ-16 modulated

DATA PROCESSING

Line broadening 1.0 Hz

FT size 131072

Total time 7 hr, 49 min

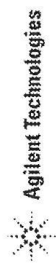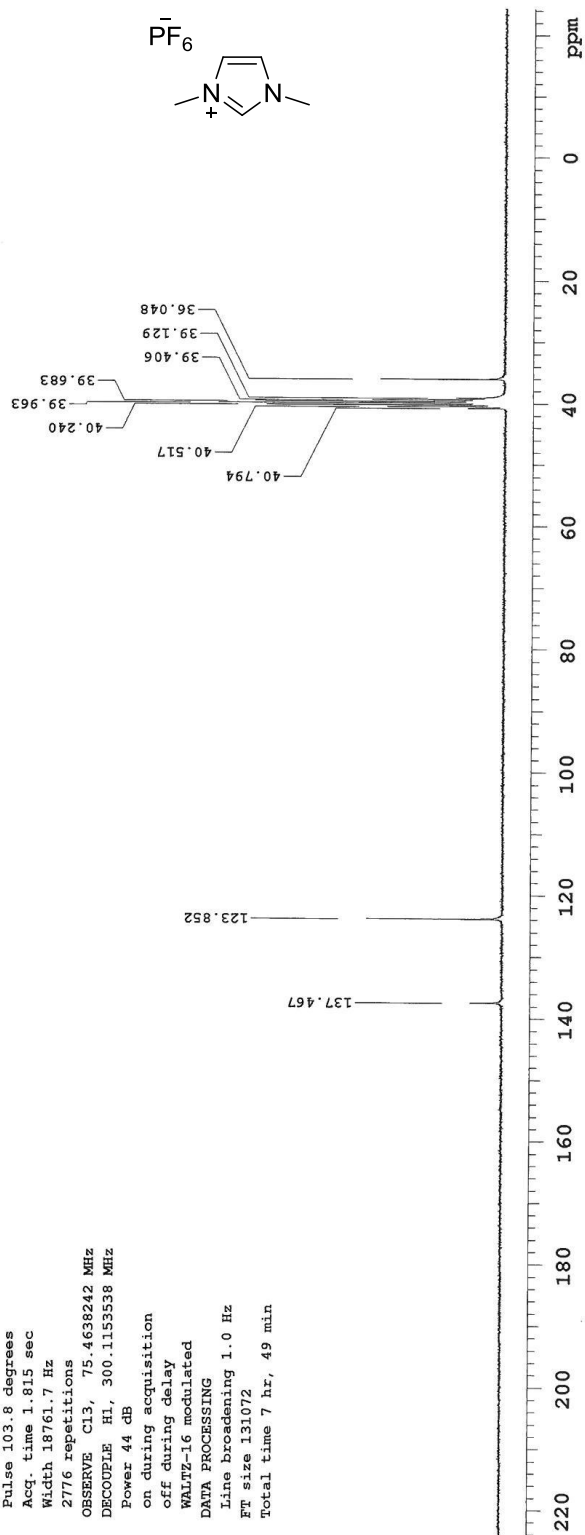

# 1,3-dimethylimidazolium tetrafluoroborate

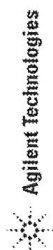

methyl\_methyl\_BF4

Sample Name:

Data Collected on:  
Agilent-NMR-vnmrs300  
Archive directory:

Sample directory:

FidFile: methyl\_methyl\_BF4\_H

Pulse Sequence: PROTON (s2pul)  
Solvent: dmsc  
Data collected on: Jan 29 2014

Temp. 22.0 C / 295.1 K  
Operator: laputa20

Relax. delay 1.000 sec  
Pulse 45.0 degrees  
Acq. time 1.704 sec  
Width 4807.7 Hz  
32 repetitions  
OBSERVE H1, 300.1143866 MHz  
DATA PROCESSING  
Ft size 16384  
Total time 1 min 27 sec

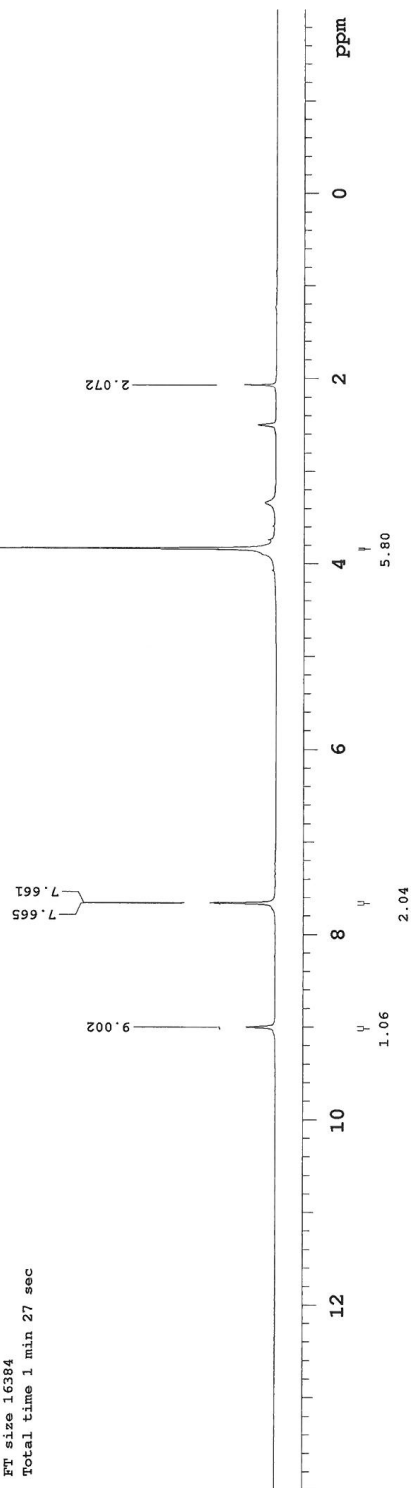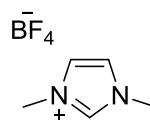



FP\_methyl\_methyl\_bf4\_C

Sample Name:

Archive directory:

Sample directory:

FidFile: FP\_methyl\_methyl\_bf4\_C

Pulse Sequence: std13c (s2pul)

Solvent: DMSO

Data collected on: Jan 6 2014

Operator: laputa20

VNMR3-300 "Agilent-NMR"

Relax. delay 1.000 sec

Pulse 103.8 degrees

Acq. time 1.815 sec

Width 18761.7 Hz

1024 repetitions

OBSERVE C13, 75.4638242 MHz

DECOUPLE H1, 300.1153538 MHz

Power 44 dB

on during acquisition

off during delay

WALTZ-16 modulated

DATA PROCESSING

Line broadening 1.0 Hz

Ft size 131072

Total time 48 min

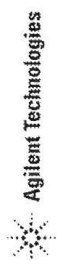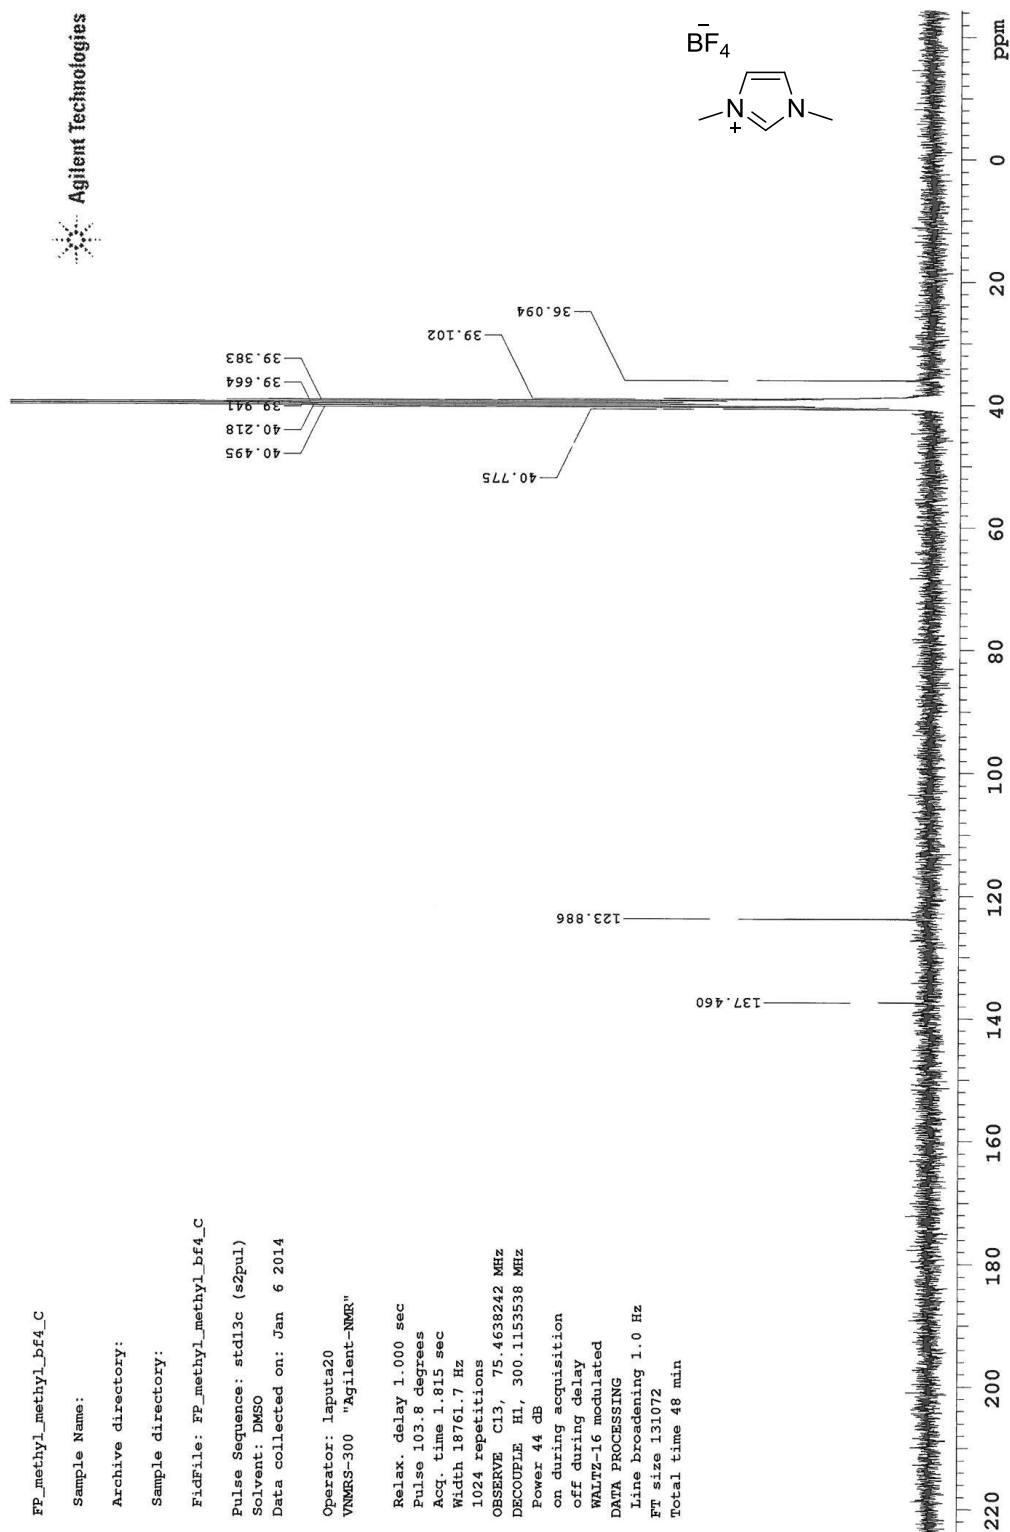

# 1-allyl-3-methylimidazolium hexafluorophosphate

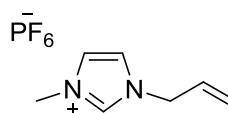

allyl\_methyl\_PF6

Sample Name:

Archive directory:

Sample directory:

FidFile: 1-allyl-3-methylimidazoliumpf6\_1H

Pulse Sequence: stdlh (s2pul)

Solvent: DMSO

Data collected on: Oct 24 2013

Operator: lputa20

VNMRS-300 "Agilent-NMR"

Relax. delay 1.000 sec

Pulse 45.0 degrees

Acq. time 1.998 sec

Width 4500.5 Hz

24 repetitions

OBSERVE H1, 300.1143869 MHz

DATA PROCESSING

FT size 32768

Total time 6 min 24 sec

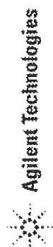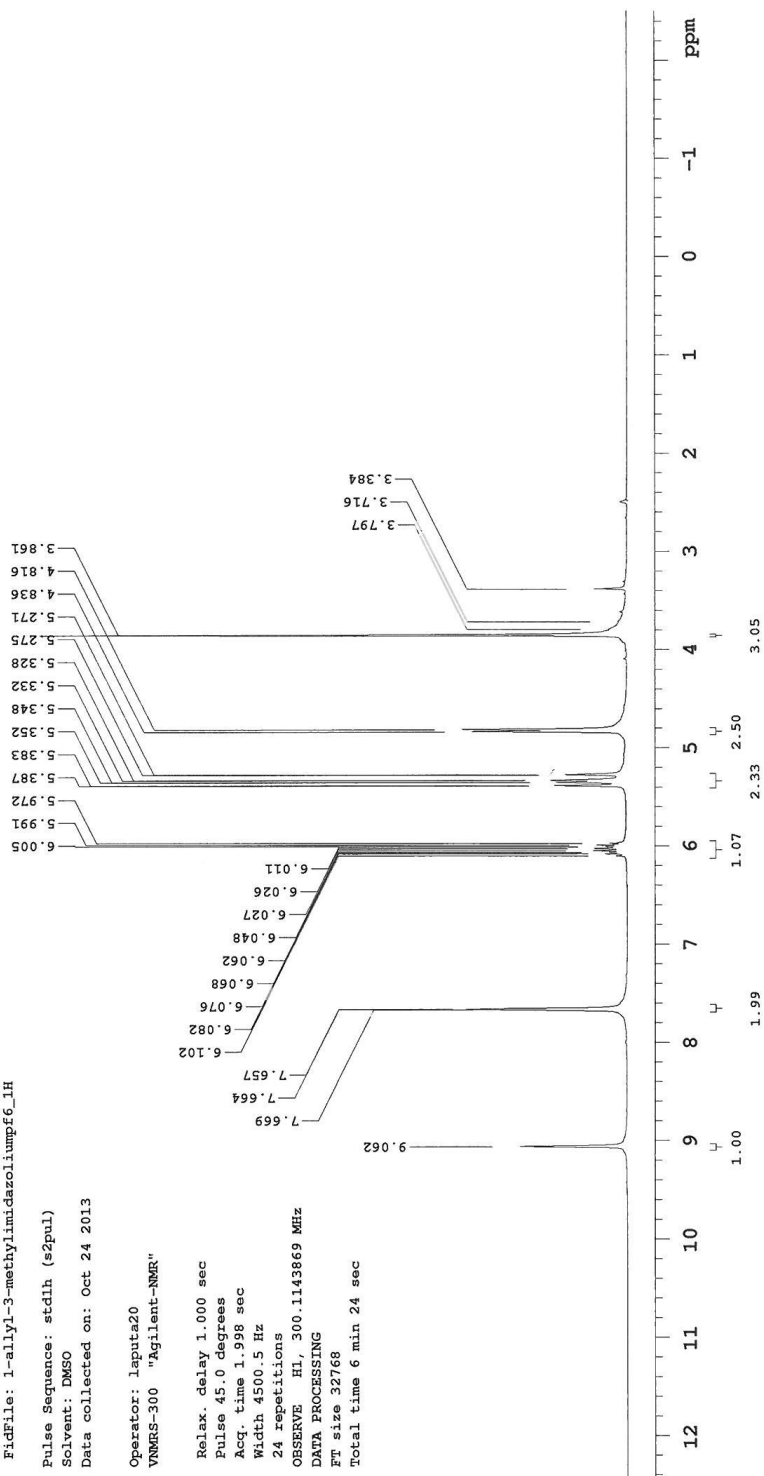

<sup>13</sup>C OBSERVE

Sample Name:

Archive directory:

Sample directory:

FidFile: 1-allyl-3-methylimidazolium<sup>+</sup>PF<sub>6</sub><sup>-</sup>.13C

Pulse Sequence: std13c (s2pul)

Solvent: DMSO

Data collected on: Oct 24 2013

Operator: laputa20

VNMRS-300 "Agilent-NMR"

Relax. delay 1.000 sec

Pulse 103.8 degrees

Acq. time 1.815 sec

Width 18761.7 Hz

1024 repetitions

OBSERVE C13, 75.4638242 MHz

DECOUPLE H1, 300.1153538 MHz

Power 44 dB

on during acquisition

off during delay

WALTZ-16 modulated

DATA PROCESSING

Line broadening 1.0 Hz

FT size 131072

Total time 48 min

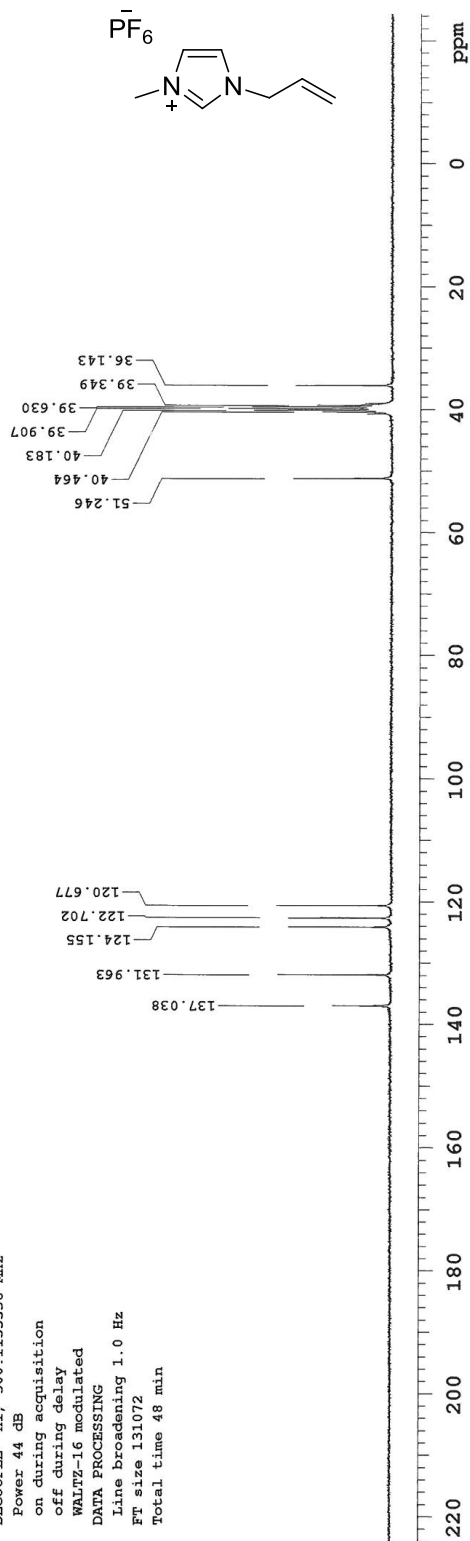

# 1-allyl-3-methylimidazolium tetrafluoroborate

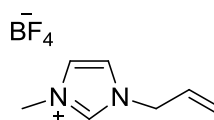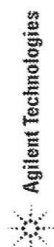

allyl\_methyl\_BF4

Sample Name:

Data Collected on:  
Agilent-NMR-vnmrs300

Archive directory:

Sample directory:

FidFile: PROTON

Pulse Sequence: PROTON (s2pul)

Solvent: dmsc

Data collected on: Feb 3 2014

Operator: laputaz0

Relax. delay 1.000 sec

Pulse 45.0 degrees

Acq. time 1.704 sec

Width 4807.7 Hz

32 repetitions

OBSERVE H1, 300.1143866 MHz

DATA PROCESSING

FT size 16384

Total time 1 min 27 sec

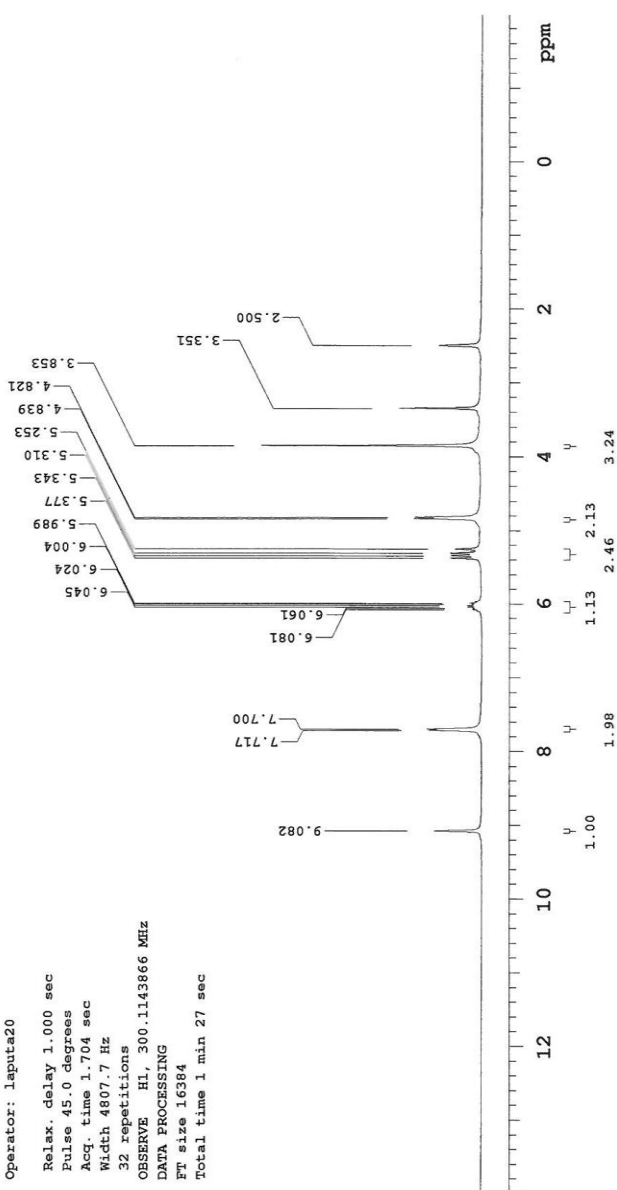

FP\_allyl\_methyl\_BF4\_C

Sample Name:

Archive directory:

Sample directory:

FidFile: FP\_allyl\_methyl\_BF4\_C

Pulse Sequence: std13c (s2pul)

Solvent: DMSO

Data collected on: Jan 9 2014

Operator: laputa20

VNMRS-300 "Agilent-NMR"

Relax. delay 1.000 sec

Pulse 103.8 degrees

Acq. time 1.815 sec

Width 18761.7 Hz

44 repetitions

OBSERVE C13, 75.4638242 MHz

DECOUPLE H1, 300.1153538 MHz

Power 44 dB

on during acquisition

off during delay

WALTZ-16 modulated

DATA PROCESSING

Line broadening 1.0 Hz

FT size 131072

Total time 48 min

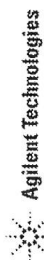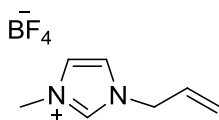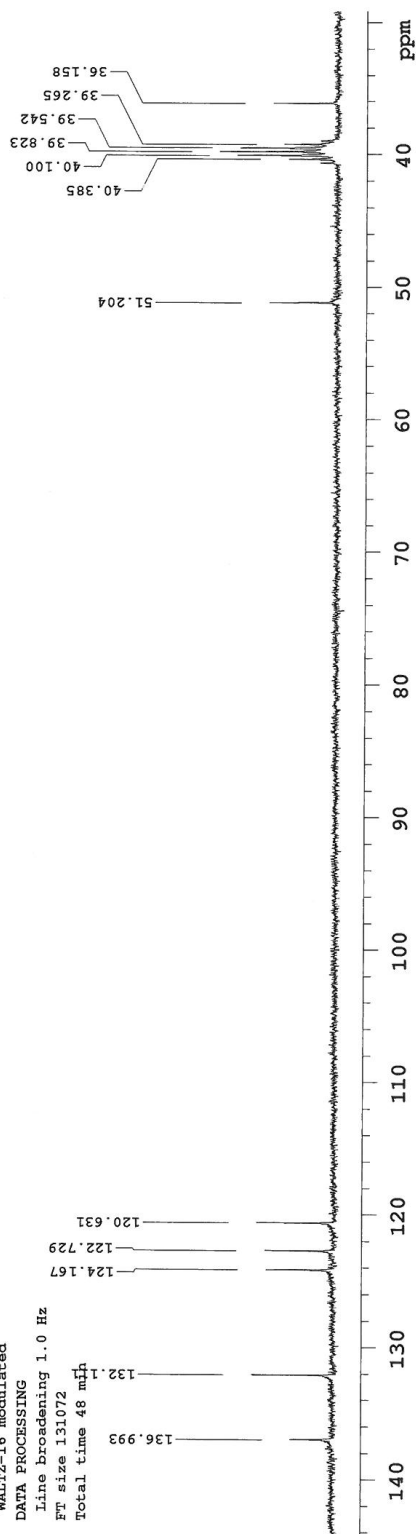

# 1-benzyl-3-methylimidazolium hexafluorophosphate

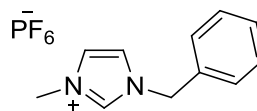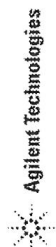

benzyl\_methyl\_pf6

Sample Name:

Archive directory:

Sample directory:

FidFile: FP\_benzyl\_methyl\_pf6

Pulse Sequence: stdlh (s2pul)

Solvent: DMSO

Data collected on: Oct 23 2013

Operator: laputa20

VNMR-300 "Agilent-NMR"

Relax. delay 1.000 sec

Pulse 45.0 degrees

Acq. time 1.998 sec

Width 4500.5 Hz

128 repetitions

OBSERVE H1, 300.1143855 MHz

DATA PROCESSING

Ft size 32768

Total time 6 min 24 sec

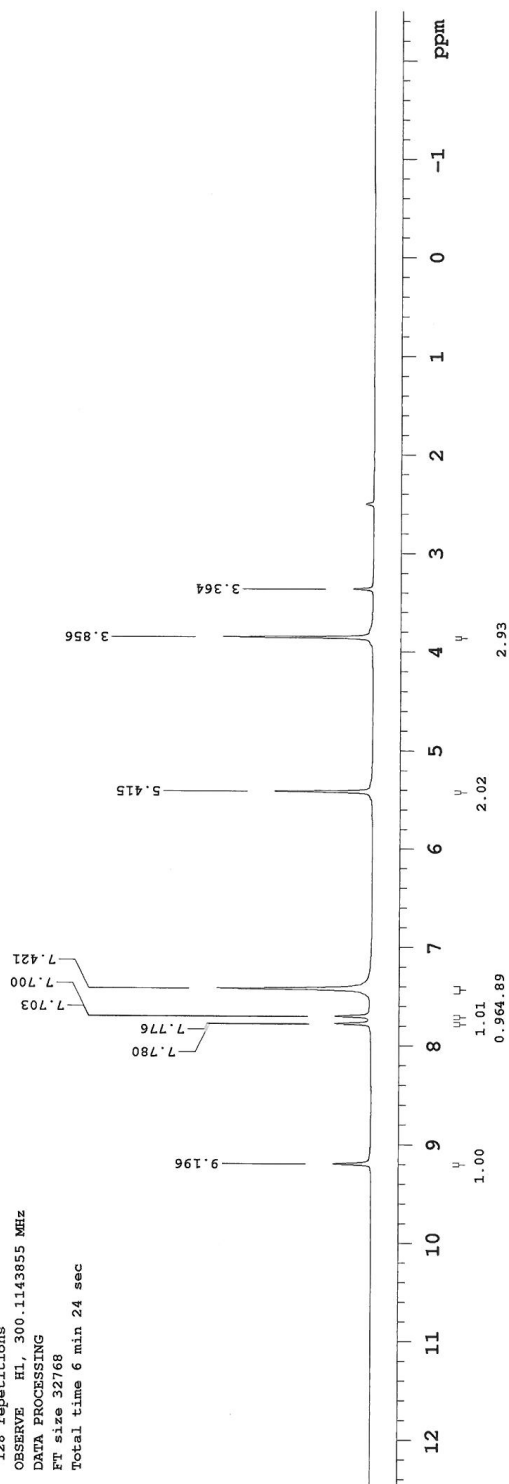

benzyl\_methyl\_pf6

Sample Name:

Archive directory:

Sample directory:

FidFile: FP\_benzyl\_methyl\_pf6\_c

Pulse Sequence: std13c (s2pul)

Solvent: DMSO

Data collected on: Oct 23 2013

Operator: laputa20

VNMRS-300 "Agilent-NMR"

Relax. delay 1.000 sec

Pulse 103.8 degrees

Acq. time 1.815 sec

Width 18761.7 Hz

3120 repetitions

OBSERVE C13, 75.4638242 MHz

DECOUPLE H1, 300.1153538 MHz

Power 44 dB

on during acquisition

off during delay

WALTZ-16 modulated

DATA PROCESSING

Line broadening 1.0 Hz

FT size 131072

Total time 7 hr, 49 min

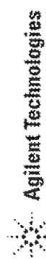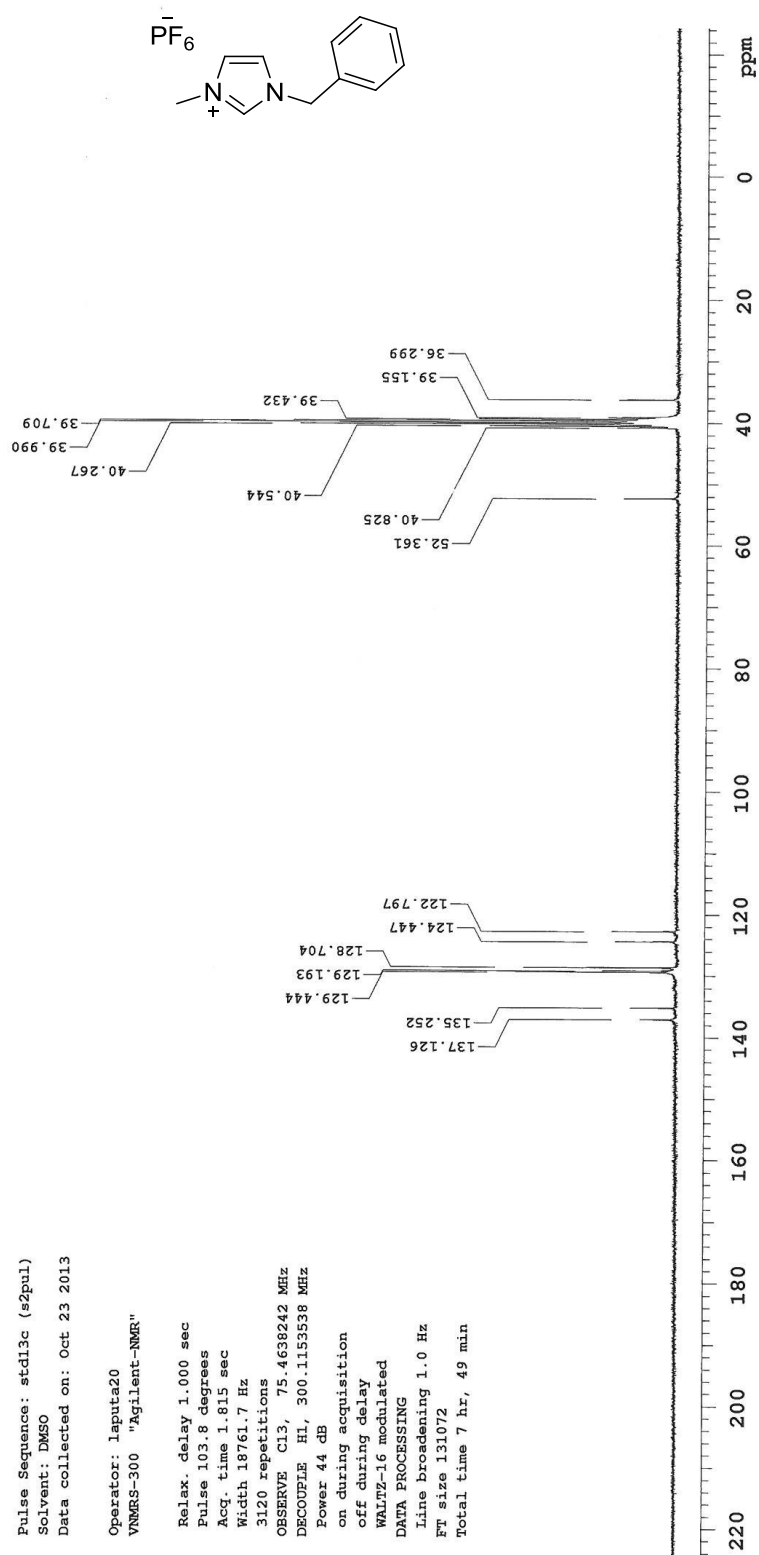

# 1-benzyl-3-methylimidazolium tetrafluoroborate

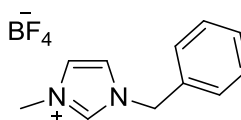

Ethylindanone standard test sample  
Recorded on 400-MR with OneNMR probe and PZT tuning

Sample Name:  
Ethylindanone  
Data Collected on:  
Agilent-NMR-vnmrs300  
Archive directory:  
/home/vnmr1/vnmrsys/data/fidlib  
Sample directory:  
Ethylindanone  
FidFile: Benzyl\_methyl\_bf4\_H  
Pulse Sequence: PROTON (s2pul)  
Solvent: dmsc  
Data collected on: Jan 23 2014

Temp. 22.0 C / 295.1 K  
Operator: laputa20  
Relax. delay 1.000 sec  
Pulse 45.0 degrees  
Acq. time 1.704 sec  
Width 4807.7 Hz  
128 repetitions  
OBSERVE HL 300.1143878 MHz  
DATA PROCESSING  
FT size 16384  
Total time 5 min 46 sec

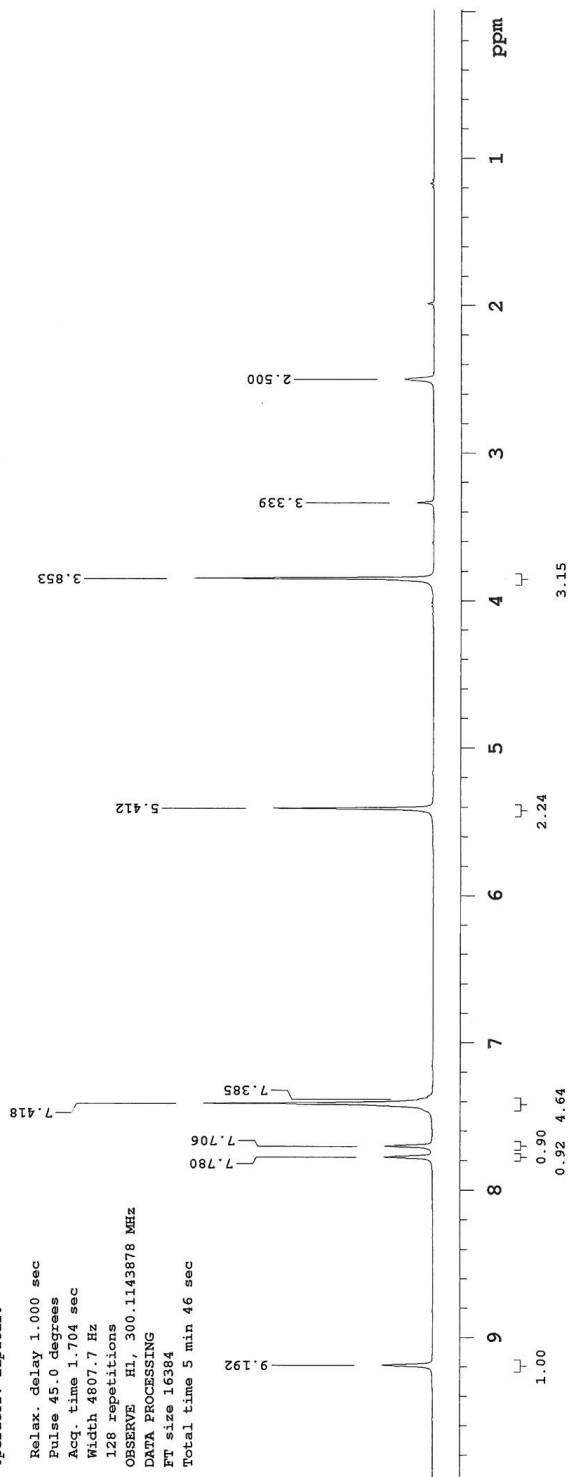

Agilent Technologies



benzyl\_methyl\_BF4

Sample Name:

Ethylindanone

Data Collected on:

Agilent-NMR-vnmrs300

Archive directory:

/home/vnmr1/vnmrsys/data/ftlib

Sample directory:

Ethylindanone

FidFile: CARBON

Pulse Sequence: CARBON (s2pul)

Solvent: dmsd

Data collected on: Feb 2 2014

Temp. 17.1 C / 280.2 K

Operator: laputa20

Relax. delay 1.000 sec

Pulse 45.0 degrees

Acq. time 0.865 sec

Width 18939.4 Hz

832 repetitions

OBSERVE C13, 75.4638242 MHz

DECOUPLE H1, 300.1158938 MHz

Power 39 dB

continuously on

WALTZ-16 modulated

DATA PROCESSING

Line broadening 0.5 Hz

FT size 32768

Total time 31 min

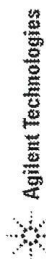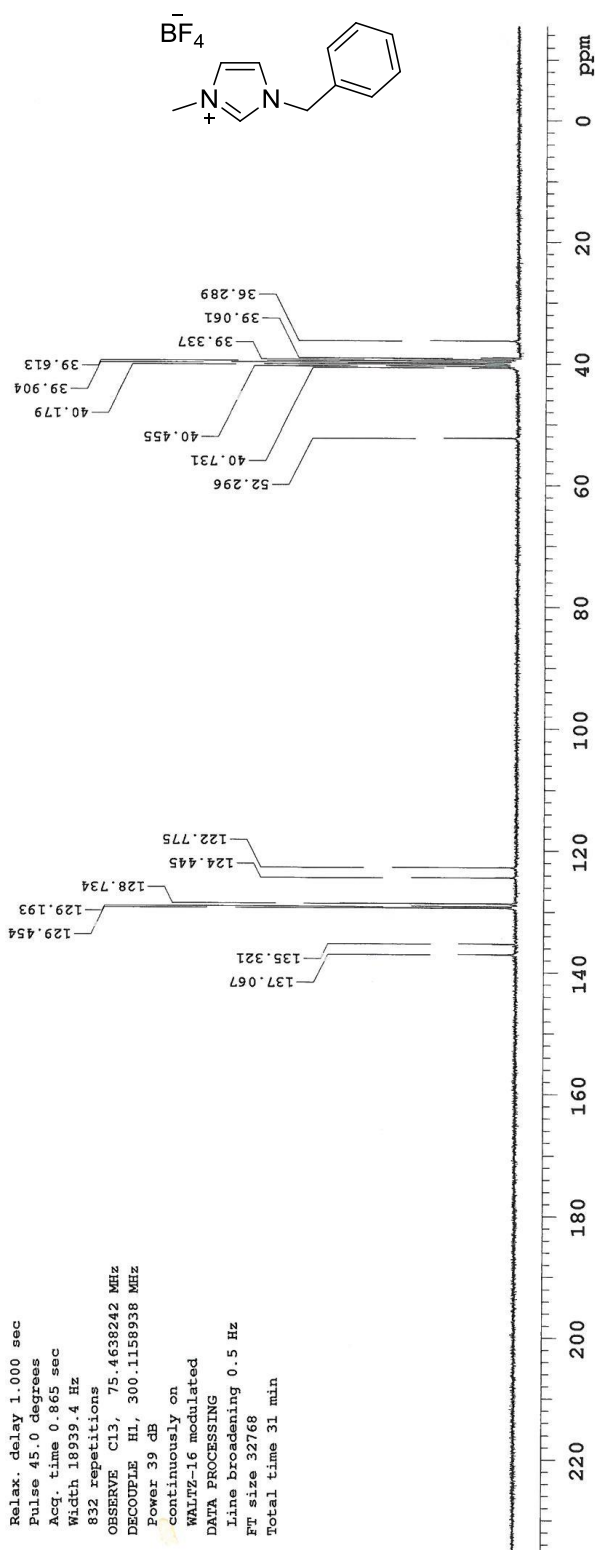

# 3-methyl-1-phenylimidazolium hexafluorophosphate

PF<sub>6</sub><sup>-</sup>

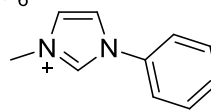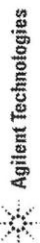

phenyl\_methyl\_PF6

Sample Name:

Archive directory:

Sample directory:

FidFile: FP\_phenyl\_methyl\_PF6\_H

Pulse Sequence: stdlh (s2pul)

Solvent: DMSO

Data collected on: Jan 8 2014

Operator: laputaz0

VNMR-300 "Agilent-NMR"

Relax. delay 1.000 sec

Pulse 45.0 degrees

Acq. time 1.998 sec

Width 4500.5 Hz

16 repetitions

OBSERVE H1, 300.1143880 MHz

DATA PROCESSING

FT size 32768

Total time 6 min 24 sec

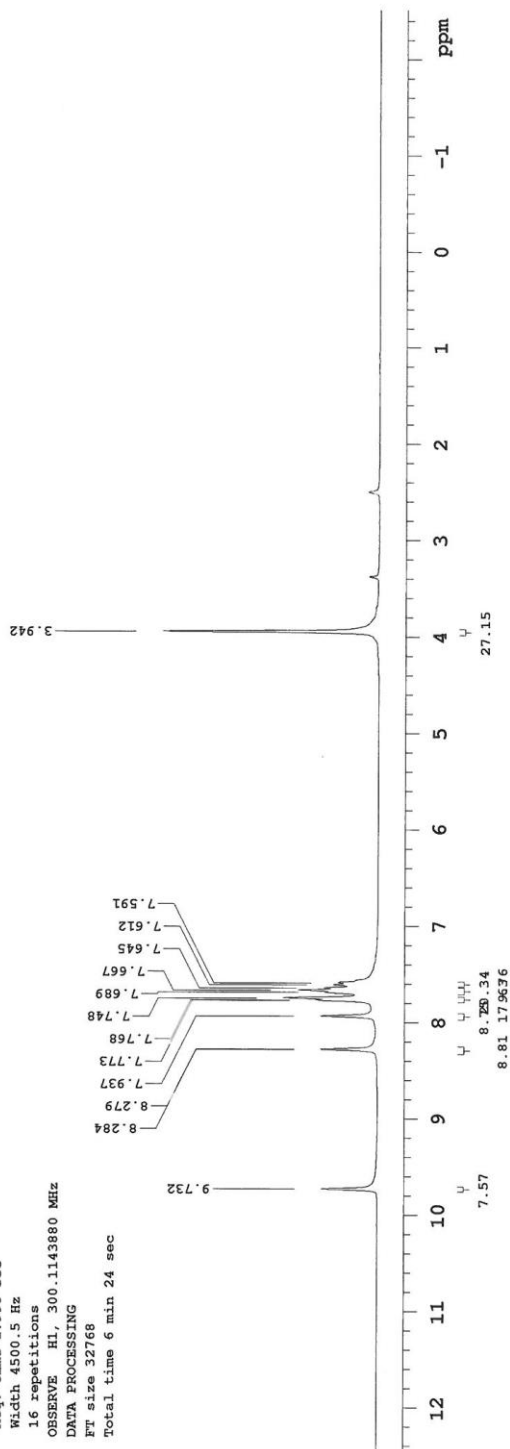

phenyl\_methyl\_PF6

Sample Name:

Archive directory:

Sample directory:

FidFile: PF\_phenyl\_methyl\_pf6

Pulse Sequence: std13c (s2pul)

Solvent: DMSO

Data collected on: Oct 16 2013

Operator: laputa20

VNMR-300 "Agilent-NMR"

Relax. delay 1.000 sec

Pulse 103.8 degrees

Acq. time 1.815 sec

Width 18761.7 Hz

4360 repetitions

OBSERVE C13, 75.4638242 MHz

DECOUPLE H1, 300.1153538 MHz

Power 44 dB

on during acquisition

off during delay

WALTZ-16 modulated

DATA PROCESSING

Line broadening 1.0 Hz

FT size 131072

Total time 7 hr, 49 min

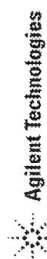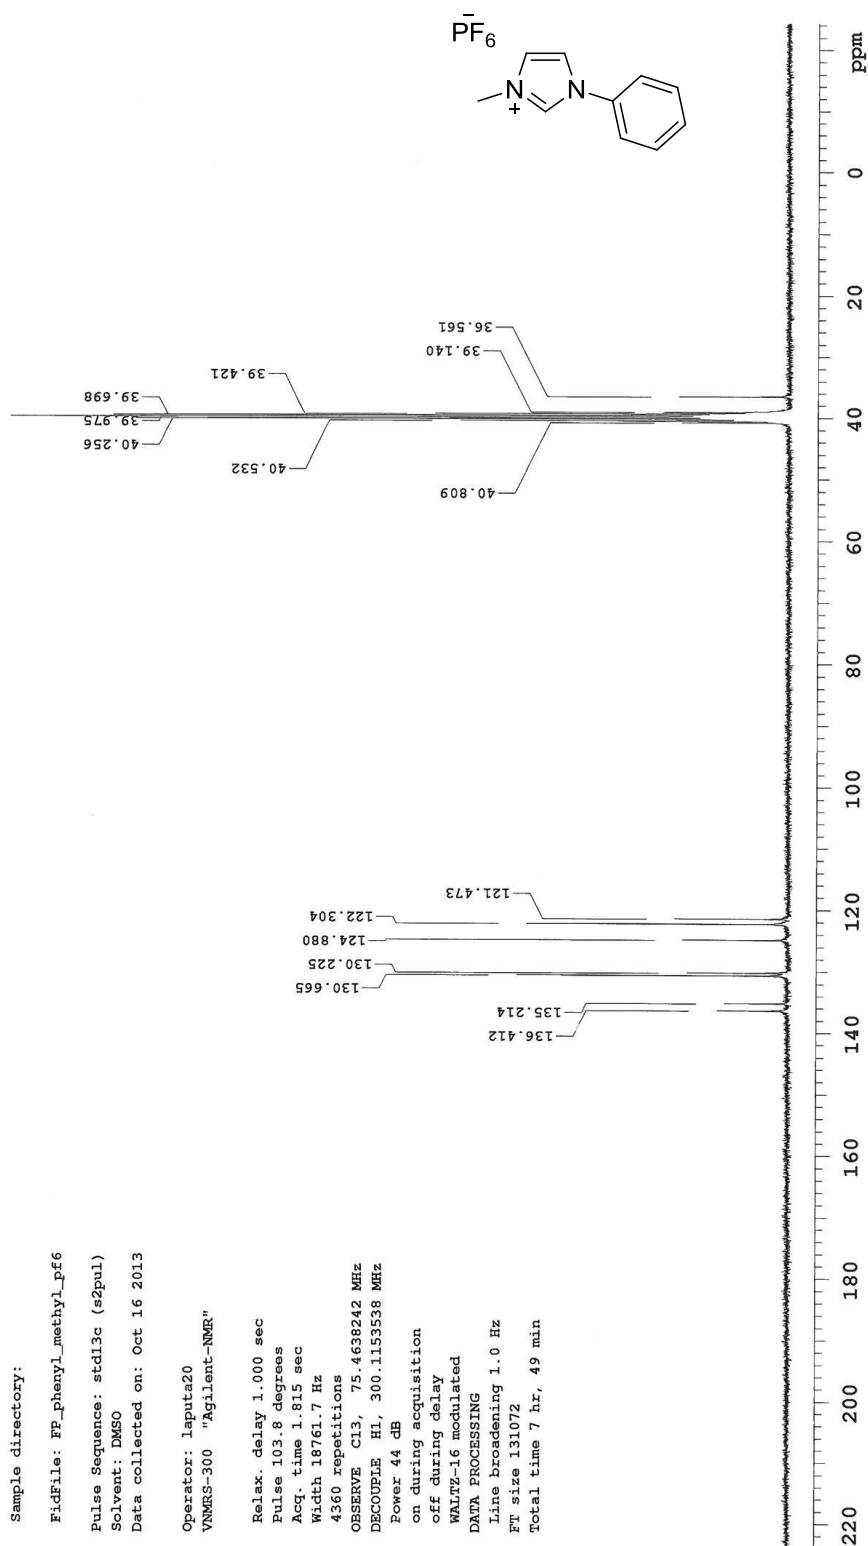

# 3-methyl-1-phenylimidazolium tetrafluoroborate

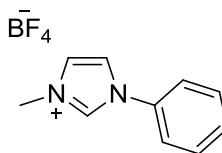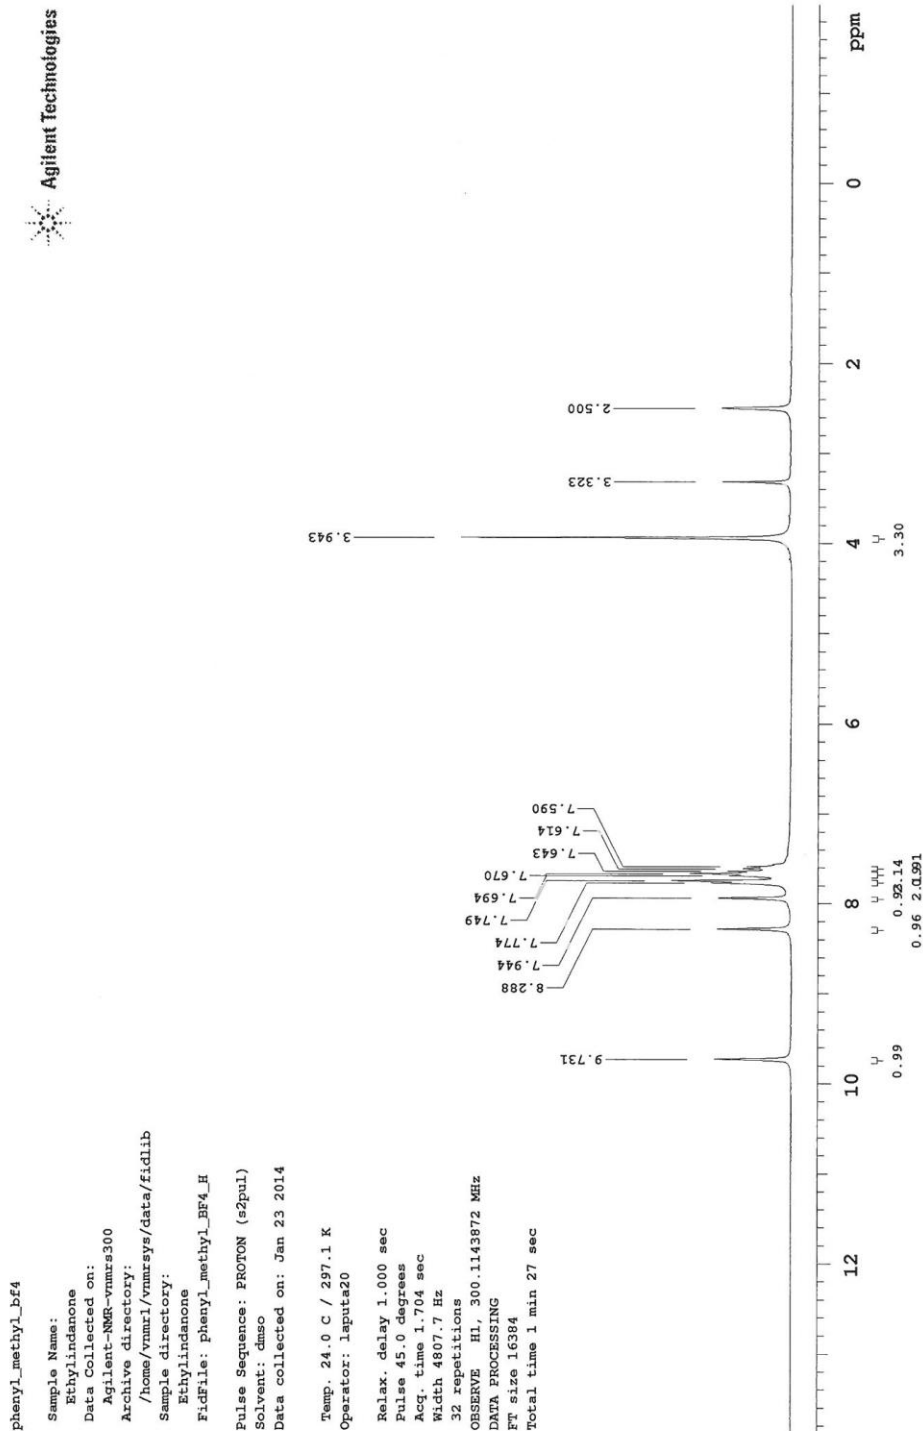

phenyl\_methyl\_BF4

Sample Name:  
Ethylindanone  
Data Collected on:  
Agilent-NMR-vnmrs300  
Archive directory:  
/home/vnmr1/vnmrsys/data/fidlib  
Sample directory:  
Ethylindanone  
FidFile: phenyl\_methyl\_BF4\_C

Pulse Sequence: CARBON (s2pul)  
Solvent: dms  
Data collected on: Feb 2 2014

Operator: laputa20

Relax. delay 1.000 sec  
Pulse 45.0 degrees  
Acq. time 0.865 sec  
Width 18939.4 Hz  
1024 repetitions  
OBSERVE C13, 75.4638242 MHz  
DECOUPLE H1, 300.1158938 MHz  
Power 39 dB  
continuously on  
WALTZ-16 modulated  
DATA PROCESSING  
Line broadening 0.5 Hz  
FT size 32768  
Total time 31 min

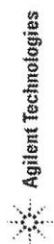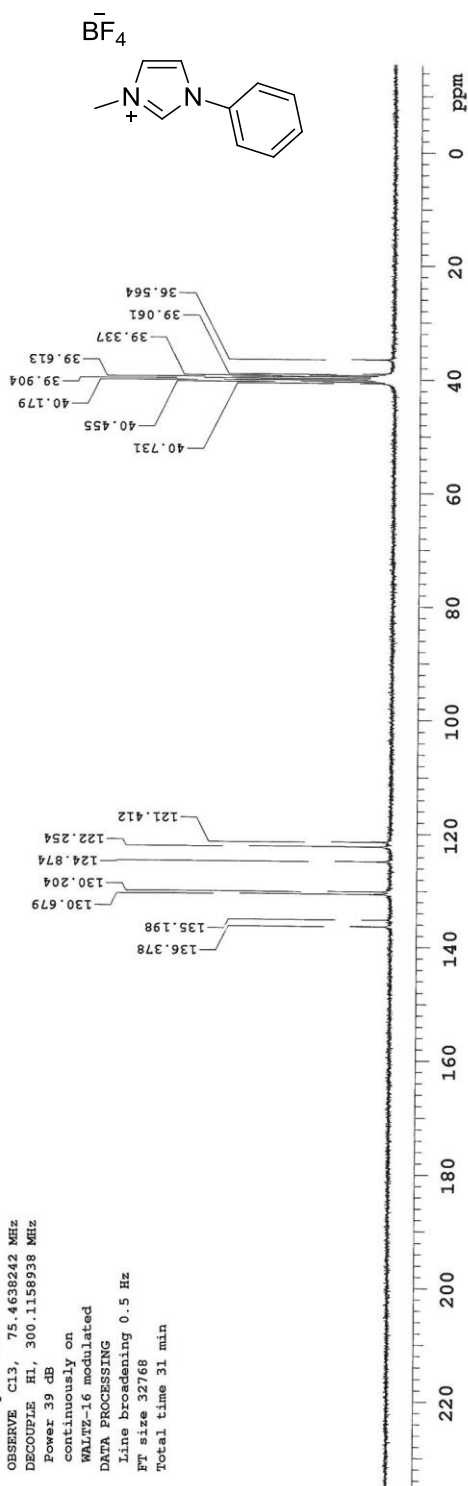

# 3-methyl-1-vinylimidazolium hexafluorophosphate

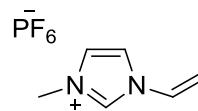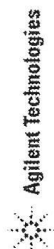

## Sample Name:

Data Collected on:  
Agilent-NMR-vnmrs300  
Archive directory:

## Sample directory:

FidFile: PROTON

Pulse Sequence: PROTON (s2pul)  
Solvent: dmsd  
Data collected on: Jan 28 2014

Temp. 22.0 C / 295.1 K  
Operator: laputa20

Relax. delay 1.000 sec  
Pulse 45.0 degrees  
Acq. time 1.704 sec  
Width 4807.7 Hz

32 repetitions  
OBSERVE H1, 300.1143861 MHz

DATA PROCESSING  
FT size 16384  
Total time 1 min 27 sec

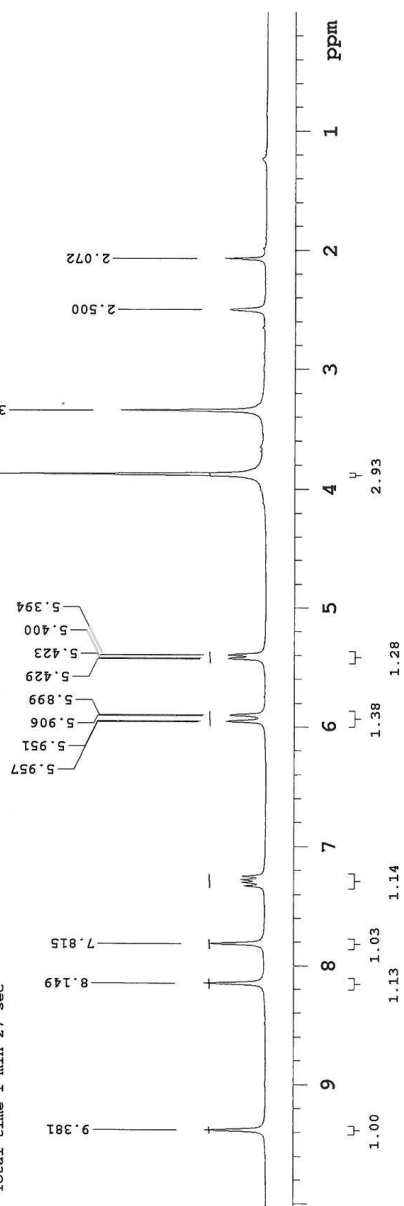

FP\_vinyl\_methyl\_pf6\_C

Sample Name:

Archive directory:

Sample directory:

FidFile: FP\_vinyl\_methyl\_pf6\_C

Pulse Sequence: std13c (s2pul)

Solvent: DMSO

Data collected on: Dec 25 2013

Operator: laputa20

VNMRS-300 "Agilent-NMR"

Relax. delay 1.000 sec

Pulse 103.8 degrees

Acq. time 1.815 sec

Width 18761.7 Hz

1024 repetitions

OBSERVE C13, 75.4638242 MHz

DECOUPLE H1, 300.1153538 MHz

Power 44 dB

on during acquisition

off during delay

WALTZ-16 modulated

DATA PROCESSING

Line broadening 1.0 Hz

FT size 131072

Total time 48 min

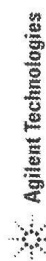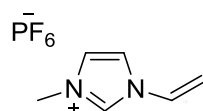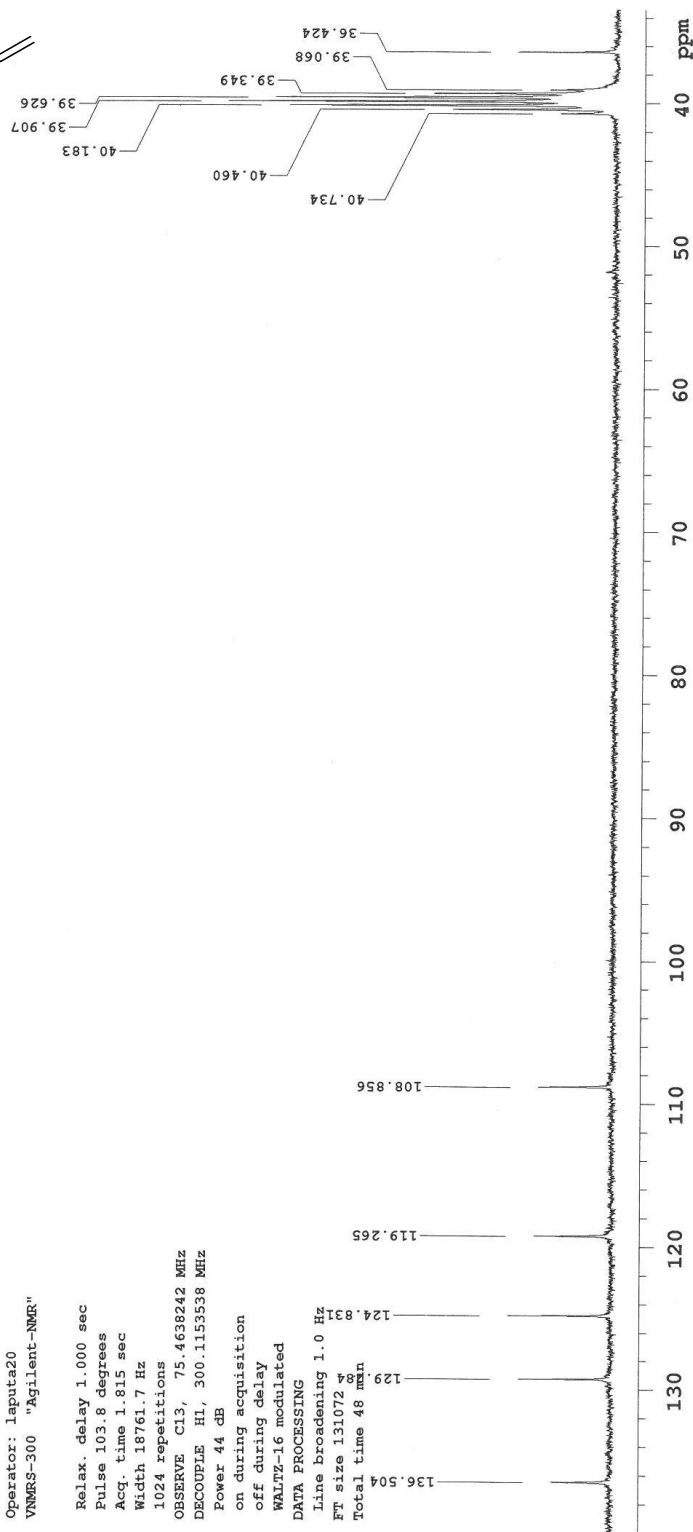

# 3-methyl-1-vinylimidazolium tetrafluoroborate

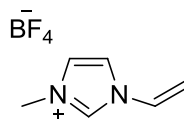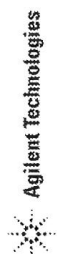

Sample Name:  
Ethylindanone  
Data Collected on:  
Agilent-NMR-vnmrs300  
Archive directory:  
/home/vmrl/vnmrsys/data/fidlib  
Sample directory:  
Ethylindanone  
FidFile: vinyl\_methyl\_BF4\_H  
Pulse Sequence: PROTON (s2pul)  
Solvent: dmsd  
Data collected on: Jan 26 2014

Temp. 20.0 C / 293.1 K  
Operator: laputa20  
Relax. delay 1.000 sec  
Pulse 45.0 degrees  
Acq. time 1.704 sec  
Width 4807.7 Hz  
16 repetitions  
OBSERVE H1, 300.1143932 MHz  
DATA PROCESSING  
FT size 16384  
Total time 0 min 43 sec

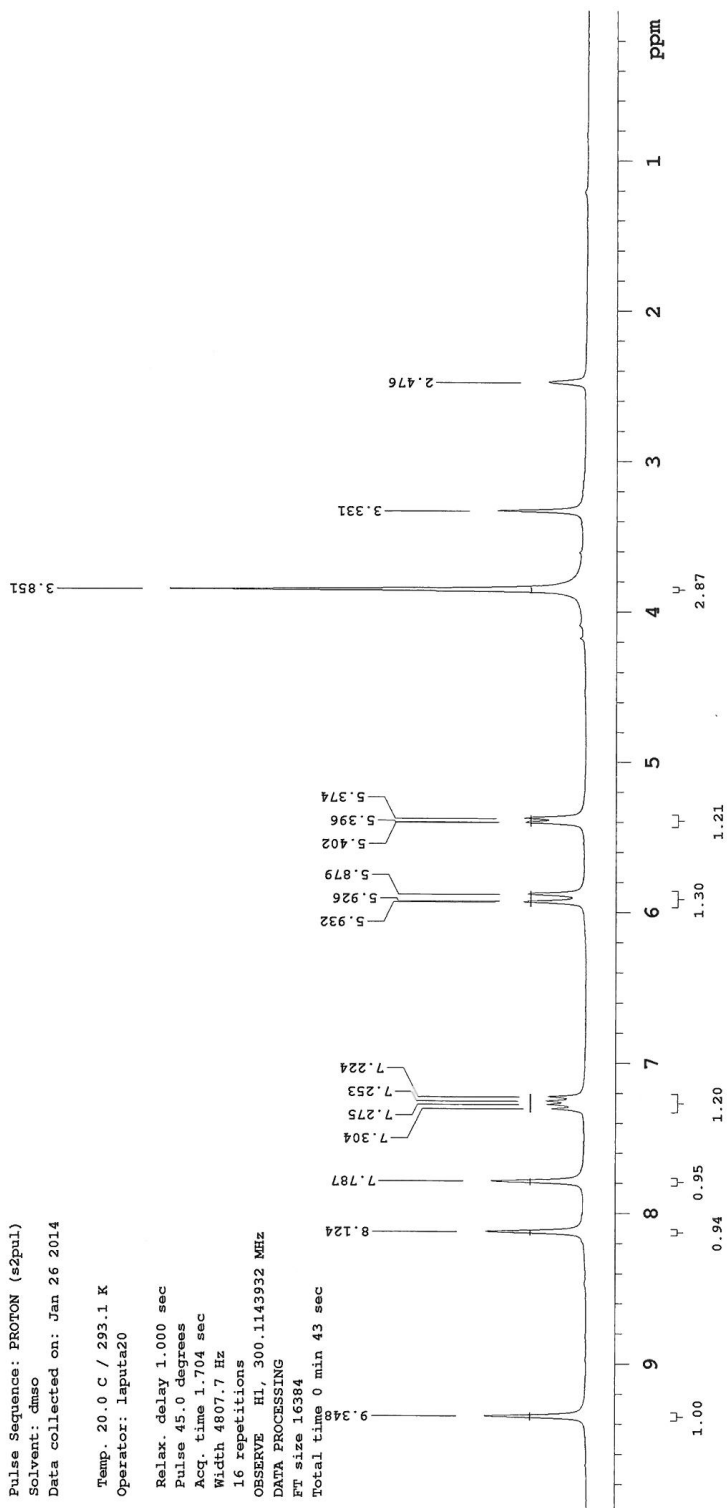



vinyl\_methyl\_BF4

Agilent Technologies

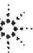

Sample Name:

Ethylindanone

Data Collected on:

Agilent-NMR-vnmrs300

Archive directory:

/home/vnmr1/vnmrsys/data/fidlib

Sample directory:

Ethylindanone

FidFile: CARBON

Pulse Sequence: CARBON (s2pul)

Solvent: dmsd

Data collected on: Feb 2 2014

Operator: laputa20

Relax. delay 1.000 sec

Pulse 45.0 degrees

Acq. time 0.865 sec

Width 18939.4 Hz

1024 repetitions

OBSERVE C13, 75.4638242 MHz

DECOUPLE H1, 300.1158938 MHz

Power 39 dB

continuously on

WALTZ-16 modulated

DATA PROCESSING

Line broadening 0.5 Hz

FT size 32768

Total time 31 min

BF<sub>4</sub><sup>-</sup>

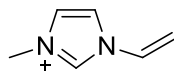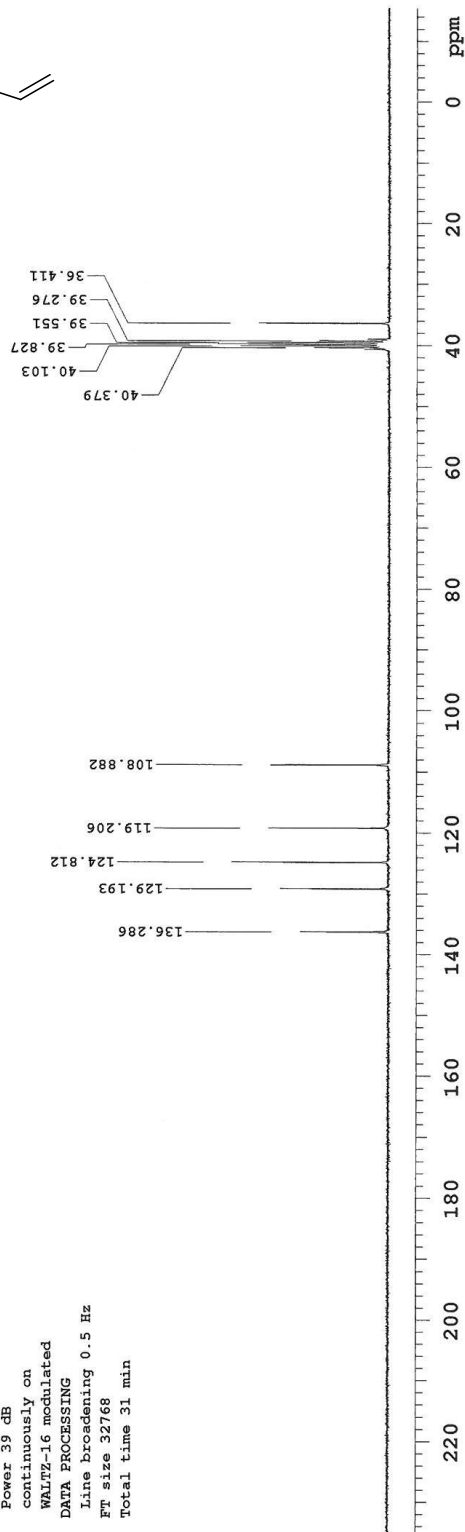

# 1-butyl-3-ethylimidazolium tetrafluoroborate

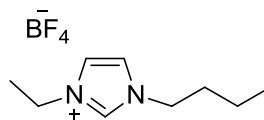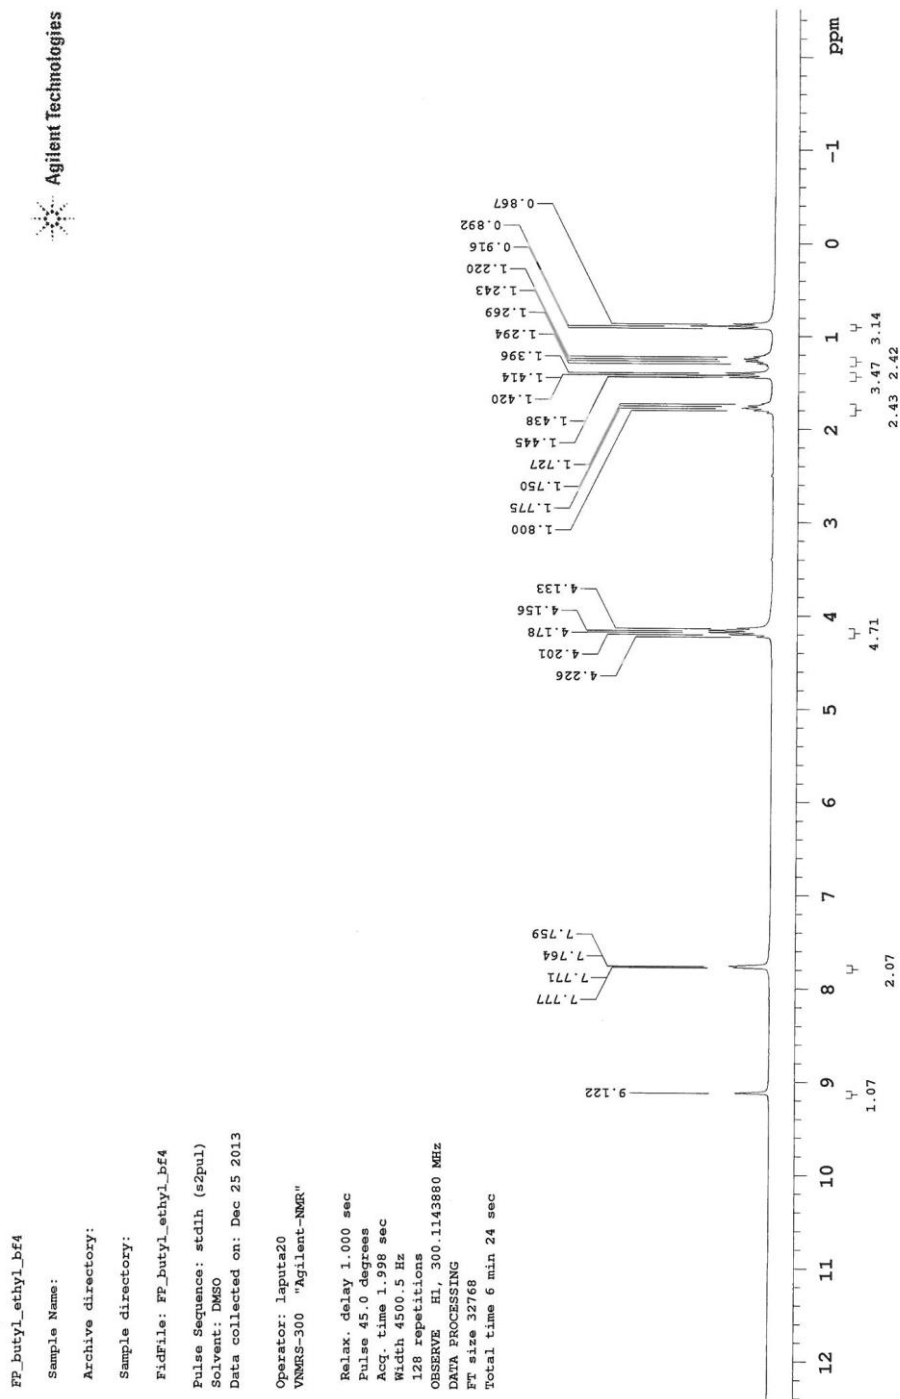

FP\_butyl\_ethyl\_bf4\_C

Sample Name:

Archive directory:

Sample directory:

FidFile: FP\_butyl\_ethyl\_bf4\_C

Pulse Sequence: std13c (s2pul)

Solvent: DMSO

Data collected on: Dec 25 2013

Operator: laputa20

VNMR-300 "Agilent-NMR"

Relax. delay 1.000 sec

Pulse 103.8 degrees

Acq. time 1.815 sec

Width 18761.7 Hz

1024 repetitions

OBSERVE C13, 75.4638242 MHz

DECOUPLE H1, 300.1153538 MHz

Power 44 dB

on during acquisition

off during delay

WALTZ-16 modulated

DATA PROCESSING

Line broadening 1.0 Hz

FT size 131072

Total time 48 min

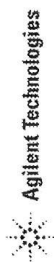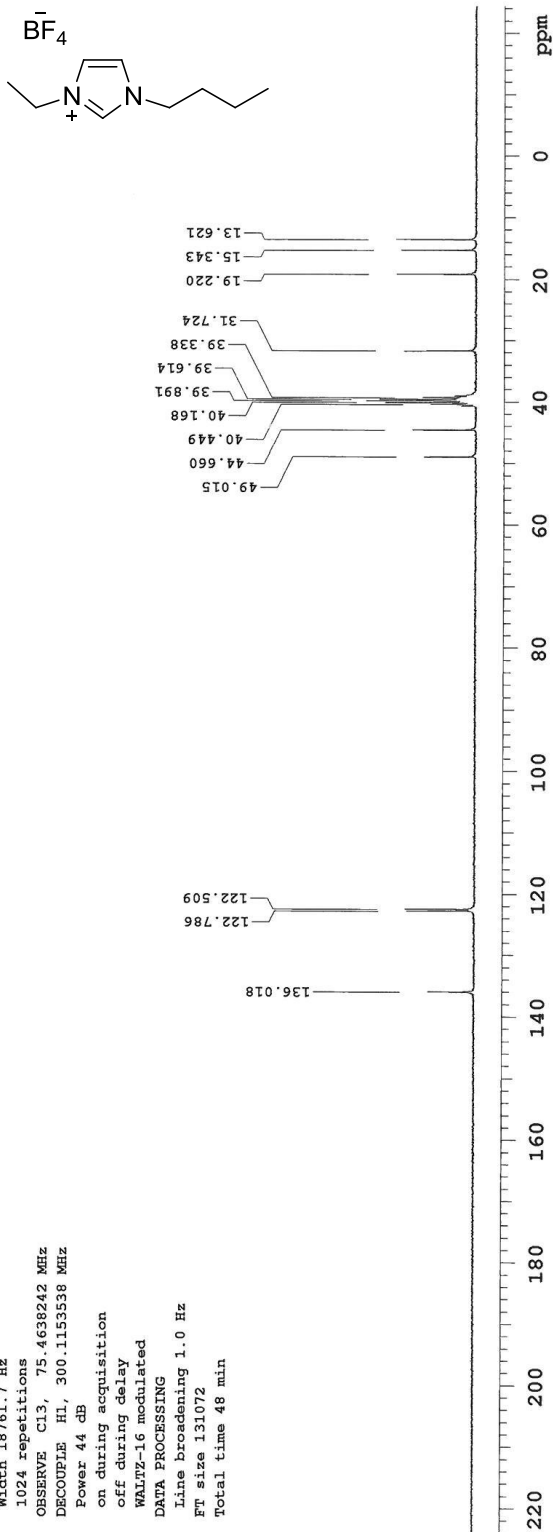

1-butyl-3-propylimidazolium tetrafluoroborate

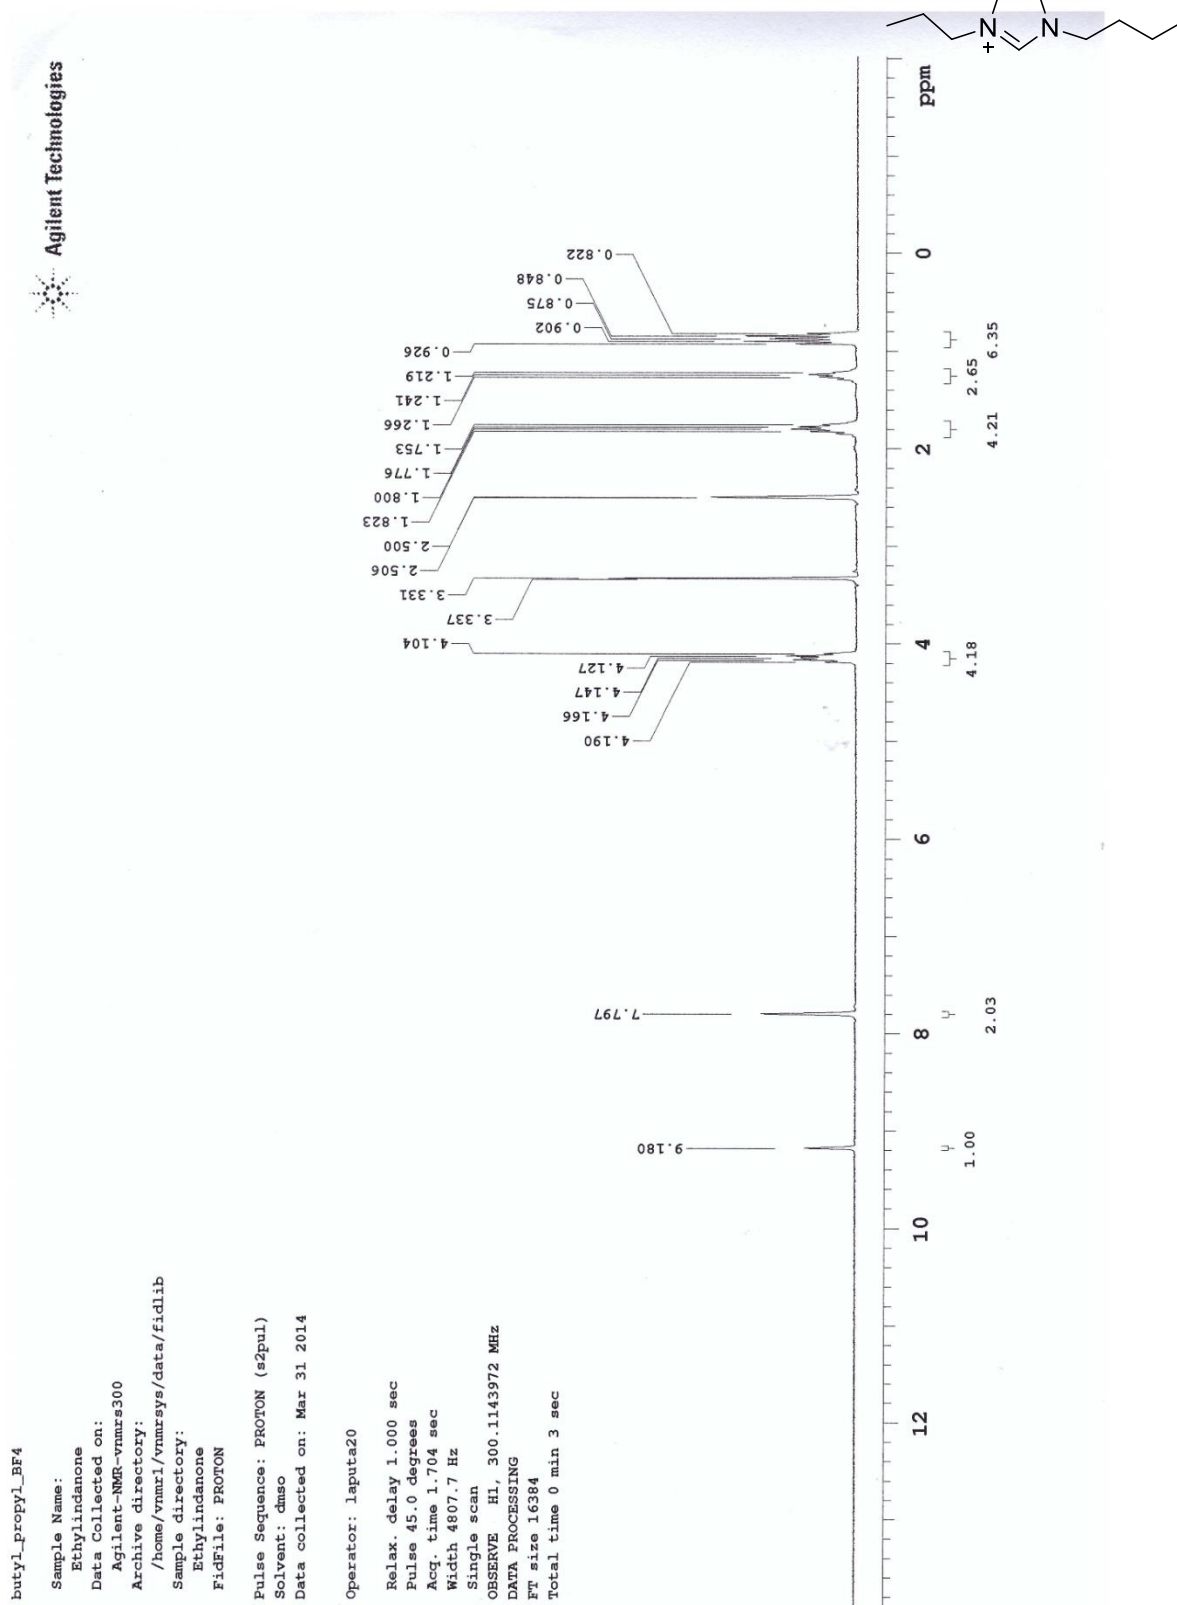

FP\_butyl\_propyl\_bf4\_C

Pulse Sequence: s2pul

Solvent: DMSO

Ambient temperature

Operator: laputa20

Mercury-300BB "PNUCHEM"

Relax. delay 1.000 sec

Pulse 103.6 degrees

Acc 1000.130 MHz

Width 18761.7 Hz

1024 repetitions

OBSERVE C13, 75.4638062 MHz

DECOUPLE H1, 300.1153538 MHz

Power 44 dB

on during acquisition

off during decoupling

WALTZ-16 modulated

DATA PROCESSING

Line broadening 1.0 Hz

FT size 131072

Total time 1 hr, 6 min, 44 sec

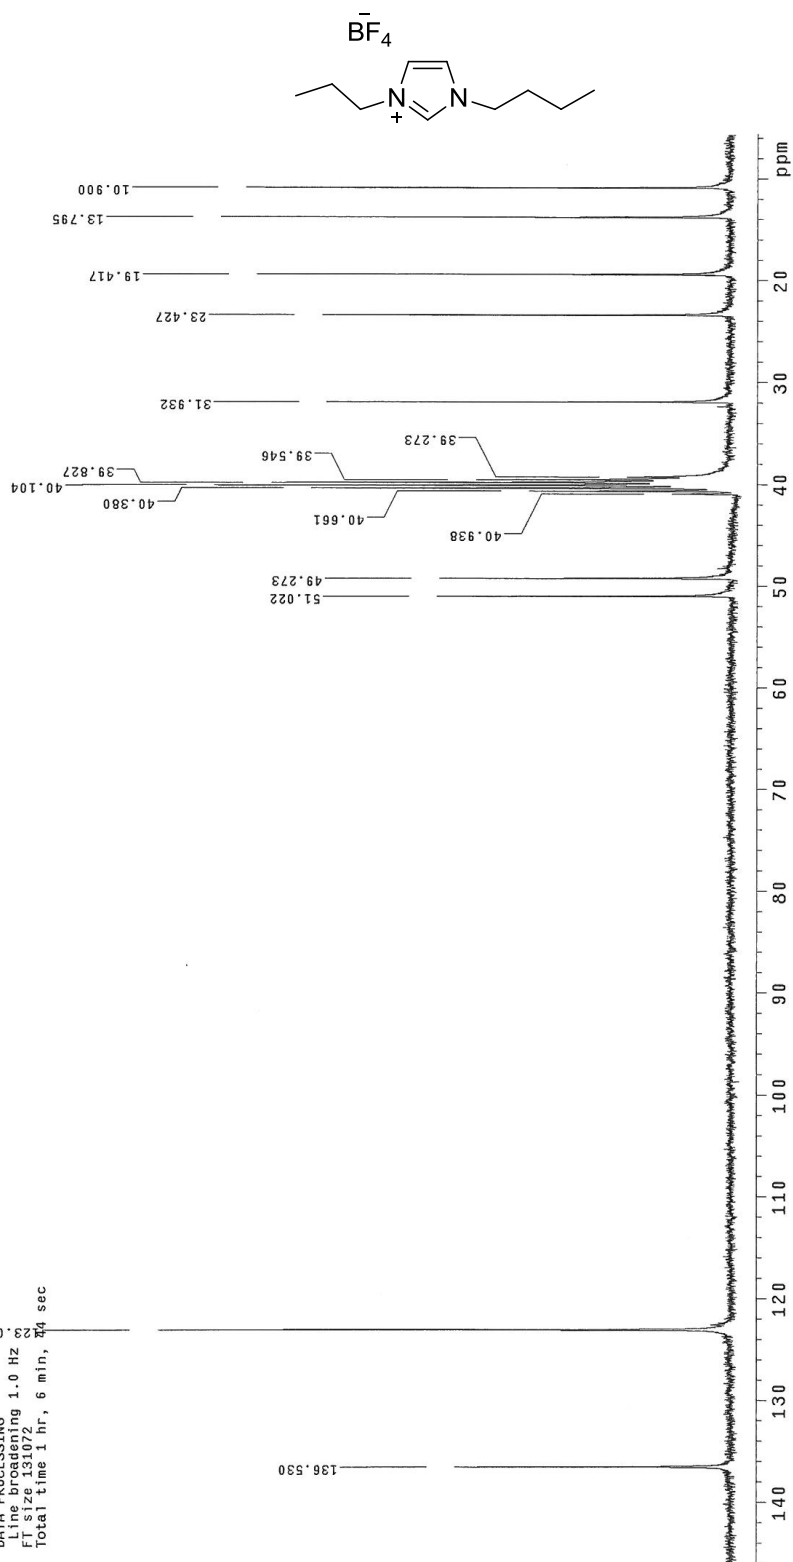

# 1-butyl-3-isopropylimidazolium tetrafluoroborate

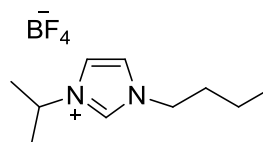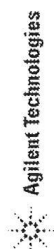

Sample Name:  
 Data Collected on:  
 Agilent-NMR-vnmrs300  
 Archive directory:  
 Sample directory:  
 File: PROTON  
 Pulse Sequence: PROTON (s2pul)  
 Solvent: dms  
 Data collected on: Feb 11 2014  
 Temp. 22.0 C / 295.1 K  
 Operator: laputa20  
 Relax. delay 1.000 sec  
 Pulse 45.0 degrees  
 Acq. time 1.704 sec  
 Width 4807.7 Hz  
 32 repetitions  
 OBSERVE H1, 300.1143866 MHz  
 DATA PROCESSING  
 FT size 16384  
 Total time 1 min 27 sec

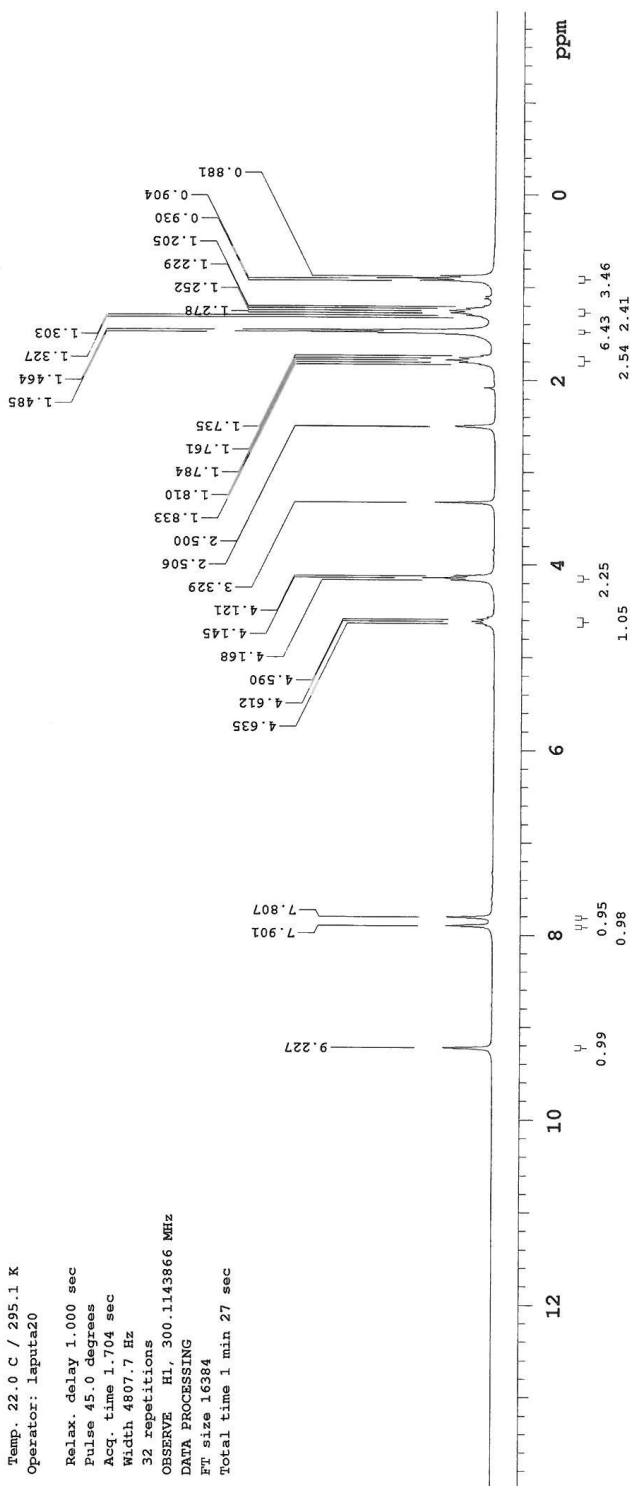

butyl\_isopropyl\_BF4

Sample Name:

Data Collected on:

Agilent-NMR-vnmrs300

Archive directory:

Sample directory:

File: CARBON

Pulse Sequence: CARBON (s2pul)

Solvent: dms

Data collected on: Feb 4 2014

Temp. 22.0 C / 295.1 K

Operator: laputa20

Relax. delay 1.000 sec

Pulse 45.0 degrees

Acq. time 0.865 sec

Width 18939.4 Hz

64 repetitions

OBSERVE C13, 75.4638242 MHz

DECOUPLE H1, 300.1158938 MHz

Power 39 dB

continuously on

WALTZ-16 modulated

DATA PROCESSING

Line broadening 0.5 Hz

FT size 32768

Total time 31 min

Agilent Technologies

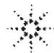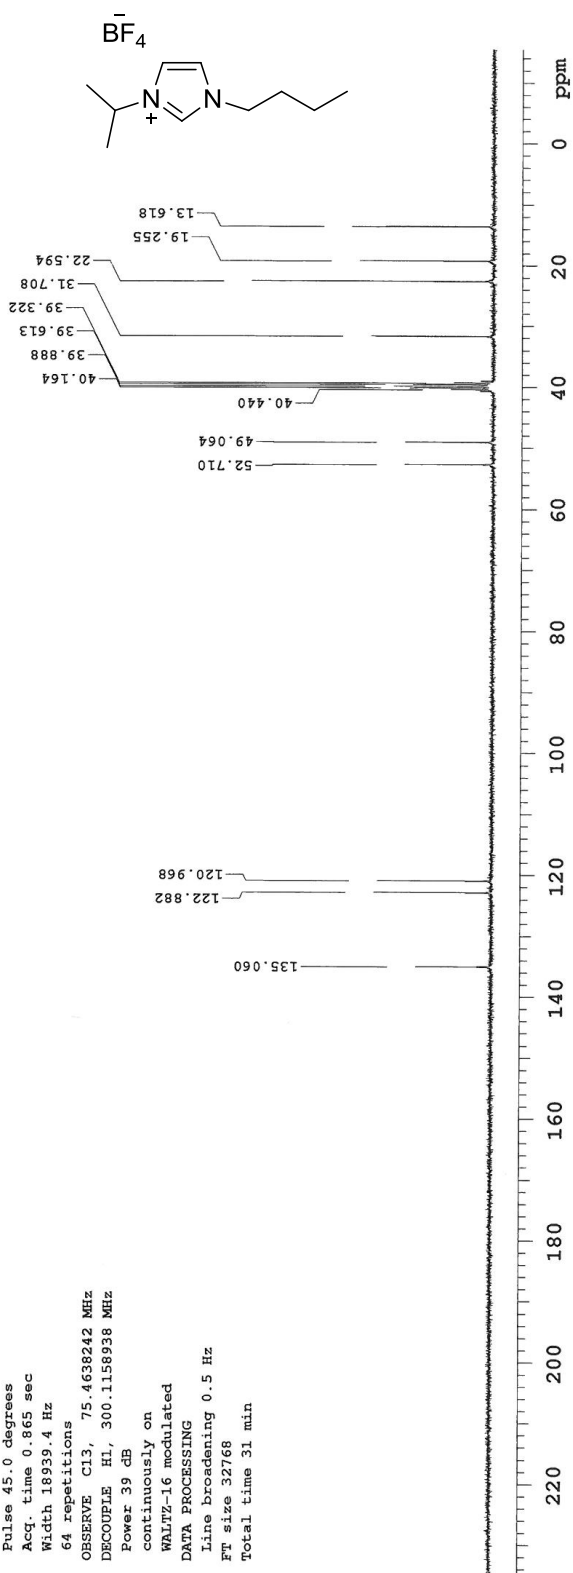

# 1,3-dibutylimidazolium tetrafluoroborate

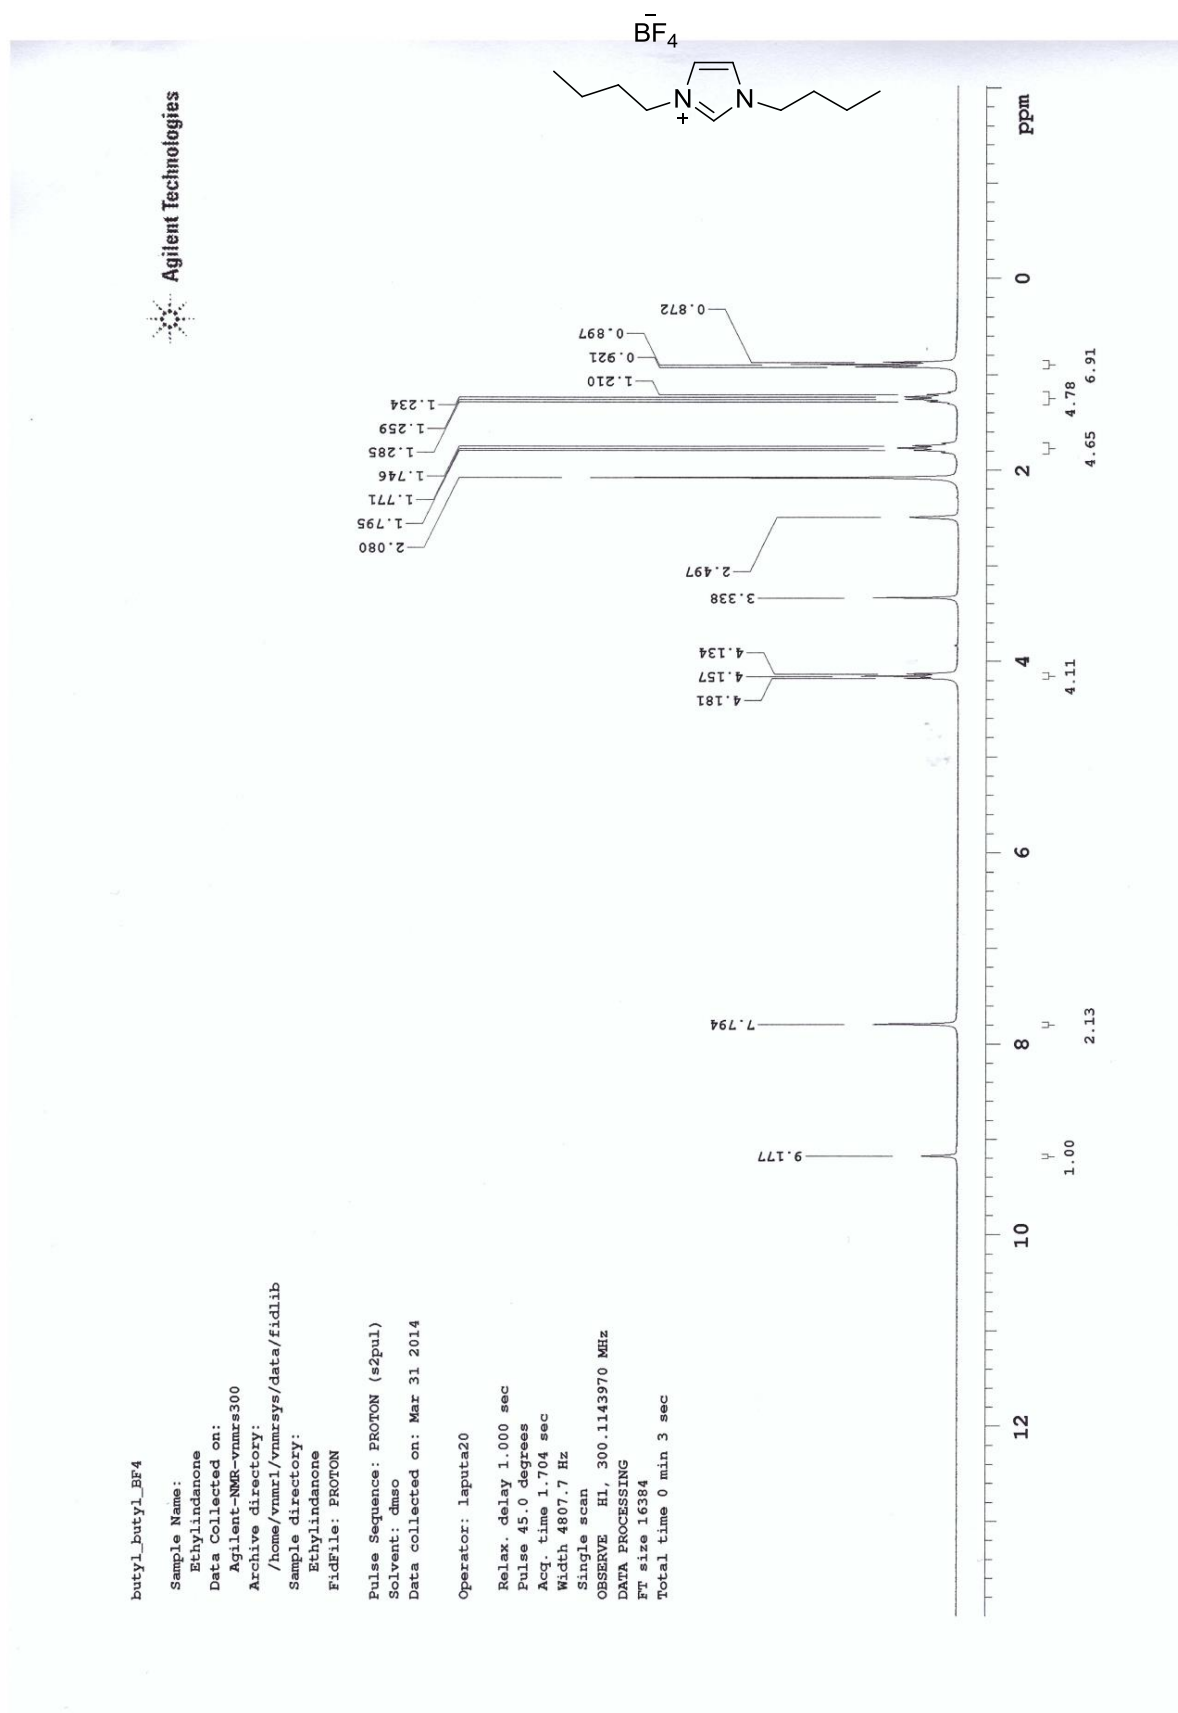



butyl\_butyl\_BF4

Sample Name:  
Ethylindanone  
Data Collected on:  
Agilent-NMR-vnmr300  
Archive directory:  
/home/vnmr1/vnmr300/data/fidlib  
Sample directory:  
Ethylindanone  
FidFile: CARBON

Pulse Sequence: CARBON (s2pul)  
Solvent: dmsd  
Data collected on: Feb 1 2014

Temp. 21.0 C / 294.1 K  
Operator: laputa20

Relax. delay 1.000 sec  
Pulse 45.0 degrees  
Acq. time 0.865 sec  
Width 18939.4 Hz  
896 repetitions  
OBSERVE C13, 75.4638242 MHz  
DECOUPLE H1, 300.1158938 MHz  
Power 39 dB  
continuously on  
WALTZ-16 modulated  
DATA PROCESSING  
Line broadening 0.5 Hz  
Ft size 32768  
Total time 31 min

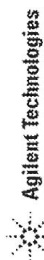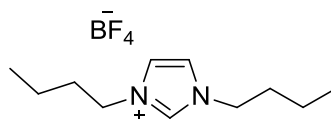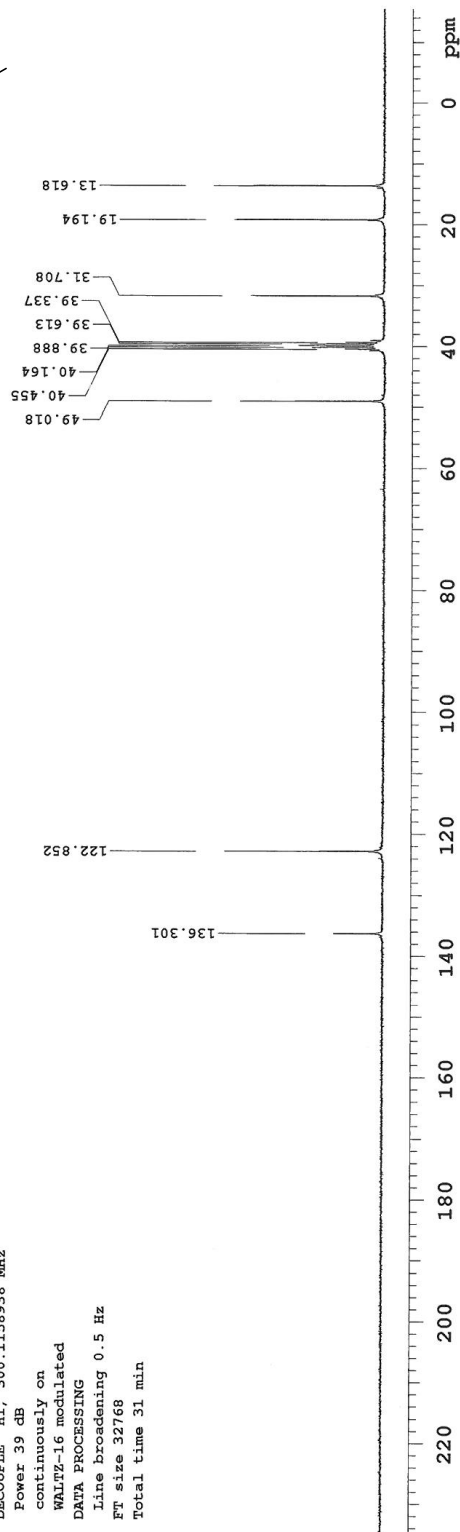

# N-methyloquinolinium tetrafluoroborate

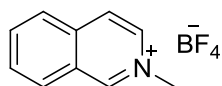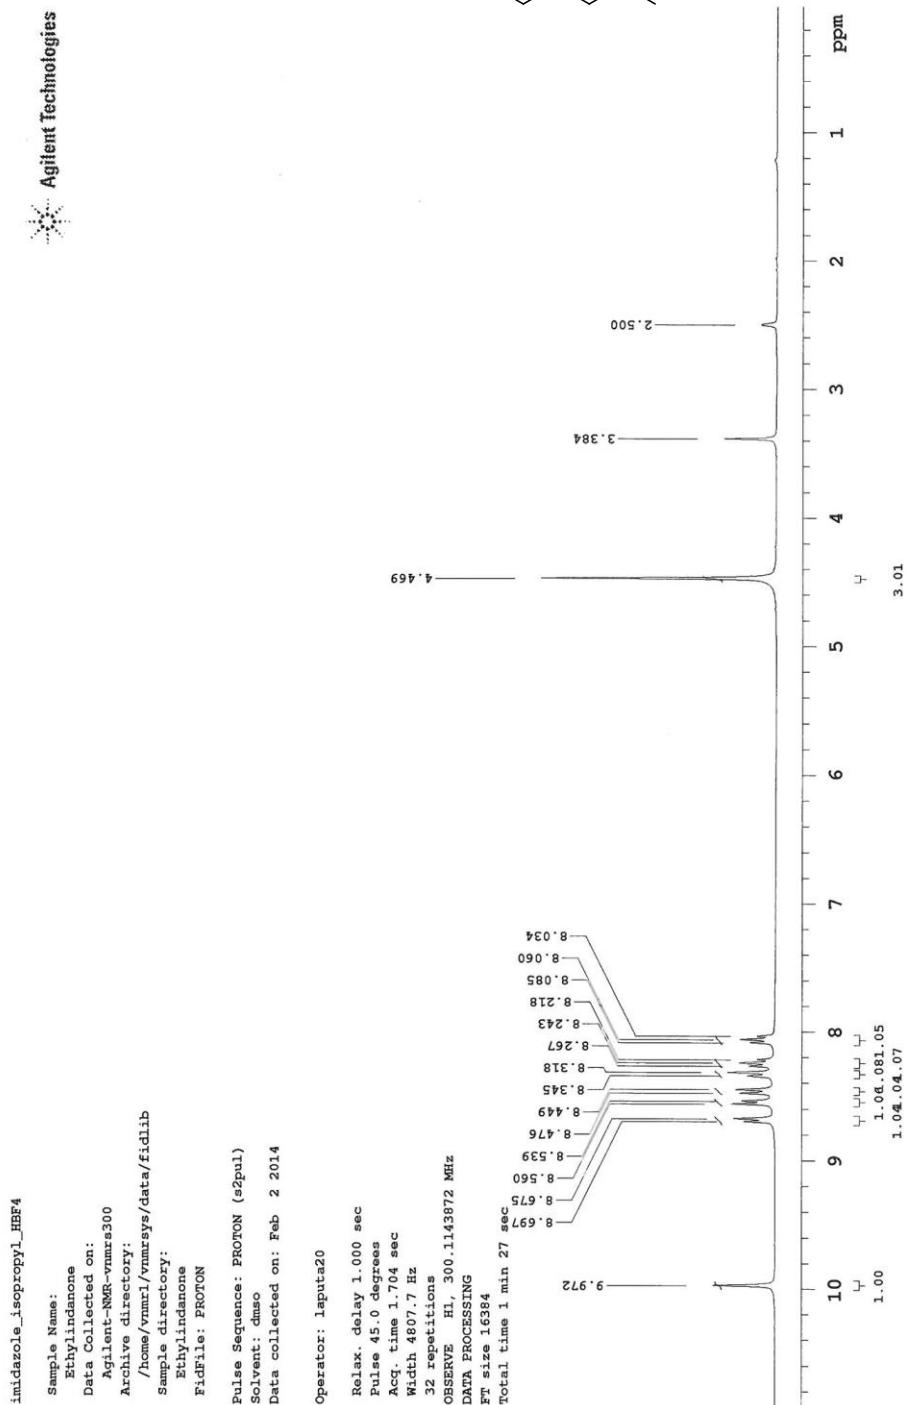

isoquinoline\_methyl\_BF4

Sample Name:  
Ethylindanone  
Data Collected on:  
Agilent-NMR-vnmrs300  
Archive directory:  
/home/vnmr1/vnmrsys/data/fidlib  
Sample directory:  
Ethylindanone  
FidFile: CARBON

Pulse Sequence: CARBON (s2pul)  
Solvent: dmsd  
Data collected on: Feb 2 2014

Operator: laputa20

Relax. delay 1.000 sec  
Pulse 45.0 degrees  
Acq. time 0.865 sec  
Width 18939.4 Hz  
1024 repetitions  
OBSERVE C13, 75.463242 MHz  
DECOUPLE H1, 300.1158938 MHz  
Power 39 dB  
continuously on  
WALTZ-16 modulated  
DATA PROCESSING  
Line broadening 0.5 Hz  
FT size 32768  
Total time 31 min

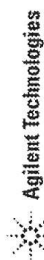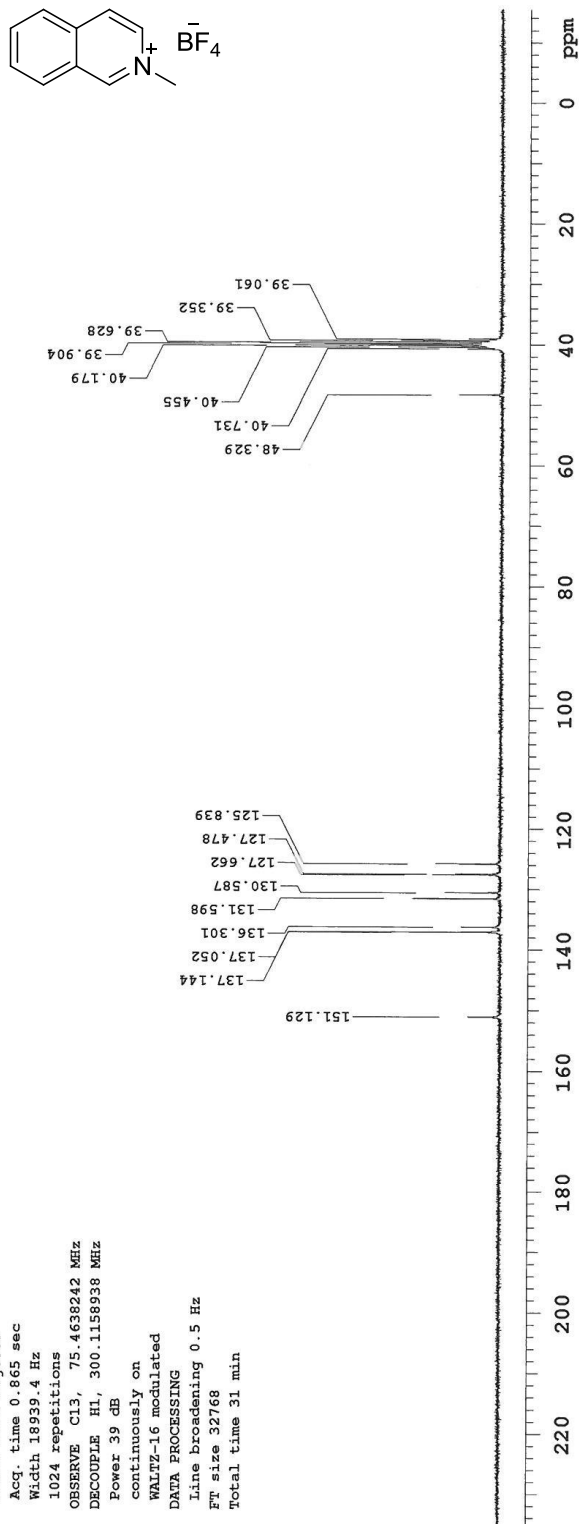

# 1,3-diethylimidazolium tetrafluoroborate

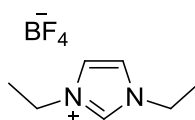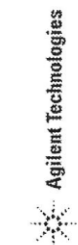

IM\_ethyl\_HBF4

Sample Name:

Data Collected on:  
Agilent-NMR-vnmr300  
Archive directory:

Sample directory:

FidFile: PROTON

Pulse Sequence: PROTON (s2pul)

Solvent: dmsc  
Data collected on: Feb 4 2014

Temp. 22.0 C / 295.1 K  
Operator: laputa20

Relax. delay 1.000 sec

Pulse 45.0 degrees

Acq. time 1.704 sec

Width 4807.7 Hz

Single scan

OBSERVE H1, 300.1143866 MHz

DATA PROCESSING

FT size 16384

Total time 0 min 3 sec

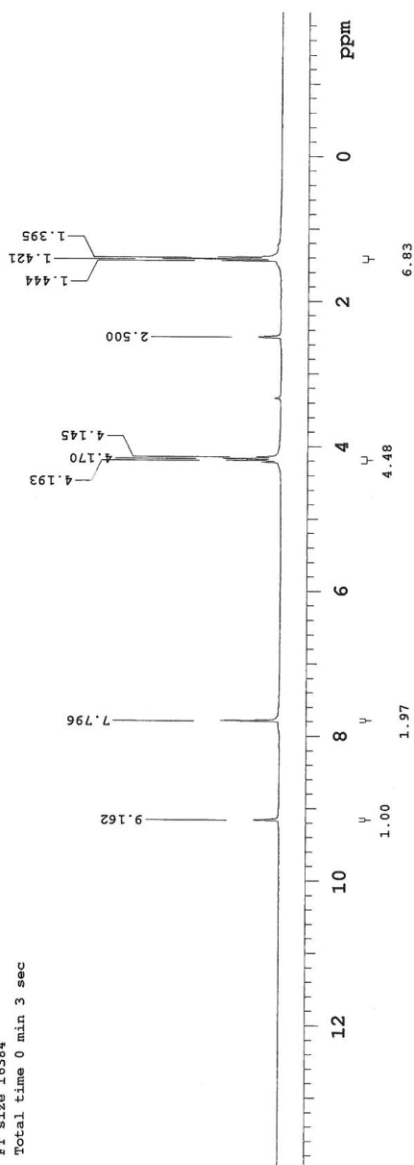

FP\_IM\_HBF4\_ethylation\_C

Sample Name:

Archive directory:

Sample directory:

FidFile: FP\_IM\_HBF4\_ethylation\_C

Pulse Sequence: std13c (s2pul)

Solvent: DMSO

Data collected on: Jan 6 2014

Operator: laputa20

VNMR3-300 "Agilent-NMR"

Relax. delay 1.000 sec

Pulse 103.8 degrees

Acq. time 1.815 sec

Width 18761.7 Hz

1024 repetitions

OBSERVE C13, 75.4638242 MHz

DECOUPLE H1, 300.1153538 MHz

Power 44 dB

on during acquisition

off during delay

WALTZ-16 modulated

DATA PROCESSING

Line broadening 1.0 Hz

FT size 131072

Total time 48 min

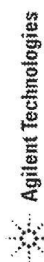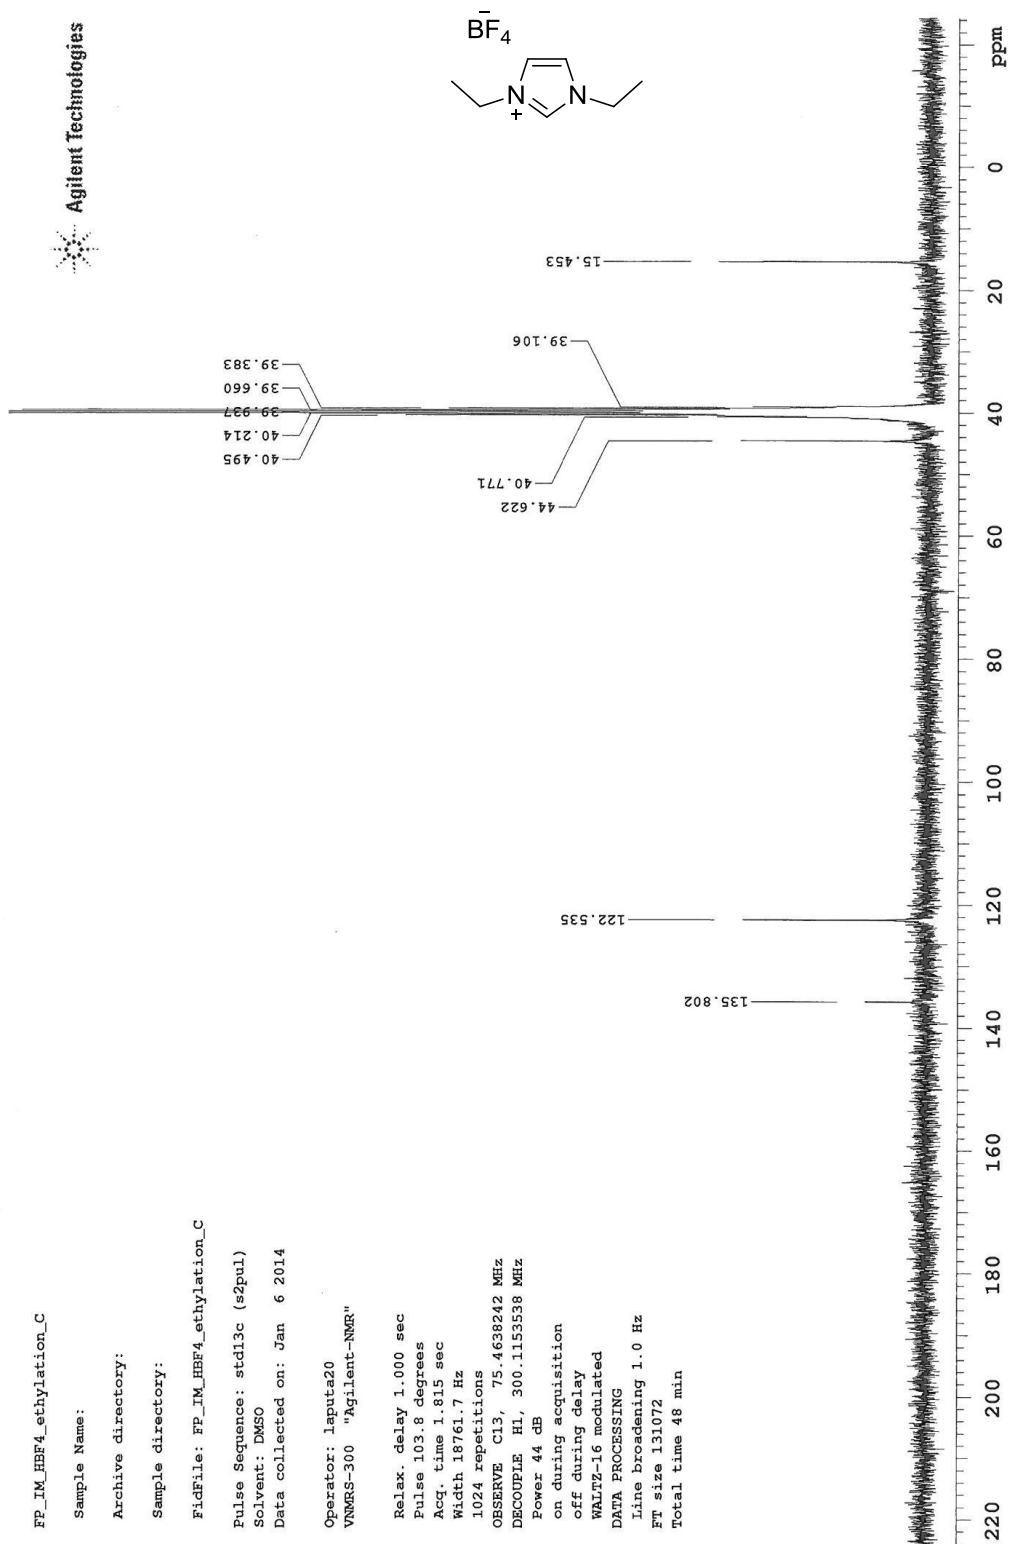

# 1,3-diisopropylimidazolium tetrafluoroborate

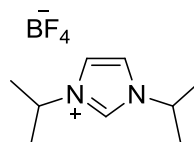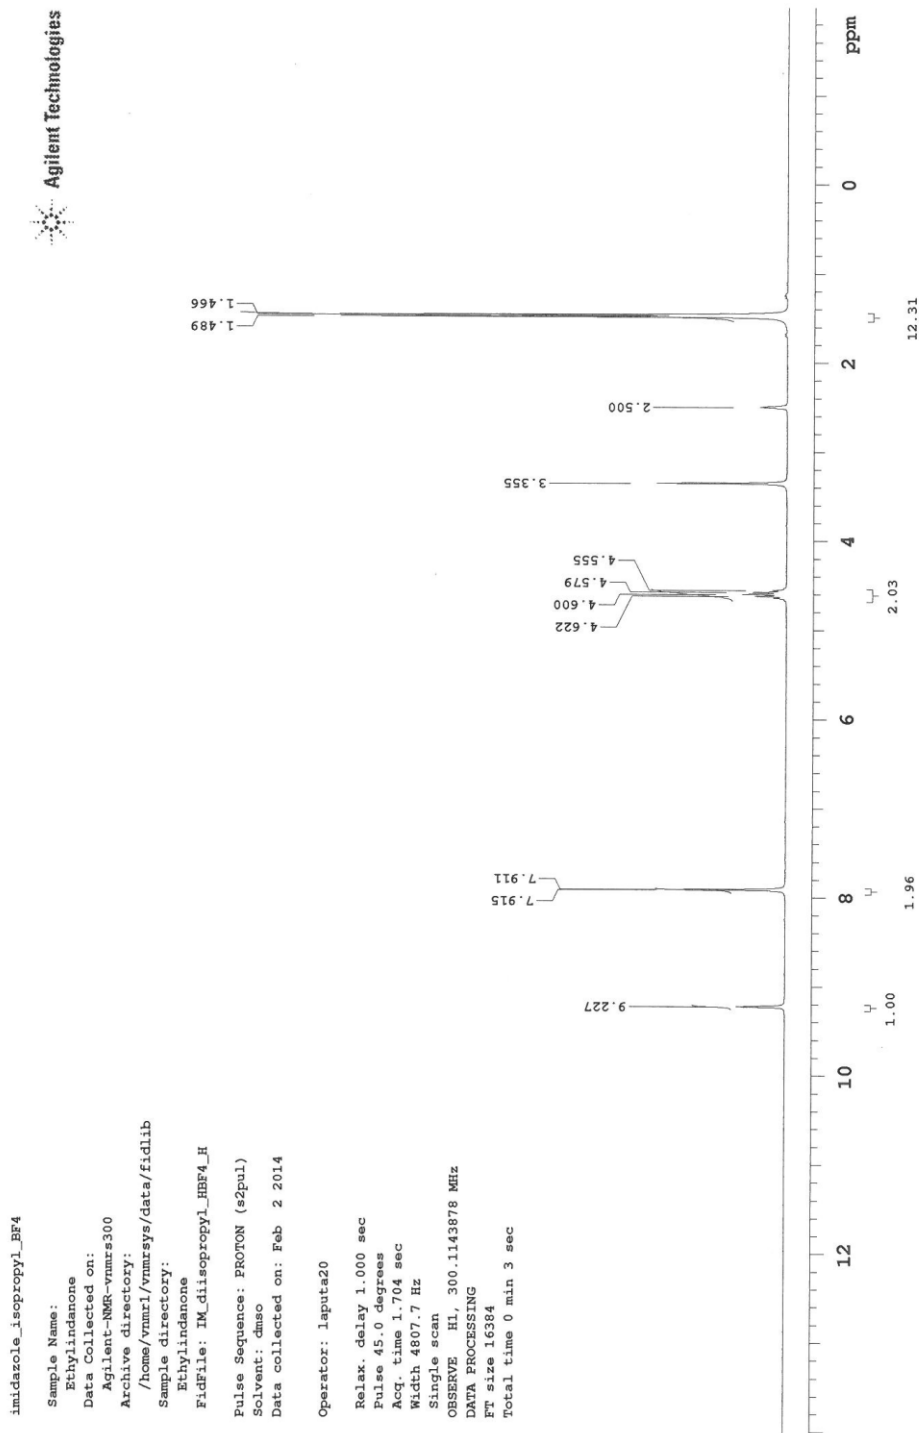

imidazole\_isopropyl\_HBF4

Sample Name:

Ethylindanone

Data Collected on:

Agilent-NMR-vnmrs300

Archive directory:

/home/vnmr1/vnmrsys/data/fidlib

Sample directory:

Ethylindanone

FidFile: IM\_diisopropyl\_HBF4\_C

Pulse Sequence: CARBON (s2pul)

Solvent: dms

Data collected on: Feb 2 2014

Operator: laputa20

Relax. delay 1.000 sec

Pulse 45.0 degrees

Acq. time 0.865 sec

Width 18939.4 Hz

1024 repetitions

OBSERVE C13, 75.4638242 MHz

DECOUPLE H1, 300.1158938 MHz

Power 39 dB

continuously on

WALTZ-16 modulated

DATA PROCESSING

Line broadening 0.5 Hz

FT size 32768

Total time 31 min

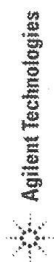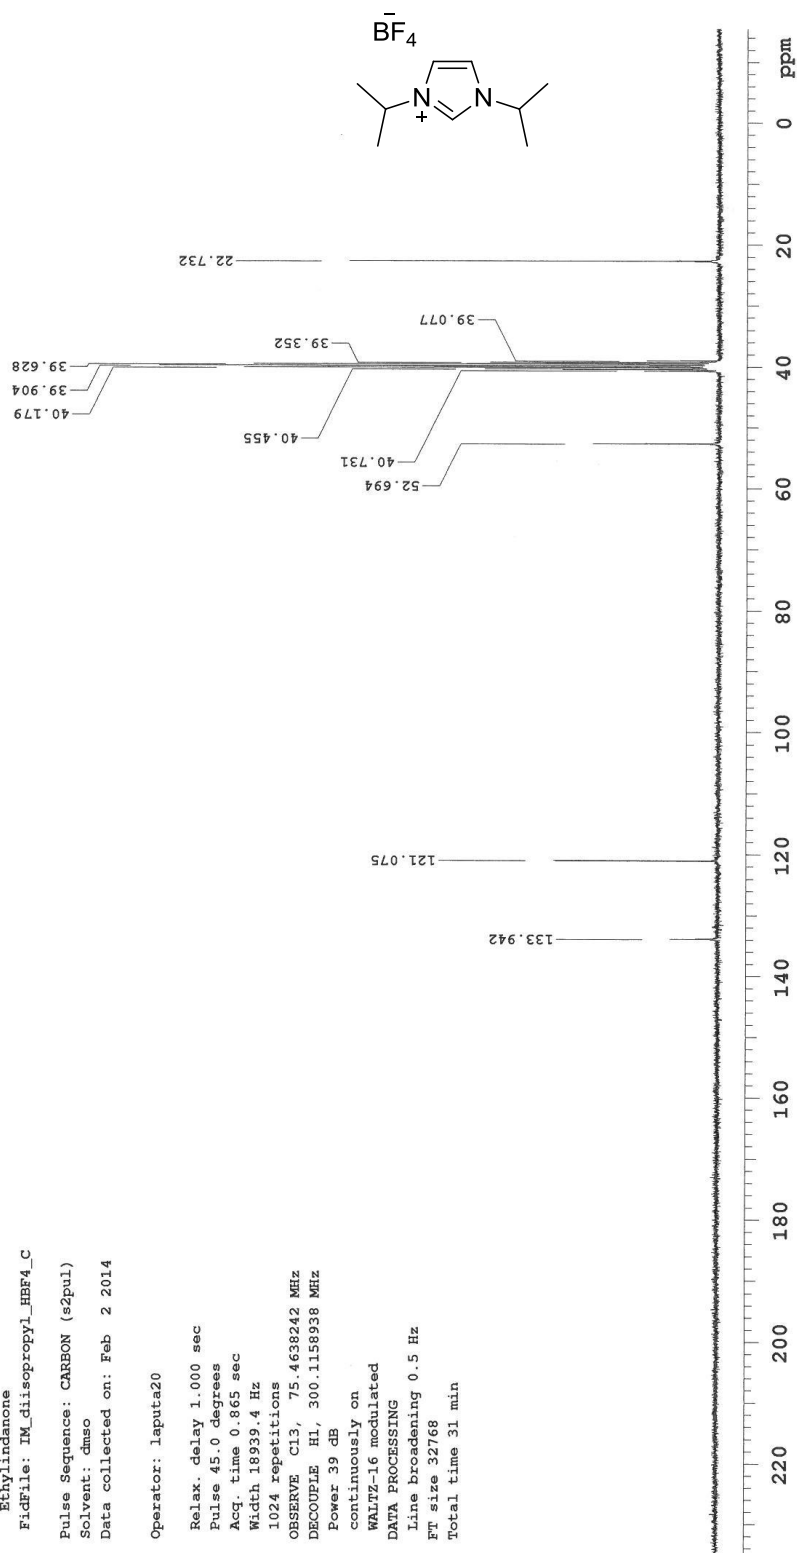

# 1,3-diethylimidazolium 4-methylbenzenesulfonate

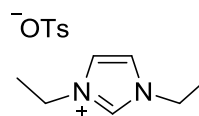

Agilent Technologies

imidazole\_ethyl\_PtSA  
 Sample Name:  
 Ethylindanone  
 Data Collected on:  
 Agilent-NMR-vnmrs300  
 Archive directory:  
 /home/vnmr1/vnmrs/data/fidlib  
 Sample directory:  
 Ethylindanone  
 FIDFile: PROTON

Pulse Sequence: PROTON (s2pul)  
 Solvent: dmsd  
 Data collected on: Feb 1 2014

Temp. 21.0 C / 294.1 K  
 Operator: laputa20

Relax. delay 1.000 sec  
 Pulse 45.0 degrees  
 Acq. time 1.704 sec  
 Width 4807.7 Hz  
 32 repetitions  
 OBSERVE H1, 300.1143872 MHz  
 DATA PROCESSING  
 FT size 16384  
 Total time 1 min 27 sec

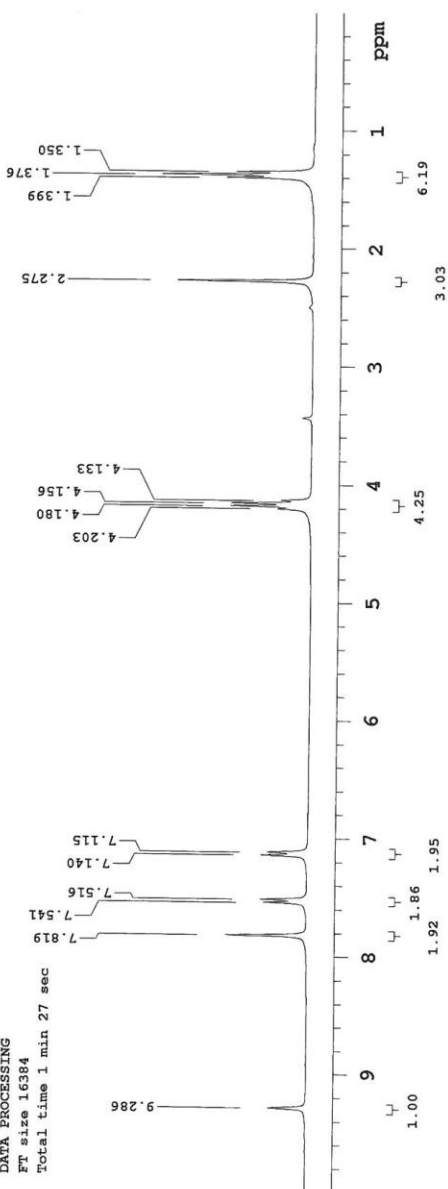



imidazole\_ethyl\_PTSA

Sample Name:  
Ethylindanone  
Data Collected on:  
Agilent-NMR-vnmrs300  
Archive directory:  
/home/vnmr1/vnmrsys/data/fidlib  
Sample directory:  
Ethylindanone  
Fidfile: imidazole\_ethyl\_PTSA\_C

Pulse Sequence: CARBON (s2pul)  
Solvent: dmsc  
Data collected on: Feb 1 2014

Temp. 21.0 C / 294.1 K  
Operator: laputa20

Relax. delay 1.000 sec  
Pulse 45.0 degrees  
Acq. time 0.865 sec  
Width 18939.4 Hz  
1024 repetitions  
OBSERVE C13, 75.4638242 MHz  
DECOUPLE H1, 300.1158938 MHz  
Power 39 dB  
continuously on  
WALTZ-16 modulated  
DATA PROCESSING  
Line broadening 0.5 Hz  
Ft size 32768  
Total time 31 min

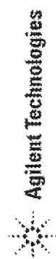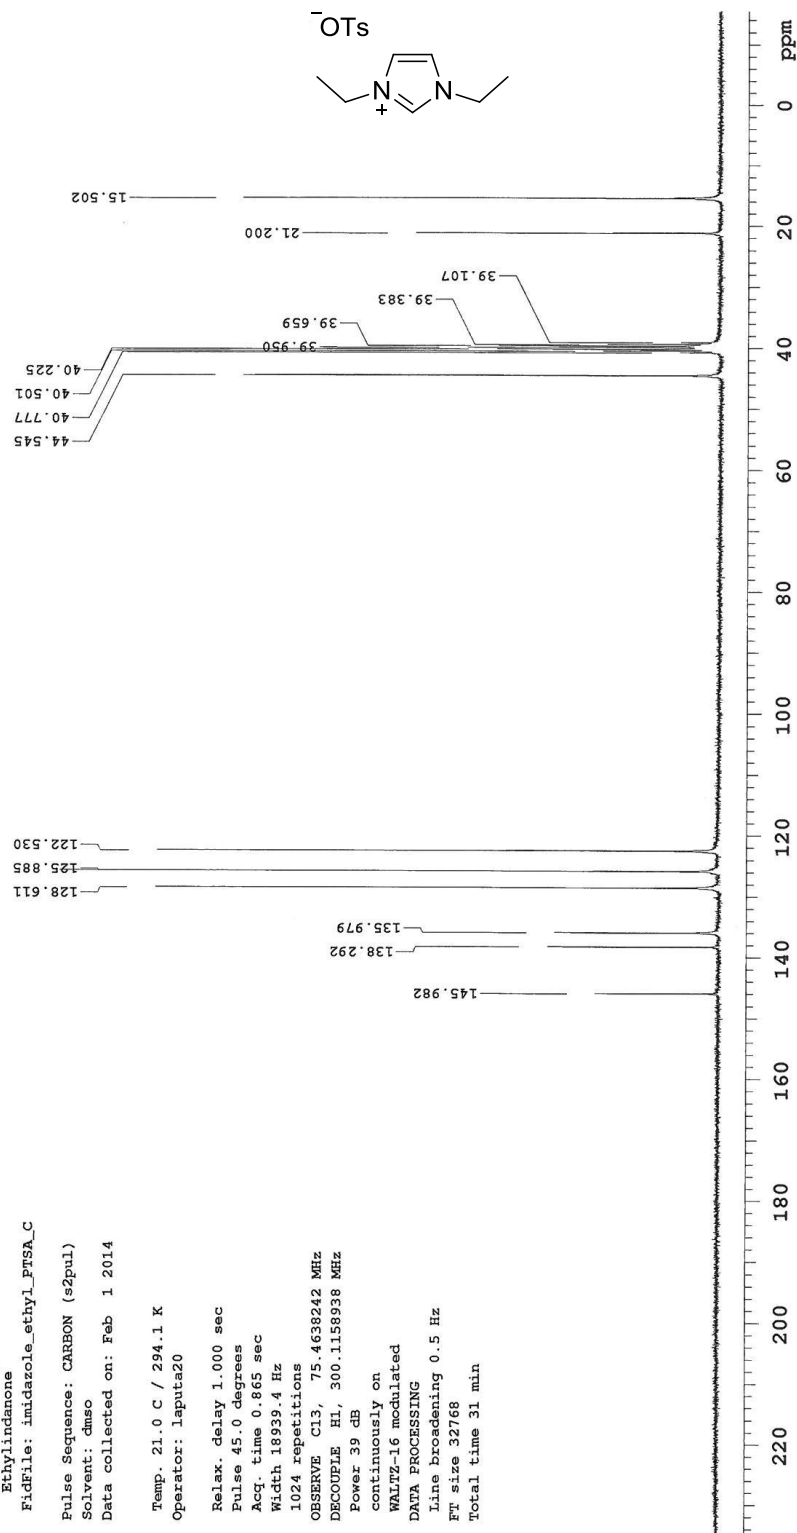

**<sup>19</sup>F NMR spectrum**

**1-butyl-3-methylimidazolium tetrafluoroborate**

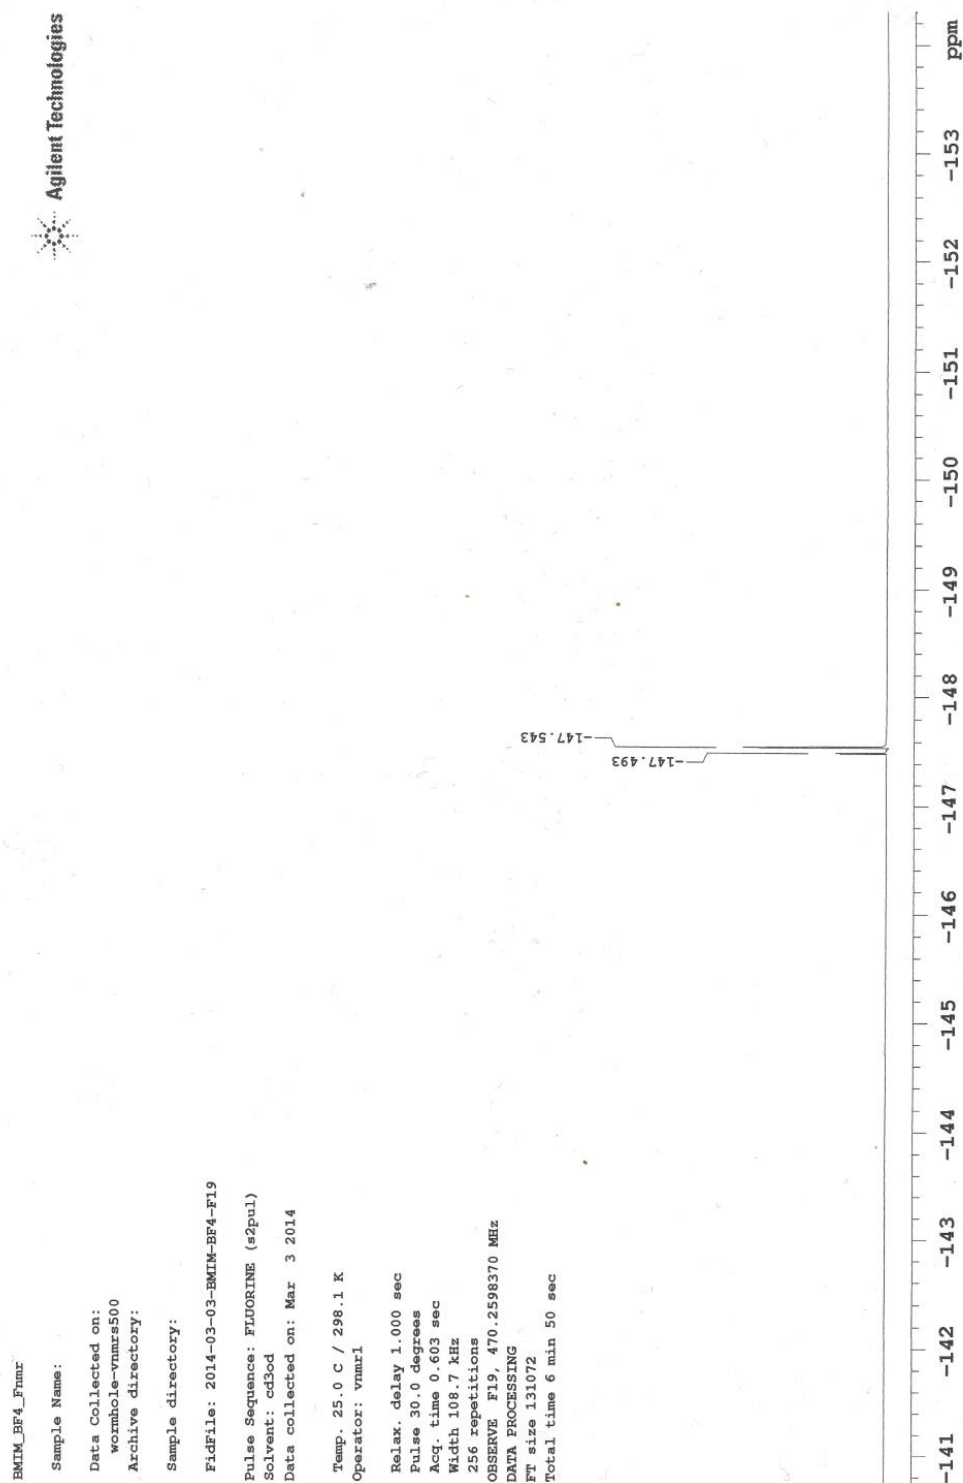

1-butyl-3-methylimidazolium hexafluorophosphate

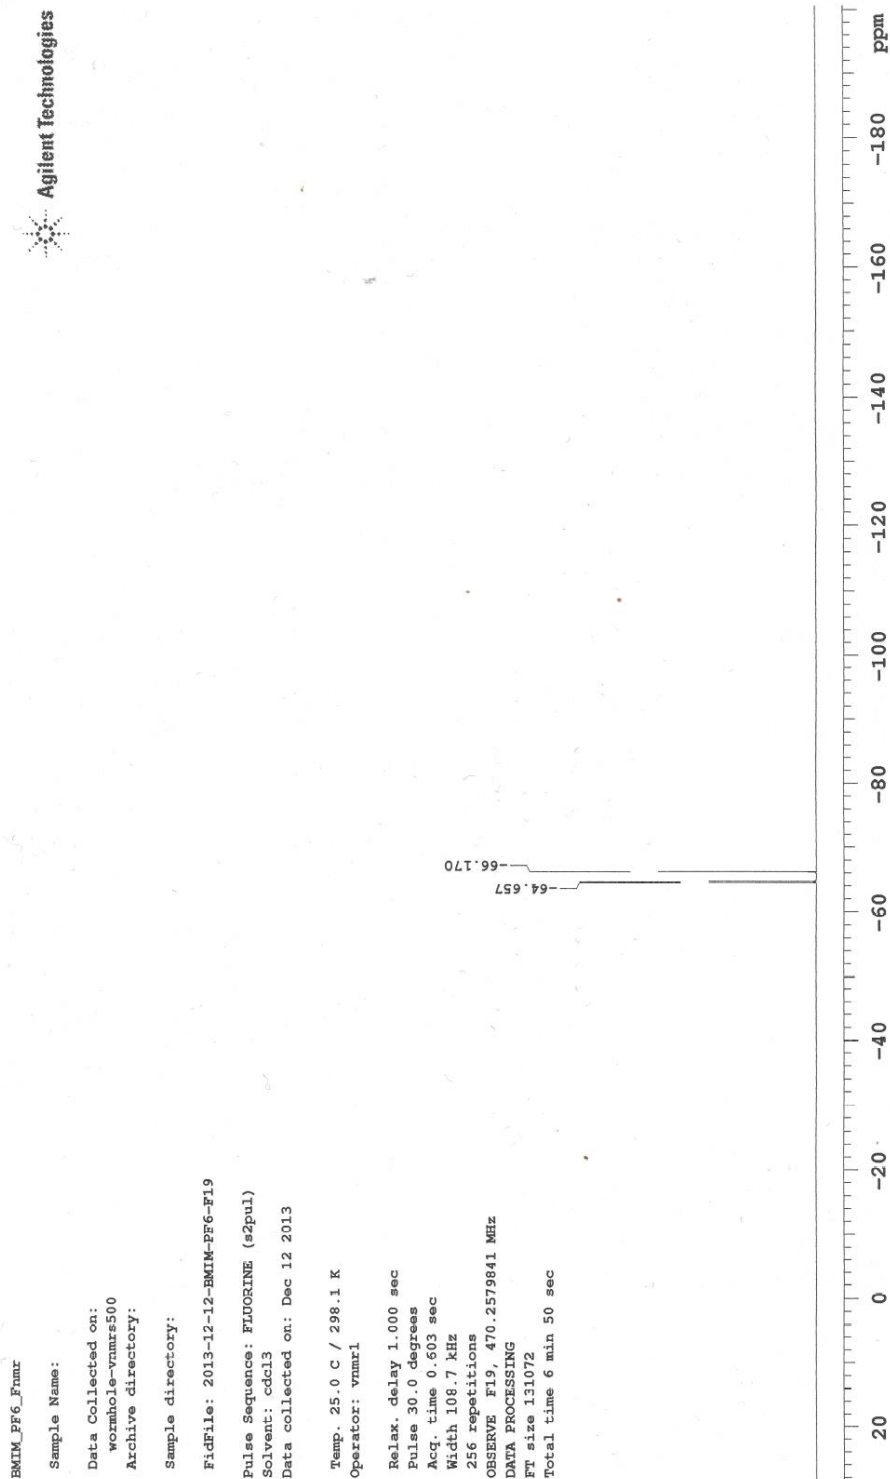

Supplement: c4gc00684d1.pdf [file c4gc00684d1.pdf]
